# Supplementary material for: Orthotopic meningioma rat model exhibits morphological and immunohistochemical congruency and epigenetic concordance with benign primary patient-derived tumors
Source: PubMed Central journal article supplement — Sci Rep. 2024 Dec 30;14:31933. doi: 10.1038/s41598-024-83456-7 (PMC11686083; doi:10.1038/s41598-024-83456-7), 2024-12-30
Supplement: 41598_2024_83456_MOESM2_ESM.pdf [file 41598_2024_83456_MOESM2_ESM.pdf]

## Supplemental material 1 B – Tumor sizes

| Sample           | #  | #1 size (mm2) | #1 perimeter (um) | #2 mm2 | #2 perimeter | #3 mm2 | #3 perimeter | #4 mm2 | #4 perimeter | #5 mm2 | #5 perimeter |
|------------------|----|---------------|-------------------|--------|--------------|--------|--------------|--------|--------------|--------|--------------|
| <b>MO-4 PPDT</b> |    |               |                   |        |              |        |              |        |              |        |              |
|                  | 1  |               |                   |        |              |        |              |        |              |        |              |
|                  | 2  |               |                   |        |              |        |              |        |              |        |              |
|                  | 3  | 0.0392        | 745               | 0.0200 | 594          |        |              |        |              |        |              |
|                  | 4  |               |                   |        |              |        |              |        |              |        |              |
|                  | 5  |               |                   |        |              |        |              |        |              |        |              |
|                  | 6  |               |                   |        |              |        |              |        |              |        |              |
|                  | 7  |               |                   |        |              |        |              |        |              |        |              |
|                  | 8  |               |                   |        |              |        |              |        |              |        |              |
|                  | 9  |               |                   |        |              |        |              |        |              |        |              |
| <b>MO-4 Xeno</b> | 10 |               |                   |        |              |        |              |        |              |        |              |
|                  | 11 |               |                   |        |              |        |              |        |              |        |              |
|                  | 12 | 0.1790        | 2940              | 0.7190 | 4980         | 0.7540 | 3490         |        |              |        |              |
|                  | 13 | 0.1410        | 1650              | 0.0829 | 1697         |        |              |        |              |        |              |
|                  | 14 |               |                   |        |              |        |              |        |              |        |              |
|                  | 15 | 0.0925        | 3005              | 0.0727 | 2170         |        |              |        |              |        |              |
|                  | 16 | 0.4260        | 3560              | 0,4100 | 5840         |        |              |        |              |        |              |
|                  | 17 | 0.0728        | 2436              |        |              |        |              |        |              |        |              |
|                  | 18 | 0.1840        | 4430              | 0.0294 | 674          | 0.0833 | 1729         |        |              |        |              |
|                  | 19 | 0.1060        | 1320              |        |              |        |              |        |              |        |              |
|                  | 20 | 0.2740        | 2660              | 0.2490 | 3000         | 0.3170 | 4210         | 0.3020 | 4290         | 0.4580 | 3090         |

| MO-12 PPDT |    |        |      |        |      |        |      |  |  |
|------------|----|--------|------|--------|------|--------|------|--|--|
|            | 1  |        |      |        |      |        |      |  |  |
|            | 2  |        |      |        |      |        |      |  |  |
|            | 3  |        |      |        |      |        |      |  |  |
|            | 4  |        |      |        |      |        |      |  |  |
|            | 5  | 0.0212 | 752  |        |      |        |      |  |  |
|            | 6  |        |      |        |      |        |      |  |  |
|            | 7  |        |      |        |      |        |      |  |  |
|            | 8  |        |      |        |      |        |      |  |  |
|            | 9  | 0.0146 | 614  |        |      |        |      |  |  |
|            | 10 |        |      |        |      |        |      |  |  |
|            | 11 |        |      |        |      |        |      |  |  |
|            | 12 |        |      |        |      |        |      |  |  |
|            | 13 | 0.0250 | 1280 | 0.0969 | 3280 | 0.0501 | 1540 |  |  |
|            | 14 |        |      |        |      |        |      |  |  |
|            | 15 |        |      |        |      |        |      |  |  |
|            | 16 | 0.0726 | 1777 | 0.2020 | 4560 |        |      |  |  |
|            | 17 |        |      |        |      |        |      |  |  |
|            | 18 |        |      |        |      |        |      |  |  |
|            | 19 | 0.0142 | 758  | 0.0338 | 1724 |        |      |  |  |
|            | 20 |        |      |        |      |        |      |  |  |

MO-12



| MO-27 PPDT |    |        |      |        |      |        |      |        |      |
|------------|----|--------|------|--------|------|--------|------|--------|------|
| MO-27      | 1  |        |      |        |      |        |      |        |      |
|            | 2  |        |      |        |      |        |      |        |      |
|            | 3  |        |      |        |      |        |      |        |      |
|            | 4  | 0.1450 | 1930 | 0.0891 | 1330 | 0.0921 | 1130 | 0.0160 | 484  |
|            | 5  | 0.0391 | 870  | 0.2700 | 3400 | 0.4720 | 4820 | 0.2290 | 2150 |
|            | 6  | 0.1660 | 2170 |        |      |        |      |        |      |
|            | 7  | 0.2160 | 5240 |        |      |        |      |        |      |
|            | 8  | 0.1550 | 1620 | 0.9910 | 8520 |        |      |        |      |
|            | 9  |        |      |        |      |        |      |        |      |
|            | 10 |        |      |        |      |        |      |        |      |
|            | 11 |        |      |        |      |        |      |        |      |
|            | 12 | 0.0563 | 1000 | 0.0159 | 557  | 0.0476 | 1100 |        |      |
|            | 13 | 0.2150 | 2930 |        |      |        |      |        |      |
|            | 14 | 0.6980 | 3660 | 0.6840 | 3570 | 0.9350 | 5510 | 0.3490 | 2480 |
|            | 15 | 0.0679 | 1880 | 0.1440 | 1430 |        |      |        |      |
|            | 16 | 1.1200 | 6280 | 0.1436 | 3999 | 1.4600 | 5490 |        |      |
|            | 17 | 0.0771 | 1120 |        |      |        |      |        |      |
|            | 18 | 0.8860 | 5250 | 0.6790 | 3890 | 0.4350 | 3140 | 0.4170 | 3860 |
|            | 19 | 0.8610 | 4780 | 0.4923 | 8610 | 0.8860 | 9190 | 0.3392 | 4710 |
|            | 20 | 0.7680 | 4810 | 0.6740 | 5460 | 0.7070 | 4120 | 0.4560 | 3530 |
