# Supplementary material for: Orthotopic meningioma rat model exhibits morphological and immunohistochemical congruency and epigenetic concordance with benign primary patient-derived tumors
Source: PubMed Central journal article supplement — Sci Rep. 2024 Dec 30;14:31933. doi: 10.1038/s41598-024-83456-7 (PMC11686083; doi:10.1038/s41598-024-83456-7), 2024-12-30
Supplement: 41598_2024_83456_MOESM4_ESM.pdf [file 41598_2024_83456_MOESM4_ESM.pdf]

## Supplemental Material 5 (SM5) DNA-Methylation Quality Parameters

| Prøve          | x µL DNA for at få 500ng (max 45 µL) | M-Dilution Buffer (µL) | ΣH2O (µL) | DNA input total (ng) | QC       | Detected CpG (0.01) | Detected CpG (%) |
|----------------|--------------------------------------|------------------------|-----------|----------------------|----------|---------------------|------------------|
| MEN-25(1)-T    | 13,3                                 | 5,0                    | 31,7      | ✓ 500,0              | ✓ -0,014 | 860986              | ✓ 99,4           |
| MEN-25(1)-X    | 30,7                                 | 5,0                    | 14,3      | ✓ 500,0              | ✓ 4,324  | 555877              | ▼ 64,2           |
| MEN-27(1)-T.ny | 30,9                                 | 5,0                    | 14,1      | ✓ 500,0              | ✓ -1,637 | 861623              | ✓ 99,5           |
| MEN-27(1)-X    | 45,0                                 | 5,0                    | 0         | ✓ 472,5              | ✓ 2,133  | 828661              | ✓ 95,7           |
| MEN-4-T        | 45,0                                 | 5,0                    | 0         | ✓ 177,8              | ✓ 2,43   | 860291              | ✓ 99,4           |
| MEN-4-X        | 45,0                                 | 5,0                    | 0         | ✓ 495,0              | ✓ 3,997  | 818290              | ▼ 94,5           |

| Sample Name    | Human/Rodent | Sentrix Barcode | Sentrix Position | Restoration | StainingGreen | StainingRed | ExtensionGreen | ExtensionRed | HybridizationHighMedium |
|----------------|--------------|-----------------|------------------|-------------|---------------|-------------|----------------|--------------|-------------------------|
| MEN-25(1)-T    | Human        | 2,07166E+1<br>1 | R05C01           | 3,9         | 51,8          | 38,2        | 42,1           | 15,3         | 1,6                     |
| MEN-25(1)-X    | Xenograft    | 2,07166E+1<br>1 | R06C01           | 5,4         | 134,9         | 36,2        | 57             | 13,5         | 1,6                     |
| MEN-27(1)-T.ny | Human        | 2,07166E+1<br>1 | R07C01           | 4,5         | 83,8          | 44,5        | 36,7           | 14,1         | 1,7                     |
| MEN-27(1)-X    | Xenograft    | 2,07166E+1<br>1 | R08C01           | 5,6         | 95            | 37          | 53,7           | 12,2         | 1,6                     |
| MEN-4-T        | Human        | 2,07166E+1<br>1 | R07C01           | 5,1         | 206,9         | 77,7        | 34,1           | 11,4         | 1,5                     |
| MEN-4-X        | Xenograft    | 2,07166E+1<br>1 | R08C01           | 5,8         | 103,4         | 56,9        | 38,2           | 11           | 1,5                     |

| Sample Name    | Human/Rodent | Sentrix Barcode | Sentrix Position | HybridizationMediumLow | TargetRemoval1 | TargetRemoval2 | BisulfiteConversion1Green | BisulfiteConversion1BackgroundGreen | BisulfiteConversion1Red |
|----------------|--------------|-----------------|------------------|------------------------|----------------|----------------|---------------------------|-------------------------------------|-------------------------|
| MEN-25(1)-T    | Human        | 2,07166E+11     | R05C01           | 1,8                    | 11,8           | 10,2           | 7,3                       | 2,7                                 | 6                       |
| MEN-25(1)-X    | Xenograft    | 2,07166E+11     | R06C01           | 1,8                    | 14,5           | 11             | 5,6                       | 7,5                                 | 6,6                     |
| MEN-27(1)-T.ny | Human        | 2,07166E+11     | R07C01           | 1,8                    | 13,8           | 9,9            | 8,9                       | 3,7                                 | 9,6                     |
| MEN-27(1)-X    | Xenograft    | 2,07166E+11     | R08C01           | 1,9                    | 17,1           | 10,2           | 6                         | 2,9                                 | 7,6                     |
| MEN-4-T        | Human        | 2,07166E+11     | R07C01           | 1,9                    | 8,1            | 6,3            | 11,5                      | 3,3                                 | 5,8                     |
| MEN-4-X        | Xenograft    | 2,07166E+11     | R08C01           | 2                      | 11,2           | 8              | 15,4                      | 6,5                                 | 11,7                    |

| Sample Name    | Human/Rodent | Sentrix Barcode | Sentrix Position | BisulfiteConversion1BackgroundRed | BisulfiteConversion2 | BisulfiteConversion2Background | Specificity1Green | Specificity1Red | Specificity2 |
|----------------|--------------|-----------------|------------------|-----------------------------------|----------------------|--------------------------------|-------------------|-----------------|--------------|
| MEN-25(1)-T    | Human        | 2,07166E+11     | R05C01           | 2                                 | 2,3                  | 0,9                            | 9                 | 5,5             | 13,1         |
| MEN-25(1)-X    | Xenograft    | 2,07166E+11     | R06C01           | 6,7                               | 1,7                  | 1,7                            | 1,7               | 1,6             | 7,1          |
| MEN-27(1)-T.ny | Human        | 2,07166E+11     | R07C01           | 3,3                               | 5,9                  | 2,4                            | 8,8               | 4,9             | 22,1         |
| MEN-27(1)-X    | Xenograft    | 2,07166E+11     | R08C01           | 4,1                               | 1,8                  | 1,3                            | 2,9               | 3               | 9,3          |
| MEN-4-T        | Human        | 2,07166E+11     | R07C01           | 2,4                               | 5,3                  | 1,9                            | 3,5               | 4,1             | 7,3          |
| MEN-4-X        | Xenograft    | 2,07166E+11     | R08C01           | 8,1                               | 2,9                  | 2                              | 2,4               | 3,7             | 11,5         |

| <b>Sample Name</b>    | <b>Human/Rodent</b> | <b>Sentrix<br/>Barcode</b> | <b>Sentrix<br/>Position</b> | <b>Specificity2Background</b> | <b>NonPolymorphicGreen</b> | <b>NonPolymorphicRed</b> |
|-----------------------|---------------------|----------------------------|-----------------------------|-------------------------------|----------------------------|--------------------------|
| <b>MEN-25(1)-T</b>    | Human               | 2,07166E+11                | R05C01                      | 3,4                           | 11,1                       | 14,8                     |
| <b>MEN-25(1)-X</b>    | Xenograft           | 2,07166E+11                | R06C01                      | 10                            | 6,9                        | 4,9                      |
| <b>MEN-27(1)-T.ny</b> | Human               | 2,07166E+11                | R07C01                      | 6,2                           | 12,6                       | 12,2                     |
| <b>MEN-27(1)-X</b>    | Xenograft           | 2,07166E+11                | R08C01                      | 8,2                           | 8,1                        | 9,5                      |
| <b>MEN-4-T</b>        | Human               | 2,07166E+11                | R07C01                      | 4,3                           | 5,8                        | 12,9                     |
| <b>MEN-4-X</b>        | Xenograft           | 2,07166E+11                | R08C01                      | 7,9                           | 15,3                       | 9,1                      |
