# Supplementary material for: Orthotopic meningioma rat model exhibits morphological and immunohistochemical congruency and epigenetic concordance with benign primary patient-derived tumors
Source: PubMed Central journal article supplement — Sci Rep. 2024 Dec 30;14:31933. doi: 10.1038/s41598-024-83456-7 (PMC11686083; doi:10.1038/s41598-024-83456-7), 2024-12-30
Supplement: 41598_2024_83456_MOESM5_ESM.pdf [file 41598_2024_83456_MOESM5_ESM.pdf]

# Supplemental Material 6 (SM6) Full BrainClassifier reports

# Methylation profiling report

## Supplier information

Sample identifier: 207166150179\_R07C01  
 Satrix ID: 207166150179\_R07C01  
 Material type: NA  
 Gender: NA  
 Supplier diagnosis: MEN-27(1)-T.ny

| Automatic prediction |                                                                                                                                                                                                                                  |
|----------------------|----------------------------------------------------------------------------------------------------------------------------------------------------------------------------------------------------------------------------------|
| Array type:          | EPIC                                                                                                                                                                                                                             |
| Material type:       | DNA-FFPE <span style="float: right;">✗</span>                                                                                                                                                                                    |
| Gender:              | female <span style="float: right;">!</span>                                                                                                                                                                                      |
| Legend:              | <span style="color: green;">✔</span> Ok<br><span style="color: orange;">!</span> Supplier information or prediction not available<br><span style="color: red;">✗</span> Warning, mismatch of prediction and supplier information |

## Brain tumor classifier results (12.5)

| Methylation classes<br>(Highest level >= 0.3, lower levels >= 0.1, all of lowest level) |                                                   | Calibrated score | Interpretation |   |
|-----------------------------------------------------------------------------------------|---------------------------------------------------|------------------|----------------|---|
| Meningioma                                                                              |                                                   | 0.99             | match          | ✔ |
|                                                                                         | Meningioma                                        | 0.99             | match          | ✔ |
|                                                                                         | Meningioma, Benign                                | 0.99             | match          | ✔ |
|                                                                                         | Mc Meningioma, Subtype Benign, Subclass 2 (novel) | 0.76             | no match       | ✗ |
|                                                                                         | Mc Meningioma, Subtype Benign, Subclass 3 (novel) | 0.21             | no match       | ✗ |
|                                                                                         | Mc Meningioma, Subtype Benign, Subclass 1 (novel) | 0.00             | no match       | ✗ |

Legend: ✔ Match (score >= 0.9) ✗ No match (score < 0.9): possibly still relevant for low tumor content and low DNA quality cases. ● Match to MC family member (score >= 0.5)

## Class descriptions

**MC Meningioma, subtype benign, subclass 2 (novel):** The "mc Meningioma benign" comprises meningiomas epigenetically in one of the groups benign-1, 2 or 3. Subclass benign-1 cases typically show 22q deletions/NF2 mutations and rarely other mutations or CNVs. Histology is mostly but not exclusively fibroblastic, psammomatous or transitional. Subclass benign-2 cases typically show AKT1/TRAF7, KLF4/TRAF7 or SMO mutations and rarely other mutations or CNVs. Histology is mostly meningeothelial (then typically AKT1 mutant) or secretory (KLF4 mutant). Subclass benign-3 cases typically show trisomy 5, other trisomies, and can show 22q deletions/NF2 mutations and rarely other mutations or CNVs. Histology is mostly but not exclusively angiomatous, metaplastic, or microcytic. Prognosis in this mc is typically favourable, similar to WHO grade 1. Integration of meningioma subclasses into the brain tumor classifier is under development, thus, the specific meningioma classifier should be consulted in parallel. Integration of histology, methylation and CNVs can further increase prognostic accuracy.

**MC Meningioma, subtype benign, subclass 3 (novel):** The "mc Meningioma benign" comprises meningiomas epigenetically in one of the groups benign-1, 2 or 3. Subclass benign-1 cases typically show 22q deletions/NF2 mutations and rarely other mutations or CNVs. Histology is mostly but not exclusively fibroblastic, psammomatous or transitional. Subclass benign-2 cases typically show AKT1/TRAF7, KLF4/TRAF7 or SMO mutations and rarely other mutations or CNVs. Histology is mostly meningeothelial (then typically AKT1 mutant) or secretory (KLF4 mutant). Subclass benign-3 cases typically show trisomy 5, other trisomies, and can show 22q deletions/NF2 mutations and rarely other mutations or CNVs. Histology is mostly but not exclusively angiomatous, metaplastic, or microcytic. Prognosis in this mc is typically favourable, similar to WHO grade 1. Integration of meningioma subclasses into the brain tumor classifier is under development, thus, the specific meningioma classifier should be consulted in parallel. Integration of histology, methylation and CNVs can further increase prognostic accuracy.

**MC Meningioma, subtype benign, subclass 1 (novel):** The "mc Meningioma benign" comprises meningiomas epigenetically in one of the groups benign-1, 2 or 3. Subclass benign-1 cases typically show 22q deletions/NF2 mutations and rarely other mutations or CNVs. Histology is mostly but not exclusively fibroblastic, psammomatous or transitional. Subclass benign-2 cases typically show AKT1/TRAF7, KLF4/TRAF7 or SMO mutations and rarely other mutations or CNVs. Histology is mostly meningeothelial (then typically AKT1 mutant) or secretory (KLF4 mutant). Subclass benign-3 cases typically show trisomy 5, other trisomies, and can show 22q deletions/NF2 mutations and rarely other mutations or CNVs. Histology is mostly but not exclusively angiomatous, metaplastic, or microcytic. Prognosis in this mc is typically favourable, similar to WHO grade 1. Integration of meningioma subclasses into the brain tumor classifier is under development, thus, the specific meningioma classifier should be consulted in parallel.

Integration of histology, methylation and CNVs can further increase prognostic accuracy.

## Copy number variation profile

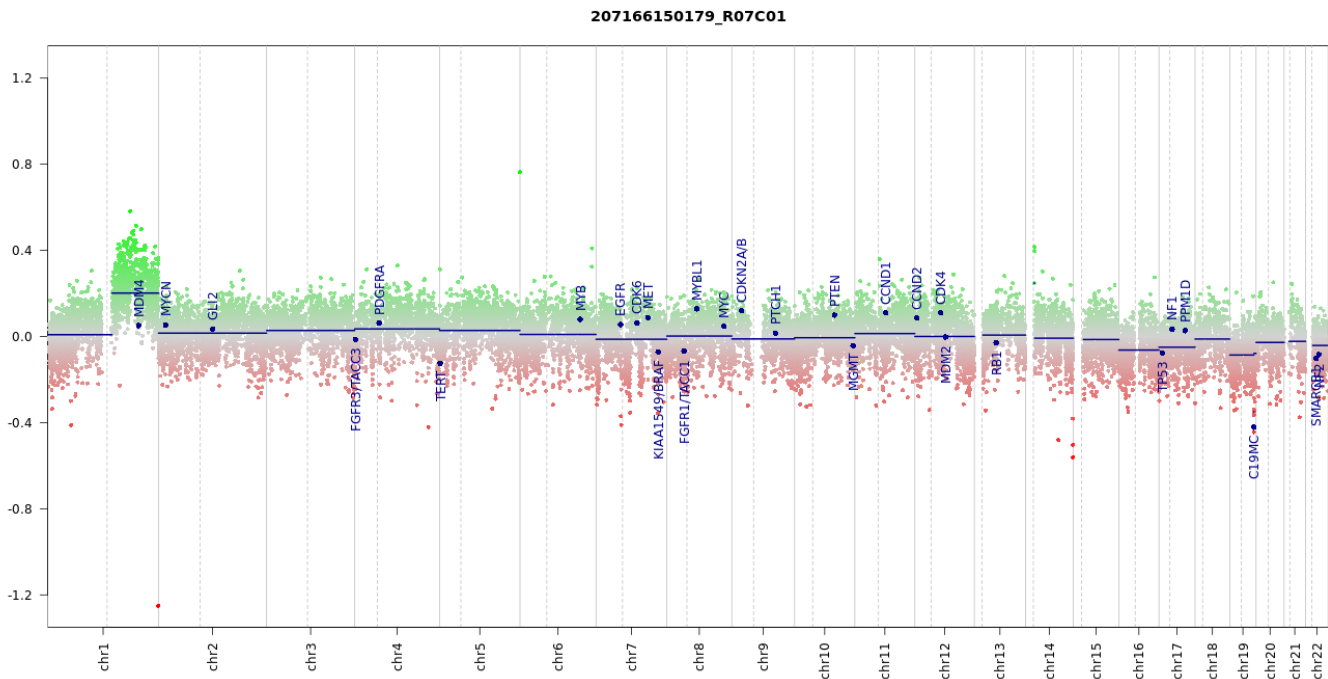

Depiction of chromosome 1 to 22 (and X/Y if automatic prediction was successful). Gains/amplifications represent positive, losses negative deviations from the baseline. 29 brain tumor relevant gene regions are highlighted for easier assessment. (see Hovestadt & Zapatka, <http://www.bioconductor.org/packages/devel/bioc/html/conumee.html>)

## MGMT promotor methylation (MGMT-STP27)

MGMT promotor status prediction

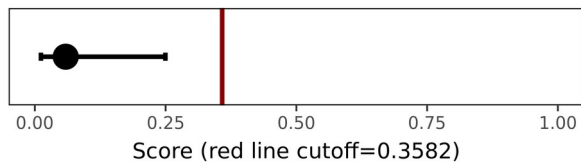

| Status       | Estimated | CI lower | CI upper |
|--------------|-----------|----------|----------|
| unmethylated | 0.05905   | 0.01170  | 0.24963  |

(see Bady et al, J Mol Diagn 2016; 18(3):350-61)

## Disclaimer

Classification using methylation profiling is a tool for research use only, it is not verified and has not been clinically validated and, therefore, must not be used for diagnostic purposes. This tool is not HIPAA compliant.

## Run information

**Report:** report\_website\_mnp\_brain\_v12.5\_sample (Version 1.0)

### Task version:

| Task                                    | Version |
|-----------------------------------------|---------|
| idat_preprocess                         | 2.0.1   |
| idat_qc                                 | 2.0.1   |
| idat_predictBrain                       | 2.0.1   |
| idat_rs_gender                          | 2.0.1   |
| idat_cnvp                               | 3.0.1   |
| idat_mgmt                               | 2.0.1   |
| report_website_mnp_brain_v11b4_research | 2.1     |
| report_website_mnp_brain_v11b4_sample   | 2.1     |
| idat_predictBrain                       | 12.5    |
| report_website_mnp_brain_v12.5_sample   | 1.0     |

# Methylation profiling report

## Supplier information

Sample identifier: 207166150179\_R08C01  
Sentry ID: 207166150179\_R08C01  
Material type: NA  
Gender: NA  
Supplier diagnosis: MEN-27(1)-X

| Automatic prediction |                                                                                                                                                                                                                            |
|----------------------|----------------------------------------------------------------------------------------------------------------------------------------------------------------------------------------------------------------------------|
| Array type:          | EPIC                                                                                                                                                                                                                       |
| Material type:       | DNA-FFPE <span style="color: red;">✗</span>                                                                                                                                                                                |
| Gender:              | female <span style="color: orange;">!</span>                                                                                                                                                                               |
| Legend:              | <span style="color: green;">✓</span> Ok <span style="color: orange;">!</span> Supplier information or prediction not available <span style="color: red;">✗</span> Warning, mismatch of prediction and supplier information |

## Brain tumor classifier results (12.5)

| Methylation classes<br>(Highest level $\geq 0.3$ , lower levels $\geq 0.1$ , all of lowest level) |                                                   | Calibrated score | Interpretation |                                      |
|---------------------------------------------------------------------------------------------------|---------------------------------------------------|------------------|----------------|--------------------------------------|
| Meningioma                                                                                        |                                                   | 0.98             | match          | <span style="color: green;">✓</span> |
|                                                                                                   | Meningioma                                        | 0.98             | match          | <span style="color: green;">✓</span> |
|                                                                                                   | Meningioma, Benign                                | 0.96             | match          | <span style="color: green;">✓</span> |
|                                                                                                   | Mc Meningioma, Subtype Benign, Subclass 3 (novel) | 0.92             | match          | <span style="color: green;">✓</span> |
|                                                                                                   | Mc Meningioma, Subtype Benign, Subclass 2 (novel) | 0.04             | no match       | <span style="color: red;">✗</span>   |
|                                                                                                   | Mc Meningioma, Subtype Benign, Subclass 1 (novel) | 0.00             | no match       | <span style="color: red;">✗</span>   |

Legend: ✓ Match (score  $\geq 0.9$ ) ✗ No match (score  $< 0.9$ ): possibly still relevant for low tumor content and low DNA quality cases. ● Match to MC family member (score  $\geq 0.5$ )

## Class descriptions

**MC Meningioma, subtype benign, subclass 3 (novel):** The "mc Meningioma benign" comprises meningiomas epigenetically in one of the groups benign-1, 2 or 3. Subclass benign-1 cases typically show 22q deletions/NF2 mutations and rarely other mutations or CNVs. Histology is mostly but not exclusively fibroblastic, psammomatous or transitional. Subclass benign-2 cases typically show AKT1/TRAF7, KLF4/TRAF7 or SMO mutations and rarely other mutations or CNVs. Histology is mostly meningeothelial (then typically AKT1 mutant) or secretory (KLF4 mutant). Subclass benign-3 cases typically show trisomy 5, other trisomies, and can show 22q deletions/NF2 mutations and rarely other mutations or CNVs. Histology is mostly but not exclusively angiomatous, metaplastic, or microcytic. Prognosis in this mc is typically favourable, similar to WHO grade 1. Integration of meningioma subclasses into the brain tumor classifier is under development, thus, the specific meningioma classifier should be consulted in parallel. Integration of histology, methylation and CNVs can further increase prognostic accuracy.

**MC Meningioma, subtype benign, subclass 2 (novel):** The "mc Meningioma benign" comprises meningiomas epigenetically in one of the groups benign-1, 2 or 3. Subclass benign-1 cases typically show 22q deletions/NF2 mutations and rarely other mutations or CNVs. Histology is mostly but not exclusively fibroblastic, psammomatous or transitional. Subclass benign-2 cases typically show AKT1/TRAF7, KLF4/TRAF7 or SMO mutations and rarely other mutations or CNVs. Histology is mostly meningeothelial (then typically AKT1 mutant) or secretory (KLF4 mutant). Subclass benign-3 cases typically show trisomy 5, other trisomies, and can show 22q deletions/NF2 mutations and rarely other mutations or CNVs. Histology is mostly but not exclusively angiomatous, metaplastic, or microcytic. Prognosis in this mc is typically favourable, similar to WHO grade 1. Integration of meningioma subclasses into the brain tumor classifier is under development, thus, the specific meningioma classifier should be consulted in parallel. Integration of histology, methylation and CNVs can further increase prognostic accuracy.

**MC Meningioma, subtype benign, subclass 1 (novel):** The "mc Meningioma benign" comprises meningiomas epigenetically in one of the groups benign-1, 2 or 3. Subclass benign-1 cases typically show 22q deletions/NF2 mutations and rarely other mutations or CNVs. Histology is mostly but not exclusively fibroblastic, psammomatous or transitional. Subclass benign-2 cases typically show AKT1/TRAF7, KLF4/TRAF7 or SMO mutations and rarely other mutations or CNVs. Histology is mostly meningeothelial (then typically AKT1 mutant) or secretory (KLF4 mutant). Subclass benign-3 cases typically show trisomy 5, other trisomies, and can show 22q deletions/NF2 mutations and rarely other mutations or CNVs. Histology is mostly but not exclusively angiomatous, metaplastic, or microcytic. Prognosis in this mc is typically favourable, similar to WHO grade 1. Integration of meningioma subclasses into the brain tumor classifier is under development, thus, the specific meningioma classifier should be consulted in parallel.

Integration of histology, methylation and CNVs can further increase prognostic accuracy.

## Copy number variation profile

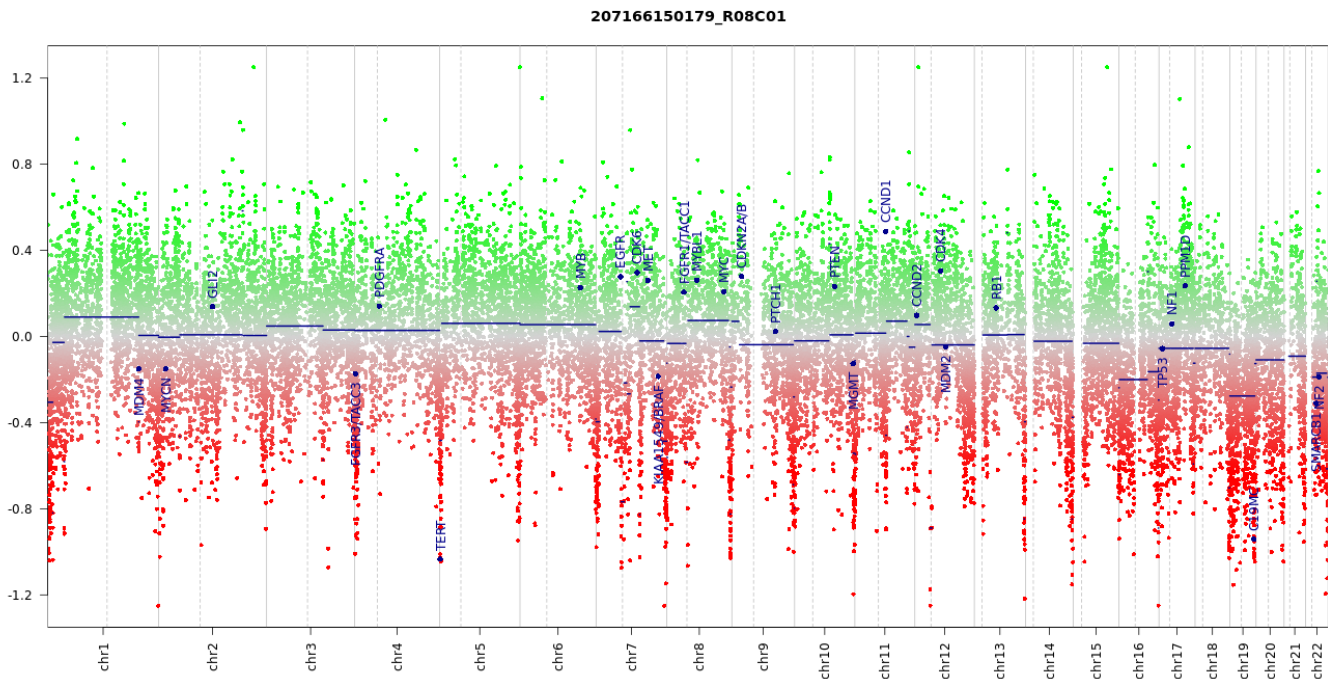

Depiction of chromosome 1 to 22 (and X/Y if automatic prediction was successful). Gains/amplifications represent positive, losses negative deviations from the baseline. 29 brain tumor relevant gene regions are highlighted for easier assessment. (see Hovestadt & Zapatka, <http://www.bioconductor.org/packages/devel/bioc/html/conumee.html>)

## MGMT promotor methylation (MGMT-STP27)

MGMT promotor status prediction

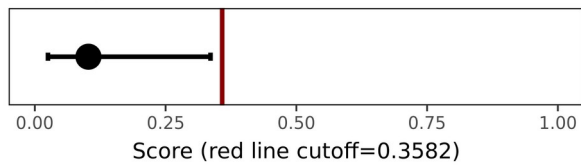

| Status       | Estimated | CI lower | CI upper |
|--------------|-----------|----------|----------|
| unmethylated | 0.10250   | 0.02513  | 0.33594  |

(see Bady et al, J Mol Diagn 2016; 18(3):350-61)



## Disclaimer

Classification using methylation profiling is a tool for research use only, it is not verified and has not been clinically validated and, therefore, must not be used for diagnostic purposes. This tool is not HIPAA compliant.

## Run information

**Report:** report\_website\_mnp\_brain\_v12.5\_sample (Version 1.0)

### Task version:

| Task                                    | Version |
|-----------------------------------------|---------|
| idat_preprocess                         | 2.0.1   |
| idat_qc                                 | 2.0.1   |
| idat_predictBrain                       | 2.0.1   |
| idat_rs_gender                          | 2.0.1   |
| idat_cnvp                               | 3.0.1   |
| idat_mgmt                               | 2.0.1   |
| report_website_mnp_brain_v11b4_research | 2.1     |
| report_website_mnp_brain_v11b4_sample   | 2.1     |
| idat_predictBrain                       | 12.5    |
| report_website_mnp_brain_v12.5_sample   | 1.0     |

# Methylation profiling report

## Supplier information

Sample identifier: 207166150179\_R05C01  
Sentry ID: 207166150179\_R05C01  
Material type: NA  
Gender: NA  
Supplier diagnosis: MEN-25(1)-T

| Automatic prediction |                                                                                                                                                                                                                            |
|----------------------|----------------------------------------------------------------------------------------------------------------------------------------------------------------------------------------------------------------------------|
| Array type:          | EPIC                                                                                                                                                                                                                       |
| Material type:       | DNA-FFPE <span style="color: red;">✗</span>                                                                                                                                                                                |
| Gender:              | female <span style="color: orange;">!</span>                                                                                                                                                                               |
| Legend:              | <span style="color: green;">✓</span> Ok <span style="color: orange;">!</span> Supplier information or prediction not available <span style="color: red;">✗</span> Warning, mismatch of prediction and supplier information |

## Brain tumor classifier results (12.5)

| Methylation classes<br>(Highest level $\geq 0.3$ , lower levels $\geq 0.1$ , all of lowest level) |                                                   | Calibrated score | Interpretation |                                      |
|---------------------------------------------------------------------------------------------------|---------------------------------------------------|------------------|----------------|--------------------------------------|
| Meningioma                                                                                        |                                                   | 0.99             | match          | <span style="color: green;">✓</span> |
|                                                                                                   | Meningioma                                        | 0.99             | match          | <span style="color: green;">✓</span> |
|                                                                                                   | Meningioma, Benign                                | 0.99             | match          | <span style="color: green;">✓</span> |
|                                                                                                   | Mc Meningioma, Subtype Benign, Subclass 1 (novel) | 0.99             | match          | <span style="color: green;">✓</span> |
|                                                                                                   | Mc Meningioma, Subtype Benign, Subclass 3 (novel) | 0.00             | no match       | <span style="color: red;">✗</span>   |
|                                                                                                   | Mc Meningioma, Subtype Benign, Subclass 2 (novel) | 0.00             | no match       | <span style="color: red;">✗</span>   |

Legend: ✓ Match (score  $\geq 0.9$ )    ✗ No match (score  $< 0.9$ ): possibly still relevant for low tumor content and low DNA quality cases.    ● Match to MC family member (score  $\geq 0.5$ )

## Class descriptions

**MC Meningioma, subtype benign, subclass 1 (novel):** The "mc Meningioma benign" comprises meningiomas epigenetically in one of the groups benign-1, 2 or 3. Subclass benign-1 cases typically show 22q deletions/NF2 mutations and rarely other mutations or CNVs. Histology is mostly but not exclusively fibroblastic, psammomatous or transitional. Subclass benign-2 cases typically show AKT1/TRAF7, KLF4/TRAF7 or SMO mutations and rarely other mutations or CNVs. Histology is mostly meningeothelial (then typically AKT1 mutant) or secretory (KLF4 mutant). Subclass benign-3 cases typically show trisomy 5, other trisomies, and can show 22q deletions/NF2 mutations and rarely other mutations or CNVs. Histology is mostly but not exclusively angiomatous, metaplastic, or microcytic. Prognosis in this mc is typically favourable, similar to WHO grade 1. Integration of meningioma subclasses into the brain tumor classifier is under development, thus, the specific meningioma classifier should be consulted in parallel. Integration of histology, methylation and CNVs can further increase prognostic accuracy.

**MC Meningioma, subtype benign, subclass 3 (novel):** The "mc Meningioma benign" comprises meningiomas epigenetically in one of the groups benign-1, 2 or 3. Subclass benign-1 cases typically show 22q deletions/NF2 mutations and rarely other mutations or CNVs. Histology is mostly but not exclusively fibroblastic, psammomatous or transitional. Subclass benign-2 cases typically show AKT1/TRAF7, KLF4/TRAF7 or SMO mutations and rarely other mutations or CNVs. Histology is mostly meningeothelial (then typically AKT1 mutant) or secretory (KLF4 mutant). Subclass benign-3 cases typically show trisomy 5, other trisomies, and can show 22q deletions/NF2 mutations and rarely other mutations or CNVs. Histology is mostly but not exclusively angiomatous, metaplastic, or microcytic. Prognosis in this mc is typically favourable, similar to WHO grade 1. Integration of meningioma subclasses into the brain tumor classifier is under development, thus, the specific meningioma classifier should be consulted in parallel. Integration of histology, methylation and CNVs can further increase prognostic accuracy.

**MC Meningioma, subtype benign, subclass 2 (novel):** The "mc Meningioma benign" comprises meningiomas epigenetically in one of the groups benign-1, 2 or 3. Subclass benign-1 cases typically show 22q deletions/NF2 mutations and rarely other mutations or CNVs. Histology is mostly but not exclusively fibroblastic, psammomatous or transitional. Subclass benign-2 cases typically show AKT1/TRAF7, KLF4/TRAF7 or SMO mutations and rarely other mutations or CNVs. Histology is mostly meningeothelial (then typically AKT1 mutant) or secretory (KLF4 mutant). Subclass benign-3 cases typically show trisomy 5, other trisomies, and can show 22q deletions/NF2 mutations and rarely other mutations or CNVs. Histology is mostly but not exclusively angiomatous, metaplastic, or microcytic. Prognosis in this mc is typically favourable, similar to WHO grade 1. Integration of meningioma subclasses into the brain tumor classifier is under development, thus, the specific meningioma classifier should be consulted in parallel.

Integration of histology, methylation and CNVs can further increase prognostic accuracy.

## Copy number variation profile

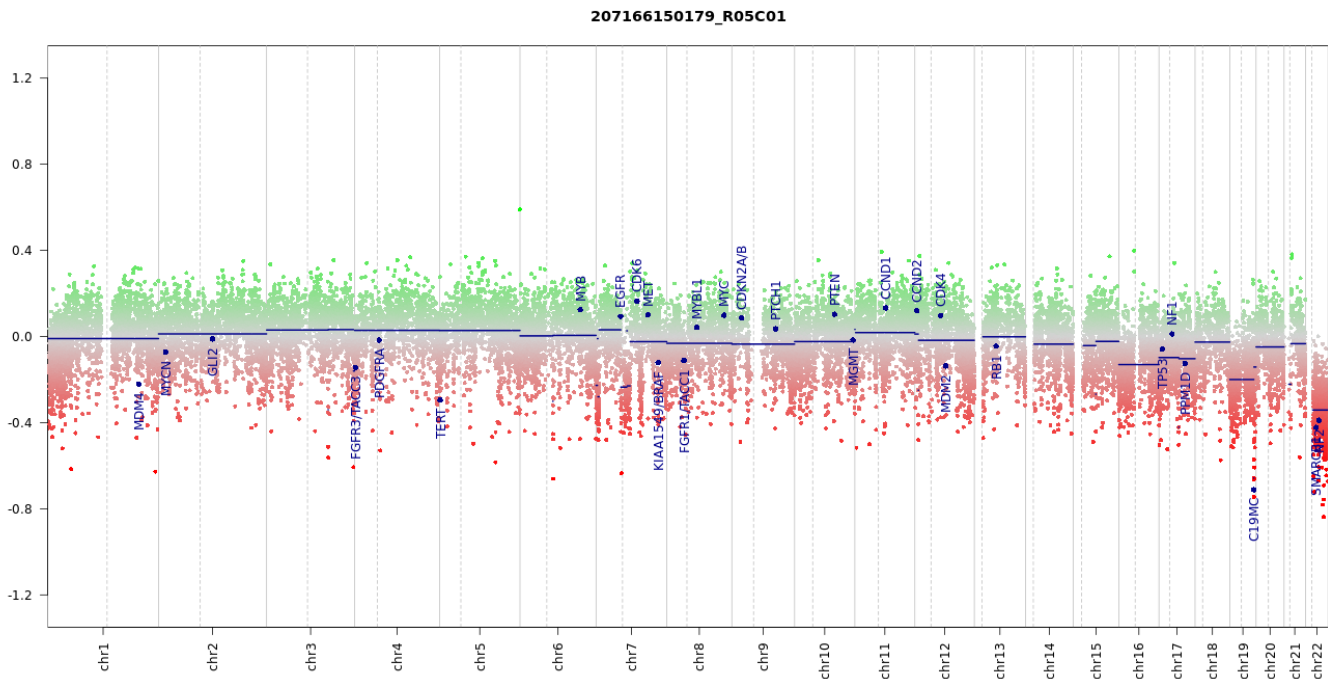

## MGMT promotor methylation (MGMT-STP27)

MGMT promotor status prediction

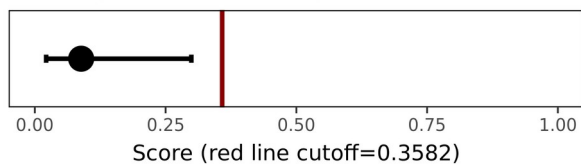

| Status       | Estimated | CI lower | CI upper |
|--------------|-----------|----------|----------|
| unmethylated | 0.08858   | 0.02165  | 0.29919  |

(see Bady et al, J Mol Diagn 2016; 18(3):350-61)

## Disclaimer

Classification using methylation profiling is a tool for research use only, it is not verified and has not been clinically validated and, therefore, must not be used for diagnostic purposes. This tool is not HIPAA compliant.

## Run information

**Report:** report\_website\_mnp\_brain\_v12.5\_sample (Version 1.0)

### Task version:

| Task                                    | Version |
|-----------------------------------------|---------|
| idat_preprocess                         | 2.0.1   |
| idat_qc                                 | 2.0.1   |
| idat_predictBrain                       | 2.0.1   |
| idat_rs_gender                          | 2.0.1   |
| idat_cnvp                               | 3.0.1   |
| idat_mgmt                               | 2.0.1   |
| report_website_mnp_brain_v11b4_research | 2.1     |
| report_website_mnp_brain_v11b4_sample   | 2.1     |
| idat_predictBrain                       | 12.5    |
| report_website_mnp_brain_v12.5_sample   | 1.0     |

# Methylation profiling report

## Supplier information

Sample identifier: 207166150179\_R06C01  
Sentry ID: 207166150179\_R06C01  
Material type: NA  
Gender: NA  
Supplier diagnosis: MEN-25(1)-X

| Automatic prediction |                                                                                                                                                                                                                            |
|----------------------|----------------------------------------------------------------------------------------------------------------------------------------------------------------------------------------------------------------------------|
| Array type:          | EPIC                                                                                                                                                                                                                       |
| Material type:       | DNA-FFPE <span style="color: red;">✗</span>                                                                                                                                                                                |
| Gender:              | male <span style="color: yellow;">!</span>                                                                                                                                                                                 |
| Legend:              | <span style="color: green;">✓</span> Ok <span style="color: yellow;">!</span> Supplier information or prediction not available <span style="color: red;">✗</span> Warning, mismatch of prediction and supplier information |

## Brain tumor classifier results (12.5)

| Methylation classes<br>(Highest level $\geq 0.3$ , lower levels $\geq 0.1$ , all of lowest level) |                                                   | Calibrated score | Interpretation |   |
|---------------------------------------------------------------------------------------------------|---------------------------------------------------|------------------|----------------|---|
| Meningioma                                                                                        |                                                   | 0.67             | no match       | ✗ |
|                                                                                                   | Meningioma                                        | 0.67             | no match       | ✗ |
|                                                                                                   | Meningioma, Benign                                | 0.54             | no match       | ✗ |
|                                                                                                   | Mc Meningioma, Subtype Benign, Subclass 3 (novel) | 0.50             | no match       | ✗ |
|                                                                                                   | Mc Meningioma, Subtype Benign, Subclass 1 (novel) | 0.02             | no match       | ✗ |
|                                                                                                   | Mc Meningioma, Subtype Benign, Subclass 2 (novel) | 0.00             | no match       | ✗ |
|                                                                                                   | Meningioma, Malignant                             | 0.11             | no match       | ✗ |
|                                                                                                   | Mc Meningioma, Subtype Malignant (novel)          | 0.11             | no match       | ✗ |

Legend: ✓ Match (score  $\geq 0.9$ )     ✗ No match (score  $< 0.9$ ): possibly still relevant for low tumor content and low DNA quality cases.     ● Match to MC family member (score  $\geq 0.5$ )

## Class descriptions

**MC Meningioma, subtype benign, subclass 3 (novel):** The "mc Meningioma benign" comprises meningiomas epigenetically in one of the groups benign-1, 2 or 3. Subclass benign-1 cases typically show 22q deletions/NF2 mutations and rarely other mutations or CNVs. Histology is mostly but not exclusively fibroblastic, psammomatous or transitional. Subclass benign-2 cases typically show AKT1/TRAF7, KLF4/TRAF7 or SMO mutations and rarely other mutations or CNVs. Histology is mostly meningothelial (then typically AKT1 mutant) or secretory (KLF4 mutant). Subclass benign-3 cases typically show trisomy 5, other trisomies, and can show 22q deletions/NF2 mutations and rarely other mutations or CNVs. Histology is mostly but not exclusively angiomatous, metaplastic, or microcytic. Prognosis in this mc is typically favourable, similar to WHO grade 1. Integration of meningioma subclasses into the brain tumor classifier is under development, thus, the specific meningioma classifier should be consulted in parallel. Integration of histology, methylation and CNVs can further increase prognostic accuracy.

**MC Meningioma, subtype benign, subclass 1 (novel):** The "mc Meningioma benign" comprises meningiomas epigenetically in one of the groups benign-1, 2 or 3. Subclass benign-1 cases typically show 22q deletions/NF2 mutations and rarely other mutations or CNVs. Histology is mostly but not exclusively fibroblastic, psammomatous or transitional. Subclass benign-2 cases typically show AKT1/TRAF7, KLF4/TRAF7 or SMO mutations and rarely other mutations or CNVs. Histology is mostly meningothelial (then typically AKT1 mutant) or secretory (KLF4 mutant). Subclass benign-3 cases typically show trisomy 5, other trisomies, and can show 22q deletions/NF2 mutations and rarely other mutations or CNVs. Histology is mostly but not exclusively angiomatous, metaplastic, or microcytic. Prognosis in this mc is typically favourable, similar to WHO grade 1. Integration of meningioma subclasses into the brain tumor classifier is under development, thus, the specific meningioma classifier should be consulted in parallel. Integration of histology, methylation and CNVs can further increase prognostic accuracy.

**MC Meningioma, subtype benign, subclass 2 (novel):** The "mc Meningioma benign" comprises meningiomas epigenetically in one of the groups benign-1, 2 or 3. Subclass

benign-1 cases typically show 22q deletions/NF2 mutations and rarely other mutations or CNVs. Histology is mostly but not exclusively fibroblastic, psammomatous or transitional. Subclass benign-2 cases typically show AKT1/TRAF7, KLF4/TRAF7 or SMO mutations and rarely other mutations or CNVs. Histology is mostly meningothelial (then typically AKT1 mutant) or secretory (KLF4 mutant). Subclass benign-3 cases typically show trisomy 5, other trisomies, and can show 22q deletions/NF2 mutations and rarely other mutations or CNVs. Histology is mostly but not exclusively angiomatous, metaplastic, or microcytic. Prognosis in this mc is typically favourable, similar to WHO grade 1. Integration of meningioma subclasses into the brain tumor classifier is under development, thus, the specific meningioma classifier should be consulted in parallel. Integration of histology, methylation and CNVs can further increase prognostic accuracy.

## Copy number variation profile

207166150179\_R06C01

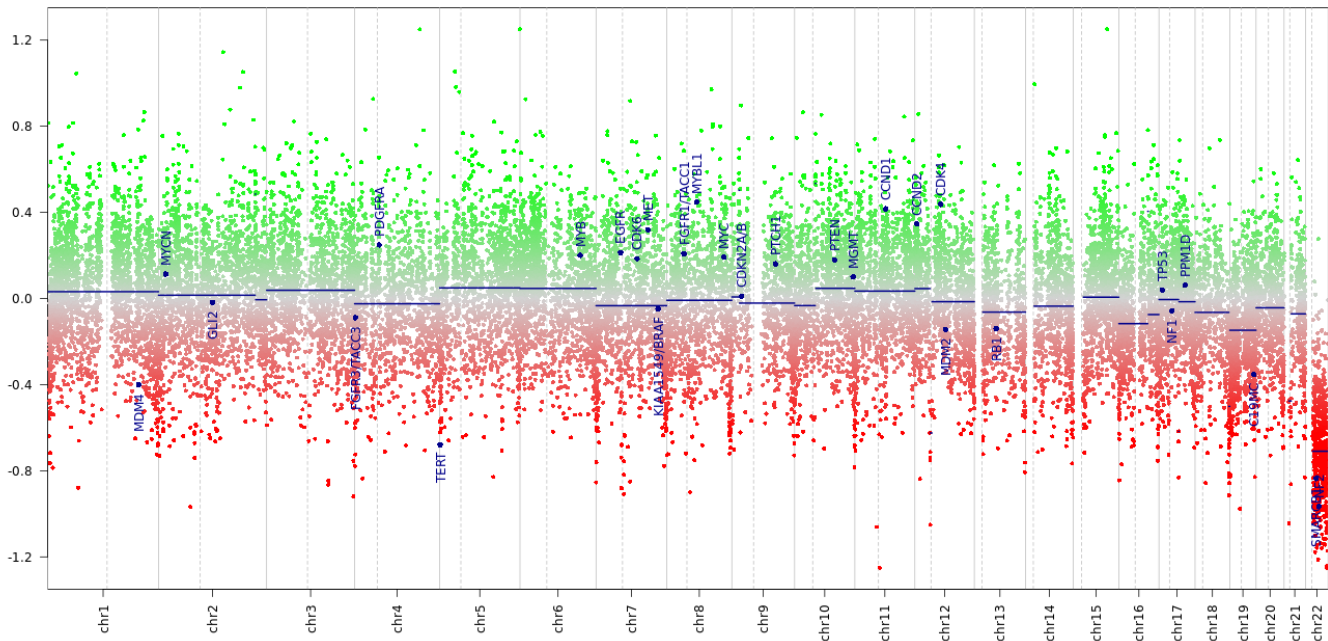

Depiction of chromosome 1 to 22 (and X/Y if automatic prediction was successful). Gains/amplifications represent positive, losses negative deviations from the baseline. 29 brain tumor relevant gene regions are highlighted for easier assessment. (see Hovestadt & Zapatka, <http://www.bioconductor.org/packages/devel/bioc/html/conumee.html>)

## MGMT promotor methylation (MGMT-STP27)

MGMT promotor status prediction

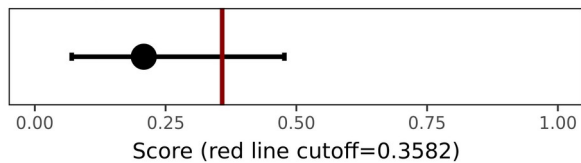

| Status       | Estimated | CI lower | CI upper |
|--------------|-----------|----------|----------|
| unmethylated | 0.20833   | 0.07053  | 0.47714  |

(see Bady et al, J Mol Diagn 2016; 18(3):350-61)



## Disclaimer

Classification using methylation profiling is a tool for research use only, it is not verified and has not been clinically validated and, therefore, must not be used for diagnostic purposes. This tool is not HIPAA compliant.

## Run information

**Report:** report\_website\_mnp\_brain\_v12.5\_sample (Version 1.0)

### Task version:

| Task                                    | Version |
|-----------------------------------------|---------|
| idat_preprocess                         | 2.0.1   |
| idat_qc                                 | 2.0.1   |
| idat_predictBrain                       | 2.0.1   |
| idat_rs_gender                          | 2.0.1   |
| idat_cnvp                               | 3.0.1   |
| idat_mgmt                               | 2.0.1   |
| report_website_mnp_brain_v11b4_research | 2.1     |
| report_website_mnp_brain_v11b4_sample   | 2.1     |
| idat_predictBrain                       | 12.5    |
| report_website_mnp_brain_v12.5_sample   | 1.0     |

# Methylation profiling report

## Supplier information

Sample identifier: 207166150100\_R07C01  
Sentry ID: 207166150100\_R07C01  
Material type: NA  
Gender: male  
Supplier diagnosis: MEN-4-T

| Automatic prediction |                                                                                                                                                                                                                                                                                                                                                                       |   |
|----------------------|-----------------------------------------------------------------------------------------------------------------------------------------------------------------------------------------------------------------------------------------------------------------------------------------------------------------------------------------------------------------------|---|
| Array type:          | EPIC                                                                                                                                                                                                                                                                                                                                                                  |   |
| Material type:       | DNA-FFPE                                                                                                                                                                                                                                                                                                                                                              | ✗ |
| Gender:              | female                                                                                                                                                                                                                                                                                                                                                                | ✗ |
| Legend:              |  Ok  Supplier information or prediction not available  Warning, mismatch of prediction and supplier information |   |

## Brain tumor classifier results (12.5)

| Methylation classes<br>(Highest level $\geq 0.3$ , lower levels $\geq 0.1$ , all of lowest level) |                                                   |  | Calibrated score | Interpretation |                                                                                       |
|---------------------------------------------------------------------------------------------------|---------------------------------------------------|--|------------------|----------------|---------------------------------------------------------------------------------------|
| Meningioma                                                                                        |                                                   |  | 0.99             | match          |    |
|                                                                                                   | Meningioma                                        |  | 0.99             | match          |   |
|                                                                                                   | Meningioma, Benign                                |  | 0.99             | match          |  |
|                                                                                                   | Mc Meningioma, Subtype Benign, Subclass 3 (novel) |  | 0.96             | match          |  |
|                                                                                                   | Mc Meningioma, Subtype Benign, Subclass 2 (novel) |  | 0.01             | no match       | ✗                                                                                     |
|                                                                                                   | Mc Meningioma, Subtype Benign, Subclass 1 (novel) |  | 0.01             | no match       | ✗                                                                                     |

Legend:  Match (score  $\geq 0.9$ )  No match (score  $< 0.9$ ): possibly still relevant for low tumor content and low DNA quality cases.  Match to MC family member (score  $\geq 0.5$ )

## Class descriptions

**MC Meningioma, subtype benign, subclass 3 (novel):** The "mc Meningioma benign" comprises meningiomas epigenetically in one of the groups benign-1, 2 or 3. Subclass benign-1 cases typically show 22q deletions/NF2 mutations and rarely other mutations or CNVs. Histology is mostly but not exclusively fibroblastic, psammomatous or transitional. Subclass benign-2 cases typically show AKT1/TRAF7, KLF4/TRAF7 or SMO mutations and rarely other mutations or CNVs. Histology is mostly meningothelial (then typically AKT1 mutant) or secretory (KLF4 mutant). Subclass benign-3 cases typically show trisomy 5, other trisomies, and can show 22q deletions/NF2 mutations and rarely other mutations or CNVs. Histology is mostly but not exclusively angiomatous, metaplastic, or microcytic. Prognosis in this mc is typically favourable, similar to WHO grade 1. Integration of meningioma subclasses into the brain tumor classifier is under development, thus, the specific meningioma classifier should be consulted in parallel. Integration of histology, methylation and CNVs can further increase prognostic accuracy.

**MC Meningioma, subtype benign, subclass 2 (novel):** The "mc Meningioma benign" comprises meningiomas epigenetically in one of the groups benign-1, 2 or 3. Subclass benign-1 cases typically show 22q deletions/NF2 mutations and rarely other mutations or CNVs. Histology is mostly but not exclusively fibroblastic, psammomatous or transitional. Subclass benign-2 cases typically show AKT1/TRAF7, KLF4/TRAF7 or SMO mutations and rarely other mutations or CNVs. Histology is mostly meningothelial (then typically AKT1 mutant) or secretory (KLF4 mutant). Subclass benign-3 cases typically show trisomy 5, other trisomies, and can show 22q deletions/NF2 mutations and rarely other mutations or CNVs. Histology is mostly but not exclusively angiomatous, metaplastic, or microcytic. Prognosis in this mc is typically favourable, similar to WHO grade 1. Integration of meningioma subclasses into the brain tumor classifier is under development, thus, the specific meningioma classifier should be consulted in parallel. Integration of histology, methylation and CNVs can further increase prognostic accuracy.

**MC Meningioma, subtype benign, subclass 1 (novel):** The "mc Meningioma benign" comprises meningiomas epigenetically in one of the groups benign-1, 2 or 3. Subclass benign-1 cases typically show 22q deletions/NF2 mutations and rarely other mutations or CNVs. Histology is mostly but not exclusively fibroblastic, psammomatous or transitional. Subclass benign-2 cases typically show AKT1/TRAF7, KLF4/TRAF7 or SMO mutations and rarely other mutations or CNVs. Histology is mostly meningothelial (then typically AKT1 mutant) or secretory (KLF4 mutant). Subclass benign-3 cases typically show trisomy 5, other trisomies, and can show 22q deletions/NF2 mutations and rarely other mutations or CNVs. Histology is mostly but not exclusively angiomatous, metaplastic, or microcytic. Prognosis in this mc is typically favourable, similar to WHO grade 1. Integration of meningioma subclasses into the brain tumor classifier is under development, thus, the specific meningioma classifier should be consulted in parallel.

Integration of histology, methylation and CNVs can further increase prognostic accuracy.

## Copy number variation profile

207166150100\_R07C01

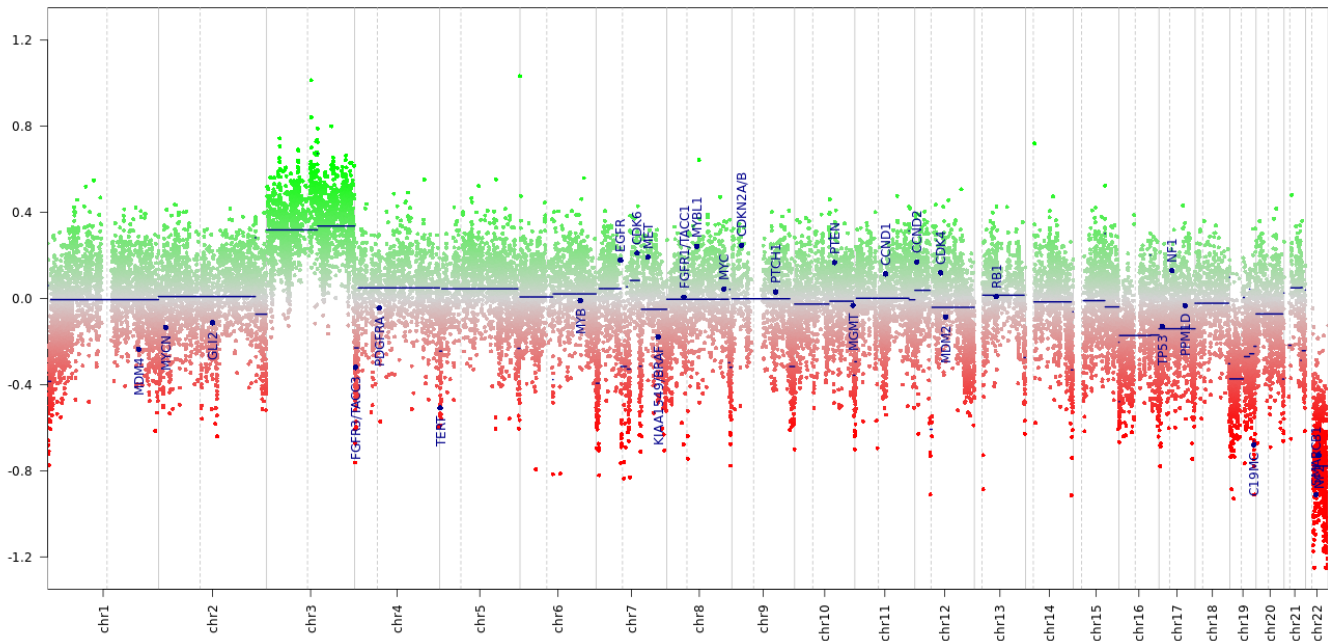

Depiction of chromosome 1 to 22 (and X/Y if automatic prediction was successful). Gains/amplifications represent positive, losses negative deviations from the baseline. 29 brain tumor relevant gene regions are highlighted for easier assessment. (see Hovestadt & Zapatka, <http://www.bioconductor.org/packages/devel/bioc/html/conumee.html>)

## MGMT promotor methylation (MGMT-STP27)

MGMT promotor status prediction

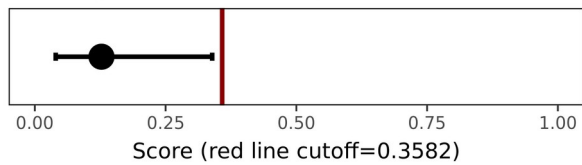

| Status       | Estimated | CI lower | CI upper |
|--------------|-----------|----------|----------|
| unmethylated | 0.12743   | 0.03991  | 0.33911  |

(see Bady et al, J Mol Diagn 2016; 18(3):350-61)

## Disclaimer

Classification using methylation profiling is a tool for research use only, it is not verified and has not been clinically validated and, therefore, must not be used for diagnostic purposes. This tool is not HIPAA compliant.

## Run information

**Report:** report\_website\_mnp\_brain\_v12.5\_sample (Version 1.0)

### Task version:

| Task                                    | Version |
|-----------------------------------------|---------|
| idat_preprocess                         | 2.0.1   |
| idat_qc                                 | 2.0.1   |
| idat_predictBrain                       | 2.0.1   |
| idat_rs_gender                          | 2.0.1   |
| idat_cnvp                               | 3.0.1   |
| idat_mgmt                               | 2.0.1   |
| report_website_mnp_brain_v11b4_research | 2.1     |
| report_website_mnp_brain_v11b4_sample   | 2.1     |
| idat_predictBrain                       | 12.5    |
| report_website_mnp_brain_v12.5_sample   | 1.0     |

## Methylation profiling report

### Supplier information

Sample identifier: 207166150100\_R08C01  
Sentry ID: 207166150100\_R08C01  
Material type: NA  
Gender: male  
Supplier diagnosis: MEN-4-X

| Automatic prediction |                                                                                                                                                                                                                            |   |
|----------------------|----------------------------------------------------------------------------------------------------------------------------------------------------------------------------------------------------------------------------|---|
| Array type:          | EPIC                                                                                                                                                                                                                       |   |
| Material type:       | DNA-FFPE                                                                                                                                                                                                                   | ✗ |
| Gender:              | female                                                                                                                                                                                                                     | ✗ |
| Legend:              | <span style="color: green;">✓</span> Ok <span style="color: orange;">⚠</span> Supplier information or prediction not available <span style="color: red;">✗</span> Warning, mismatch of prediction and supplier information |   |

### Brain tumor classifier results (12.5)

| Methylation classes<br>(Highest level $\geq 0.3$ , lower levels $\geq 0.1$ , all of lowest level) |                                                   | Calibrated score | Interpretation |   |
|---------------------------------------------------------------------------------------------------|---------------------------------------------------|------------------|----------------|---|
| Meningioma                                                                                        |                                                   | 0.86             | no match       | ✗ |
|                                                                                                   | Meningioma                                        | 0.86             | no match       | ✗ |
|                                                                                                   | Meningioma, Benign                                | 0.84             | no match       | ✗ |
|                                                                                                   | Mc Meningioma, Subtype Benign, Subclass 1 (novel) | 0.61             | no match       | ✗ |
|                                                                                                   | Mc Meningioma, Subtype Benign, Subclass 3 (novel) | 0.17             | no match       | ✗ |
|                                                                                                   | Mc Meningioma, Subtype Benign, Subclass 2 (novel) | 0.05             | no match       | ✗ |

Legend: ✓ Match (score  $\geq 0.9$ ) ✗ No match (score  $< 0.9$ ): possibly still relevant for low tumor content and low DNA quality cases. ● Match to MC family member (score  $\geq 0.5$ )

### Class descriptions

**MC Meningioma, subtype benign, subclass 1 (novel):** The "mc Meningioma benign" comprises meningiomas epigenetically in one of the groups benign-1, 2 or 3. Subclass benign-1 cases typically show 22q deletions/NF2 mutations and rarely other mutations or CNVs. Histology is mostly but not exclusively fibroblastic, psammomatous or transitional. Subclass benign-2 cases typically show AKT1/TRAF7, KLF4/TRAF7 or SMO mutations and rarely other mutations or CNVs. Histology is mostly meningeothelial (then typically AKT1 mutant) or secretory (KLF4 mutant). Subclass benign-3 cases typically show trisomy 5, other trisomies, and can show 22q deletions/NF2 mutations and rarely other mutations or CNVs. Histology is mostly but not exclusively angiomatous, metaplastic, or microcytic. Prognosis in this mc is typically favourable, similar to WHO grade 1. Integration of meningioma subclasses into the brain tumor classifier is under development, thus, the specific meningioma classifier should be consulted in parallel. Integration of histology, methylation and CNVs can further increase prognostic accuracy.

**MC Meningioma, subtype benign, subclass 3 (novel):** The "mc Meningioma benign" comprises meningiomas epigenetically in one of the groups benign-1, 2 or 3. Subclass benign-1 cases typically show 22q deletions/NF2 mutations and rarely other mutations or CNVs. Histology is mostly but not exclusively fibroblastic, psammomatous or transitional. Subclass benign-2 cases typically show AKT1/TRAF7, KLF4/TRAF7 or SMO mutations and rarely other mutations or CNVs. Histology is mostly meningeothelial (then typically AKT1 mutant) or secretory (KLF4 mutant). Subclass benign-3 cases typically show trisomy 5, other trisomies, and can show 22q deletions/NF2 mutations and rarely other mutations or CNVs. Histology is mostly but not exclusively angiomatous, metaplastic, or microcytic. Prognosis in this mc is typically favourable, similar to WHO grade 1. Integration of meningioma subclasses into the brain tumor classifier is under development, thus, the specific meningioma classifier should be consulted in parallel. Integration of histology, methylation and CNVs can further increase prognostic accuracy.

**MC Meningioma, subtype benign, subclass 2 (novel):** The "mc Meningioma benign" comprises meningiomas epigenetically in one of the groups benign-1, 2 or 3. Subclass benign-1 cases typically show 22q deletions/NF2 mutations and rarely other mutations or CNVs. Histology is mostly but not exclusively fibroblastic, psammomatous or transitional. Subclass benign-2 cases typically show AKT1/TRAF7, KLF4/TRAF7 or SMO mutations and rarely other mutations or CNVs. Histology is mostly meningeothelial (then typically AKT1 mutant) or secretory (KLF4 mutant). Subclass benign-3 cases typically show trisomy 5, other trisomies, and can show 22q deletions/NF2 mutations and rarely other mutations or CNVs. Histology is mostly but not exclusively angiomatous, metaplastic, or microcytic. Prognosis in this mc is typically favourable, similar to WHO grade 1. Integration of meningioma subclasses into the brain tumor classifier is under development, thus, the specific meningioma classifier should be consulted in parallel.

Integration of histology, methylation and CNVs can further increase prognostic accuracy.

## Copy number variation profile

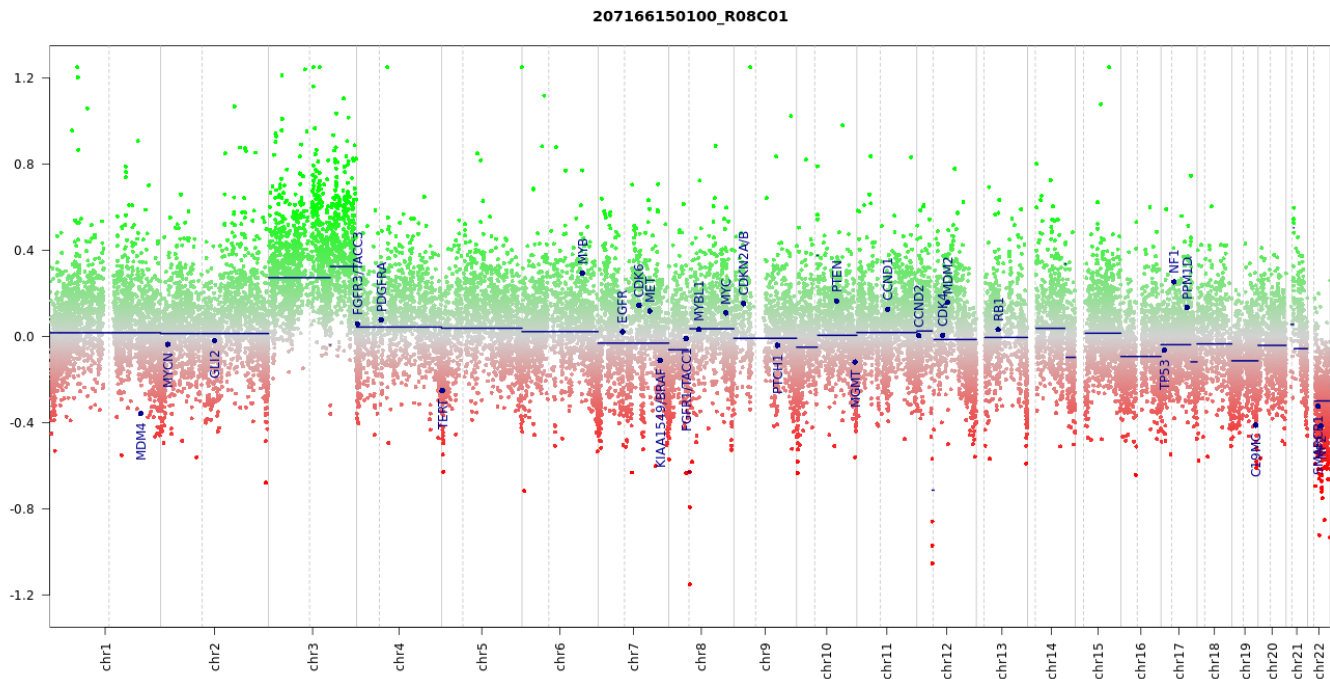

Depiction of chromosome 1 to 22 (and X/Y if automatic prediction was successful). Gains/amplifications represent positive, losses negative deviations from the baseline. 29 brain tumor relevant gene regions are highlighted for easier assessment. (see Hovestadt & Zapatka, <http://www.bioconductor.org/packages/devel/bioc/html/conumee.html>)

## MGMT promotor methylation (MGMT-STP27)

MGMT promotor status prediction

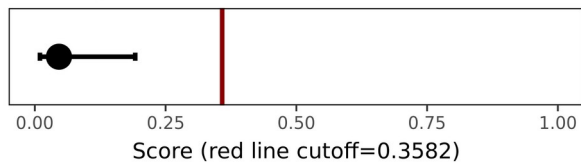

| Status       | Estimated | CI lower | CI upper |
|--------------|-----------|----------|----------|
| unmethylated | 0.04615   | 0.00976  | 0.19192  |

(see Bady et al, J Mol Diagn 2016; 18(3):350-61)



## Disclaimer

Classification using methylation profiling is a tool for research use only, it is not verified and has not been clinically validated and, therefore, must not be used for diagnostic purposes. This tool is not HIPAA compliant.

## Run information

**Report:** report\_website\_mnp\_brain\_v12.5\_sample (Version 1.0)

### Task version:

| Task                                    | Version |
|-----------------------------------------|---------|
| idat_preprocess                         | 2.0.1   |
| idat_qc                                 | 2.0.1   |
| idat_predictBrain                       | 2.0.1   |
| idat_rs_gender                          | 2.0.1   |
| idat_cnvp                               | 3.0.1   |
| idat_mgmt                               | 2.0.1   |
| report_website_mnp_brain_v11b4_research | 2.1     |
| report_website_mnp_brain_v11b4_sample   | 2.1     |
| idat_predictBrain                       | 12.5    |
| report_website_mnp_brain_v12.5_sample   | 1.0     |
