# Supplementary material for: Orthotopic meningioma rat model exhibits morphological and immunohistochemical congruency and epigenetic concordance with benign primary patient-derived tumors
Source: PubMed Central journal article supplement — Sci Rep. 2024 Dec 30;14:31933. doi: 10.1038/s41598-024-83456-7 (PMC11686083; doi:10.1038/s41598-024-83456-7), 2024-12-30
Supplement: 41598_2024_83456_MOESM7_ESM.pdf [file 41598_2024_83456_MOESM7_ESM.pdf]

## **Supplemental Material 9 – *in vitro* assessments**

**MEN-4**

**EMA**

**10x**

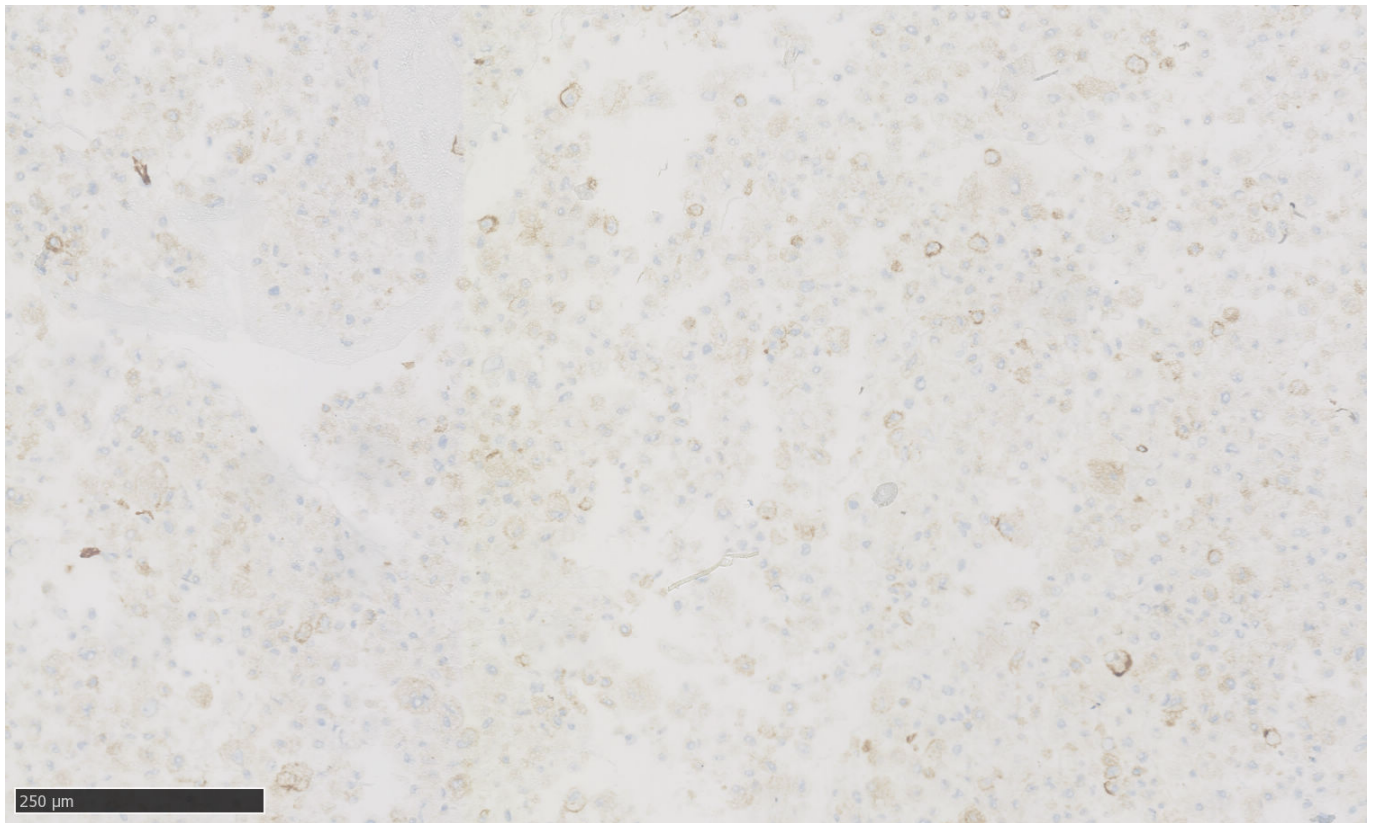

**40x**

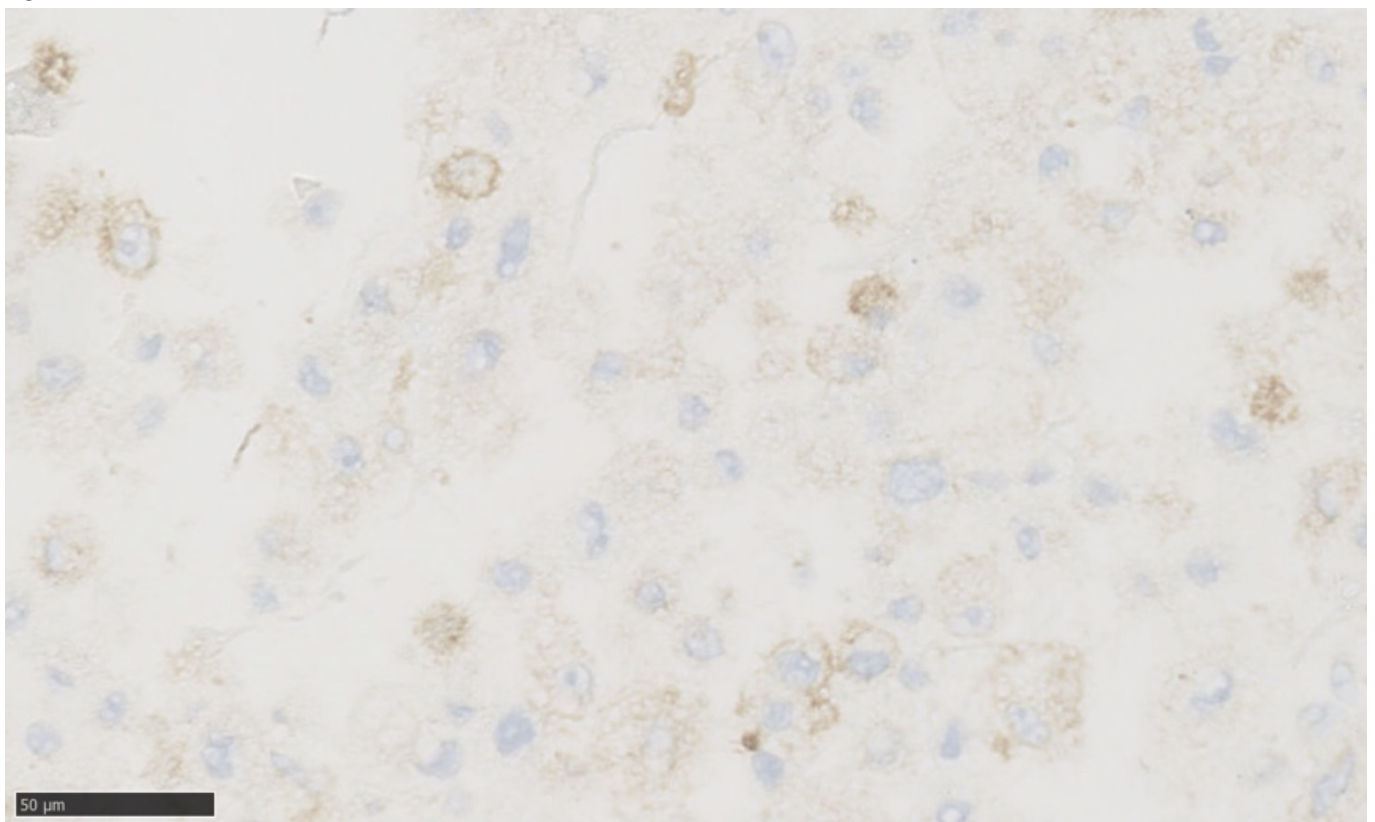

|           |   |
|-----------|---|
| JKP       | 1 |
| MWN       | 1 |
| Consensus | 1 |

SSTR2

10x

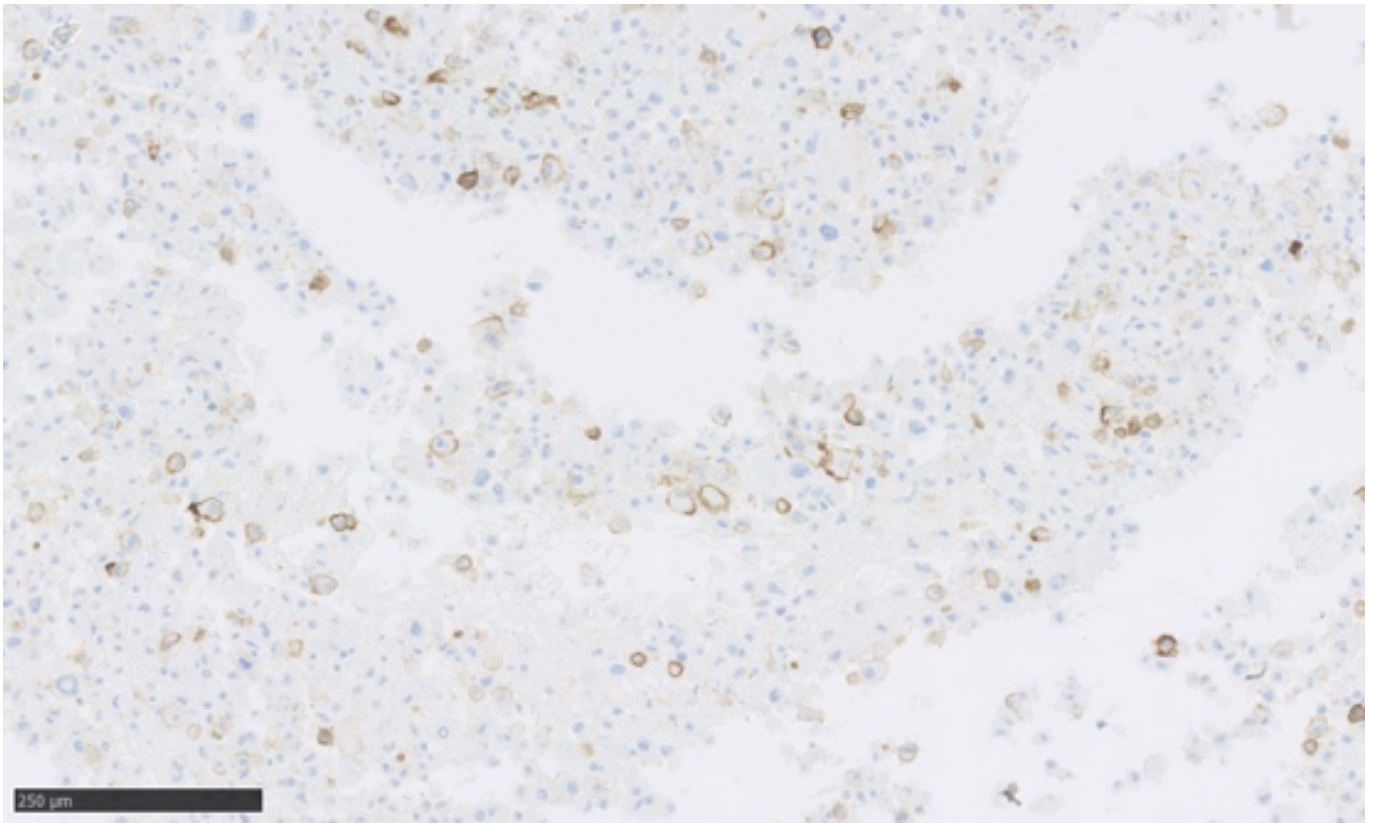

40x

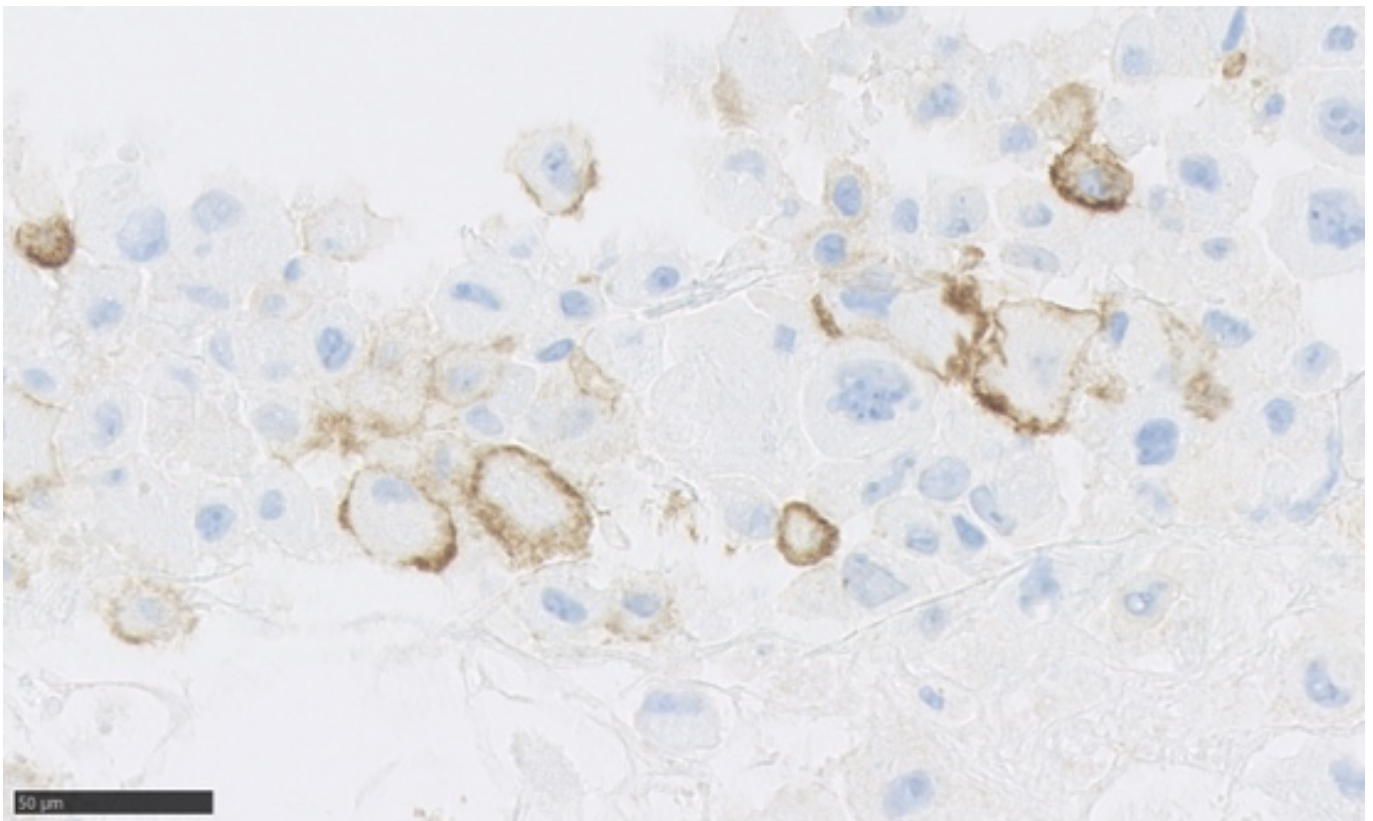

|           |     |
|-----------|-----|
| JKP       | 1   |
| MWN       | 2   |
| Consensus | 1-2 |

PR  
10x

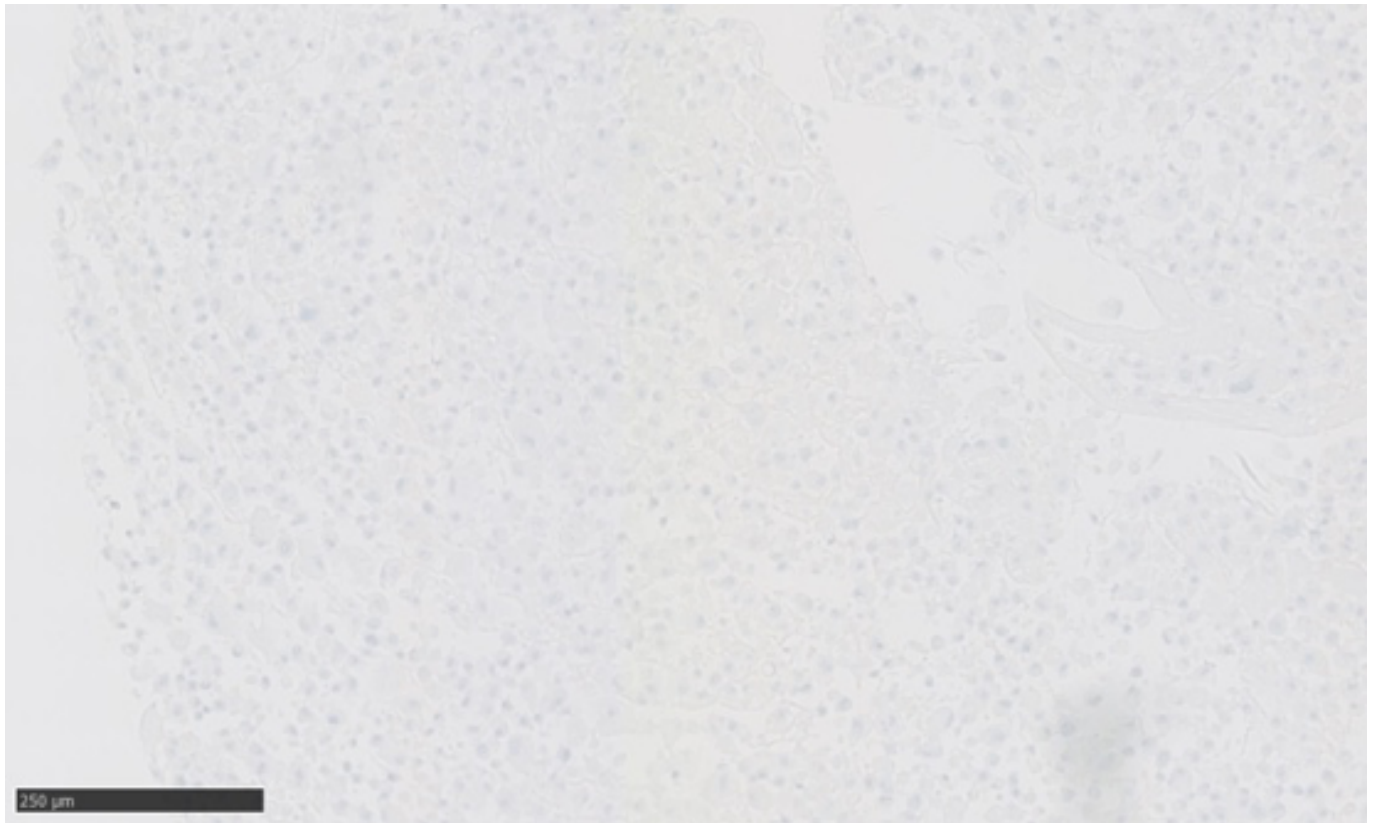

40x

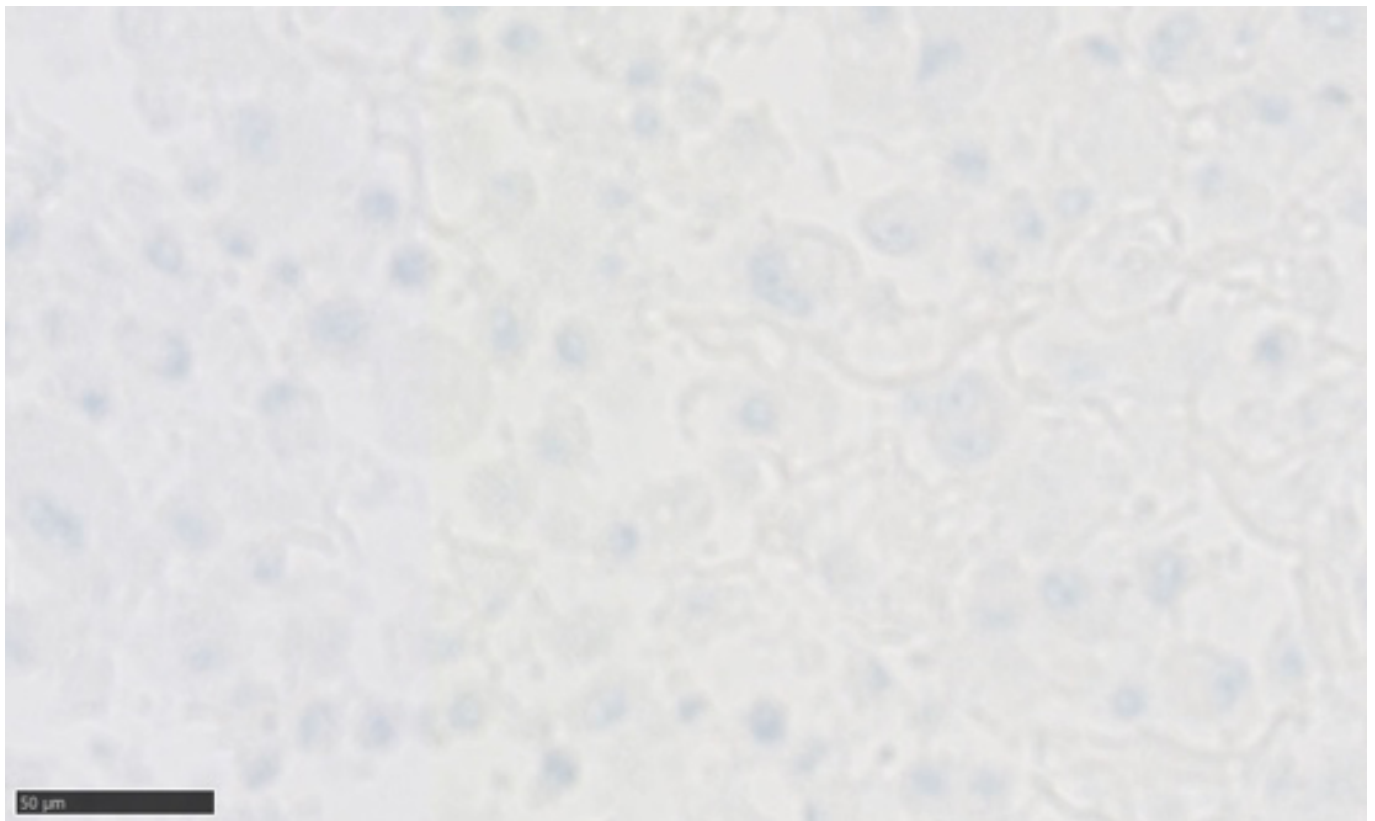

|           |   |
|-----------|---|
| JKP       | 0 |
| MWN       | 0 |
| Consensus | 0 |

# GFAP

10x

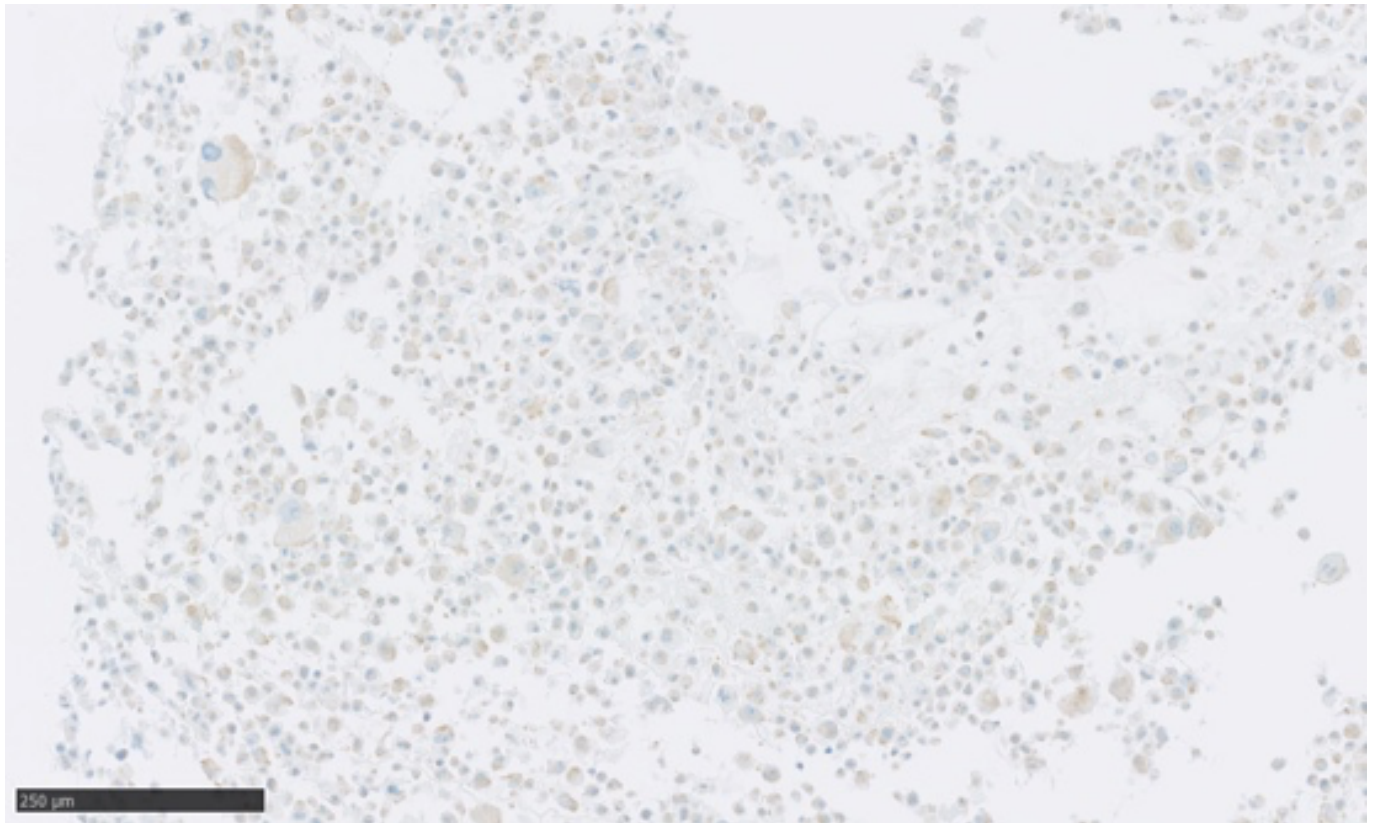

40x

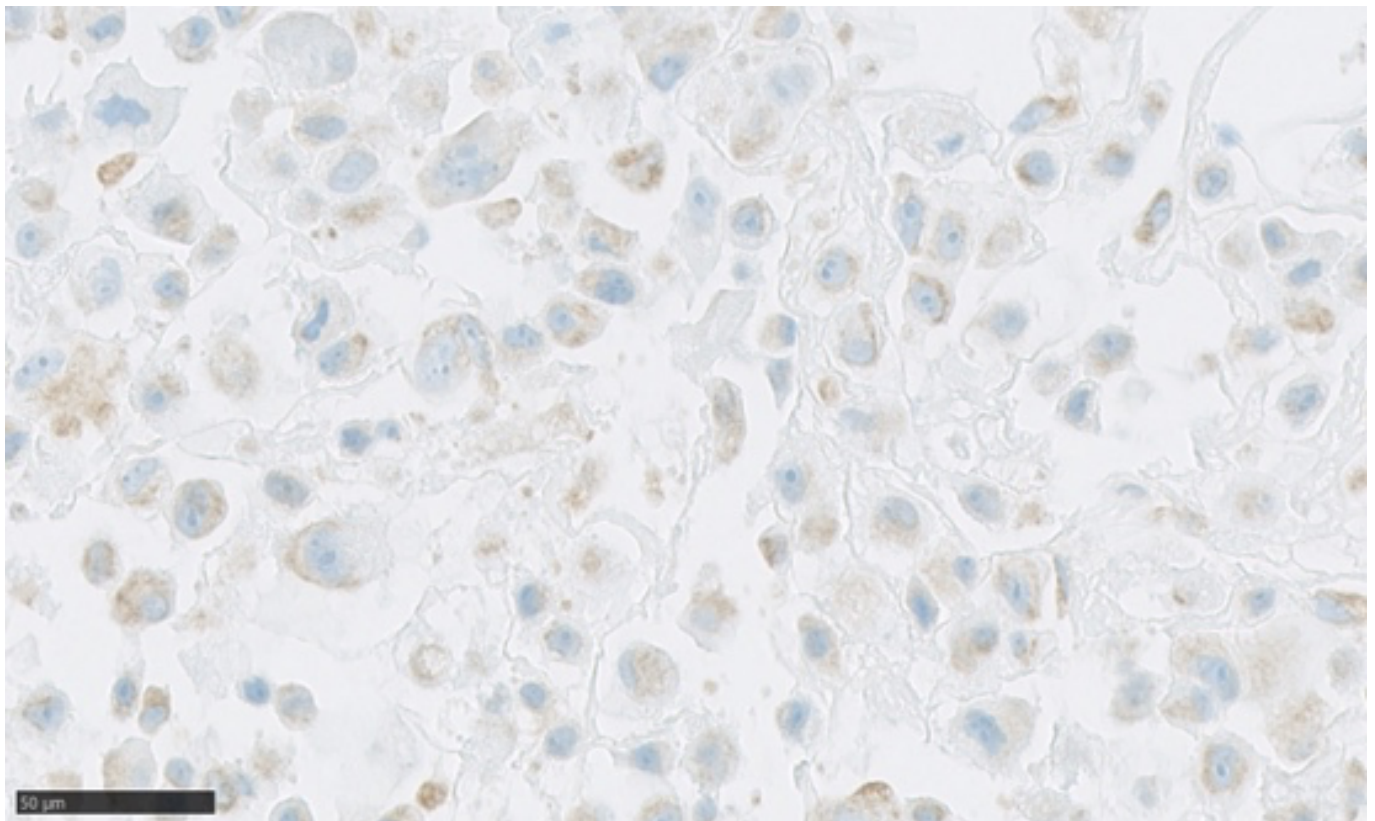

|           |      |
|-----------|------|
| JKP       | US/0 |
| MWN       | US/1 |
| Consensus | US   |

KI67

10x

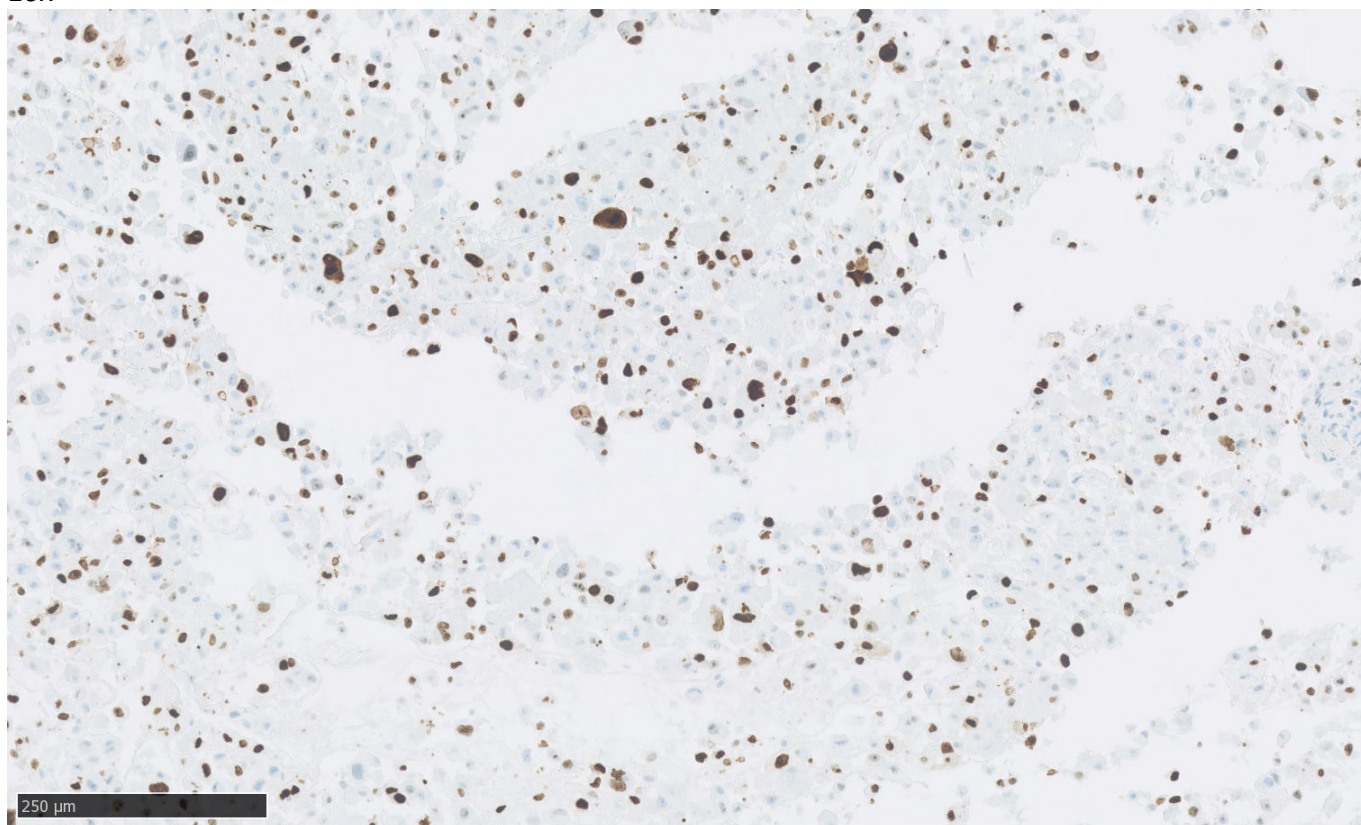

40x

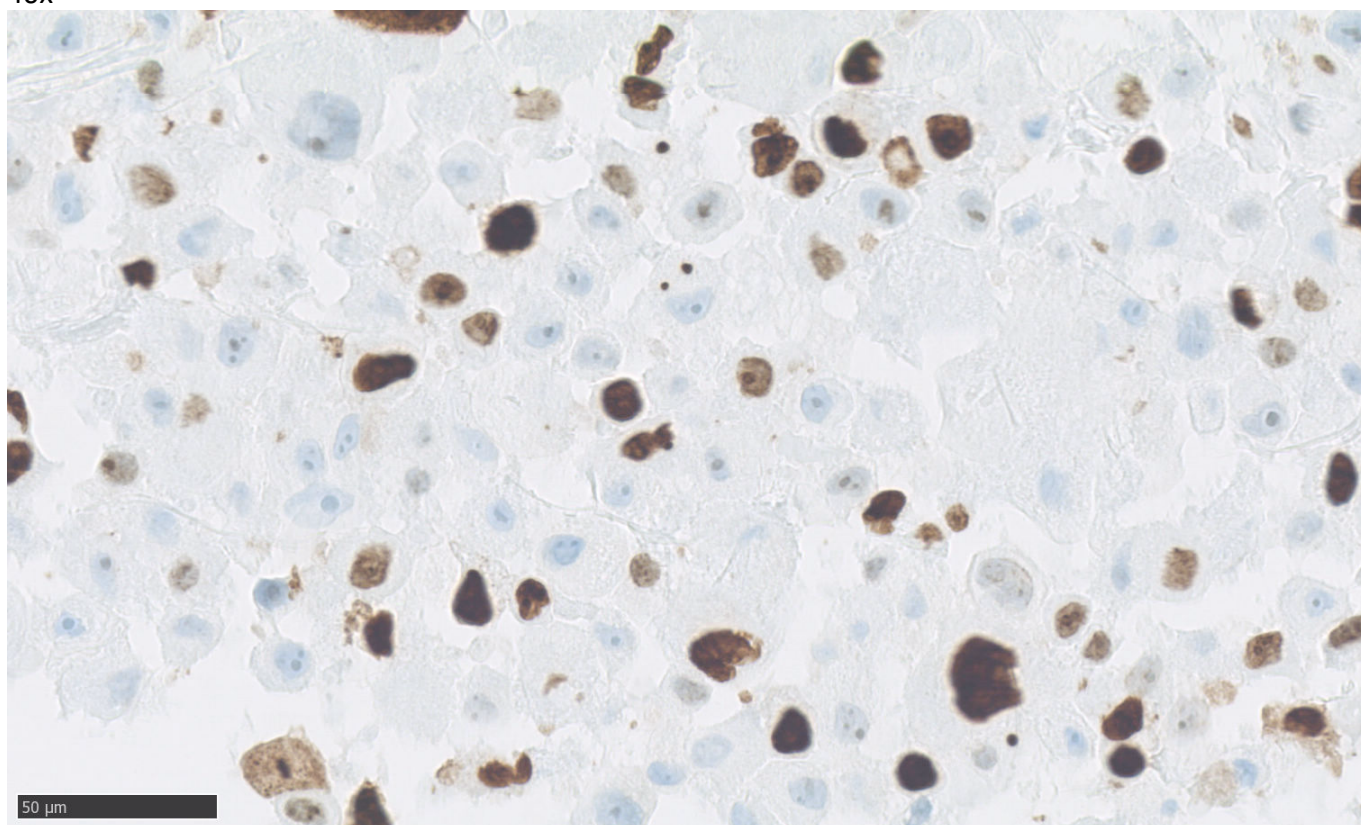

|           |     |
|-----------|-----|
| JKP       | 30% |
| MWN       | 30% |
| Consensus | 30% |

# MEN-12

EMA

10x

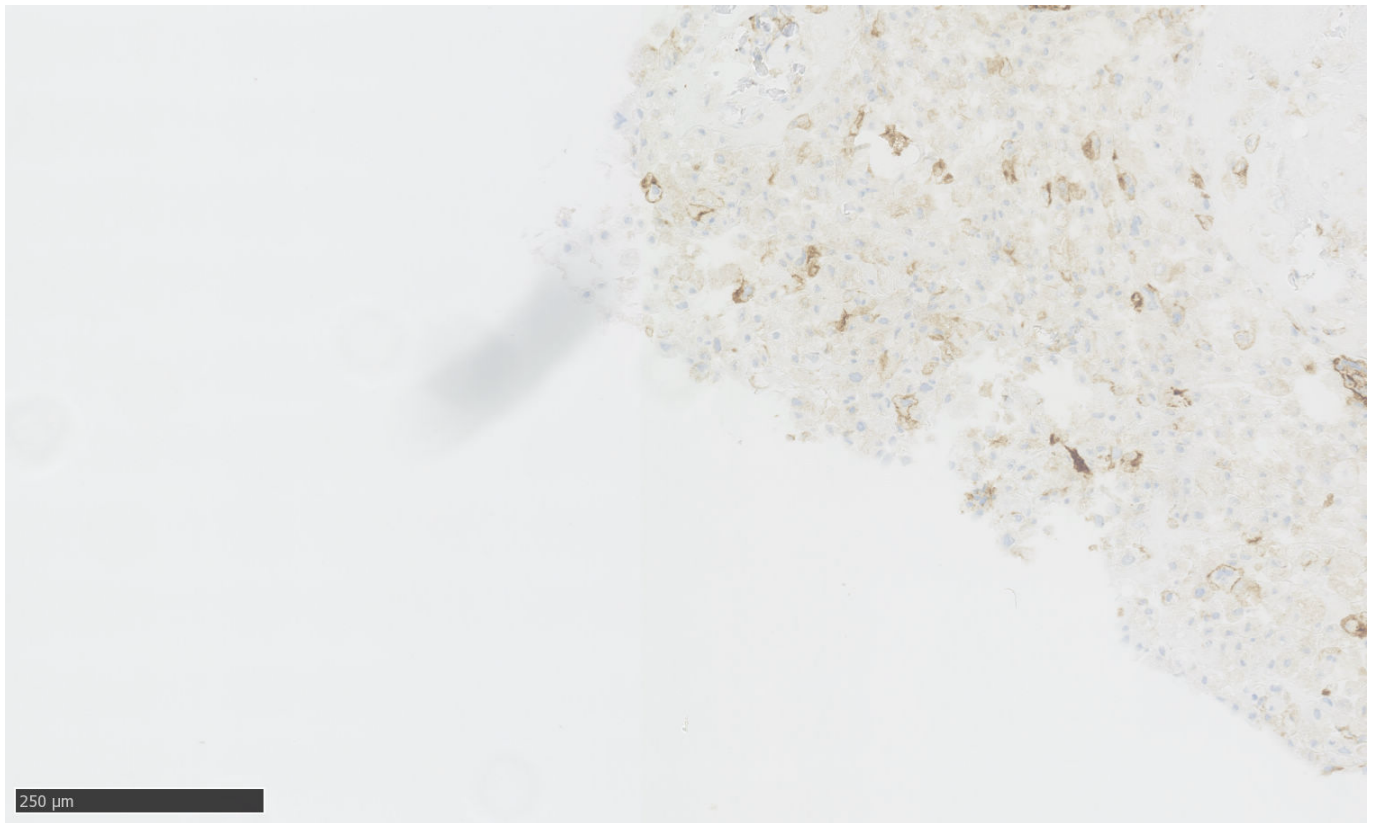

40x

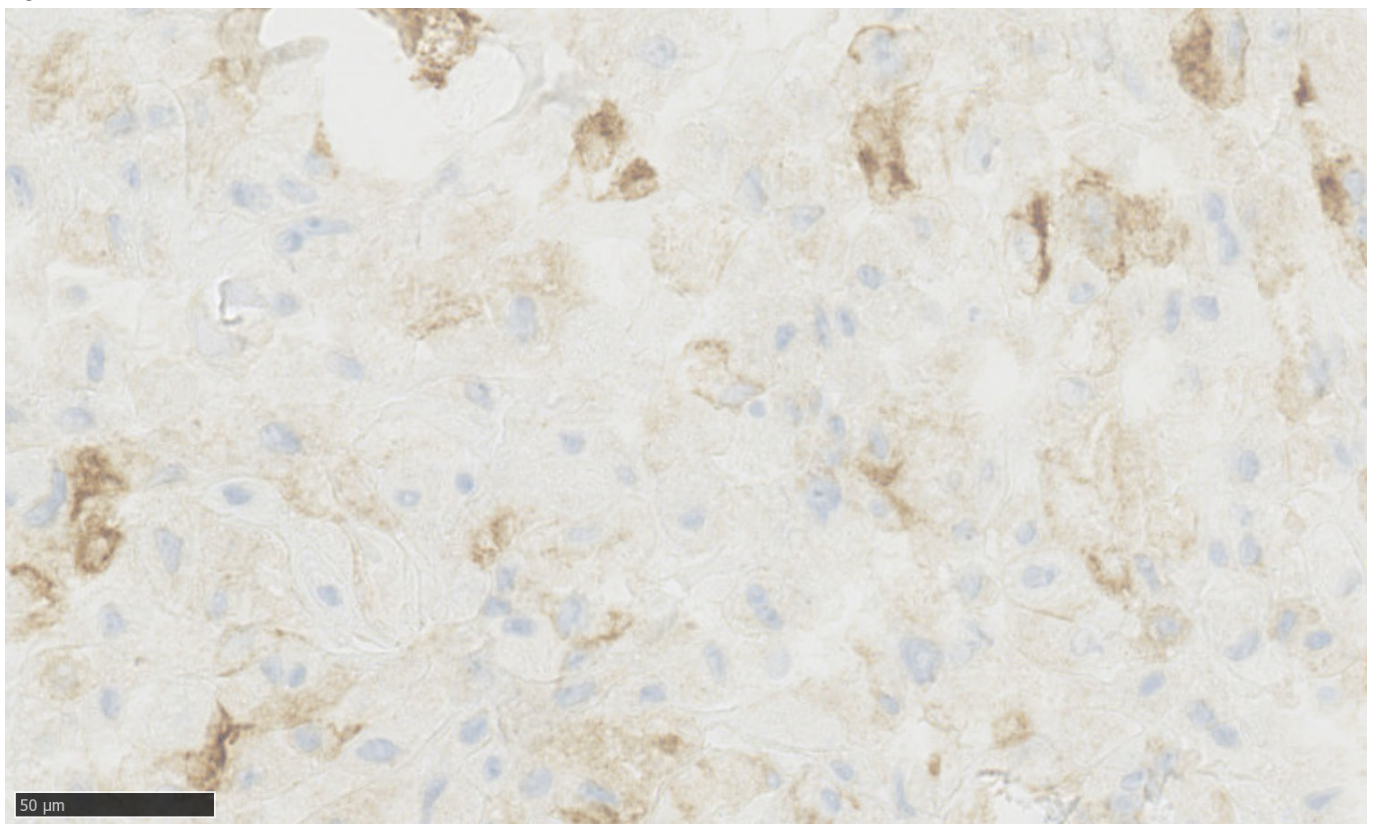

|           |     |
|-----------|-----|
| JKP       | 1   |
| MWN       | 2   |
| Consensus | 1-2 |

SSTR2

10x

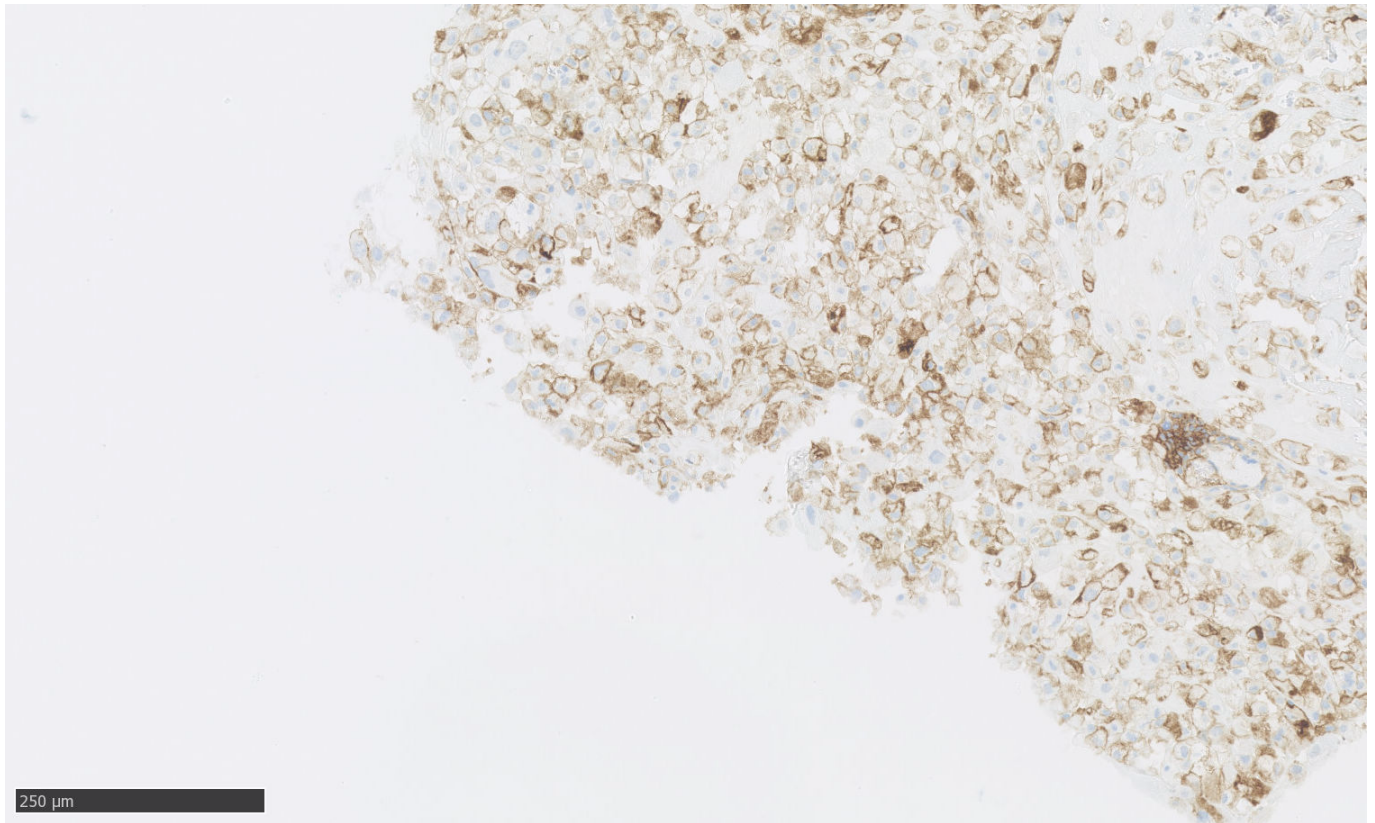

40x

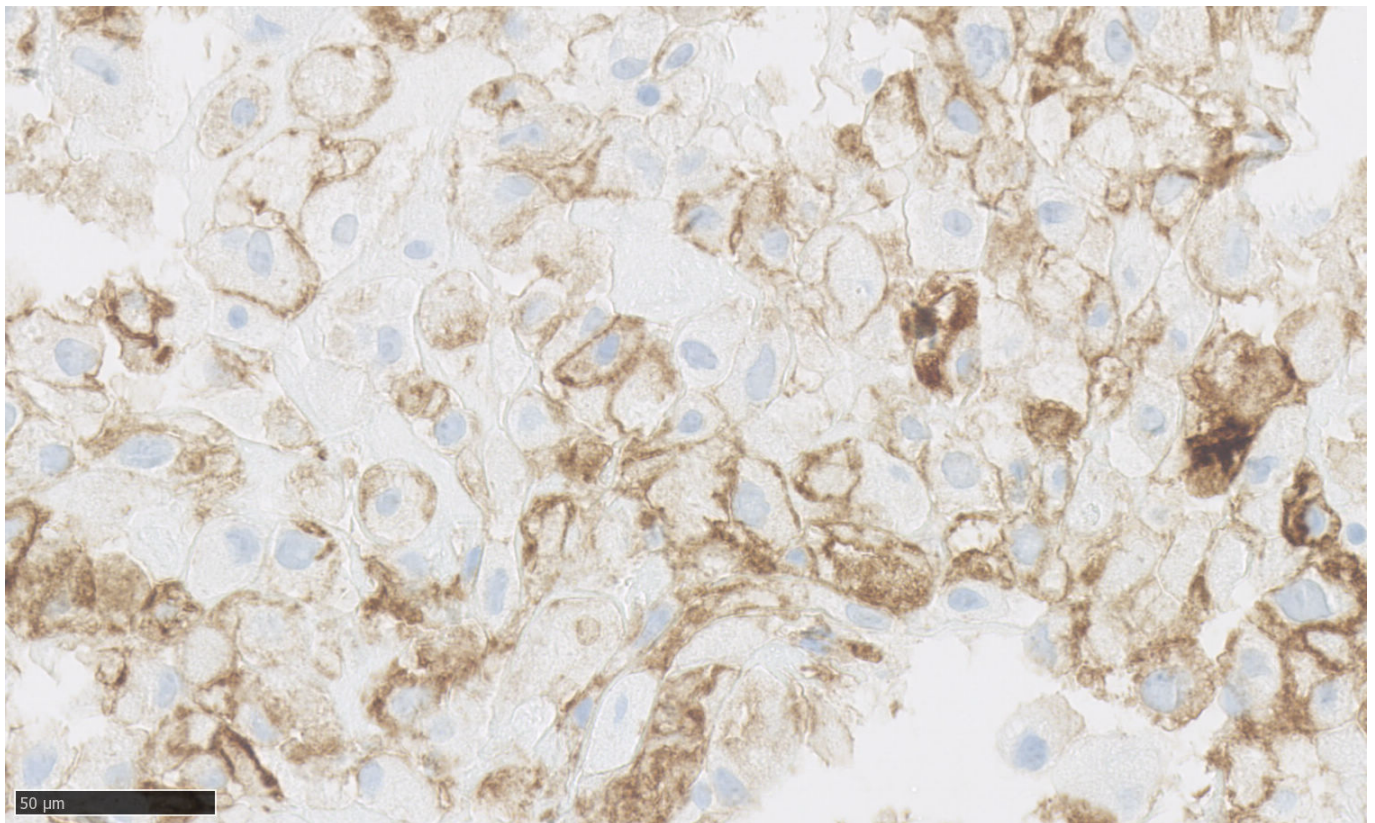

|           |     |
|-----------|-----|
| JKP       | 2   |
| MWN       | 3   |
| Consensus | 2-3 |



PR  
10x

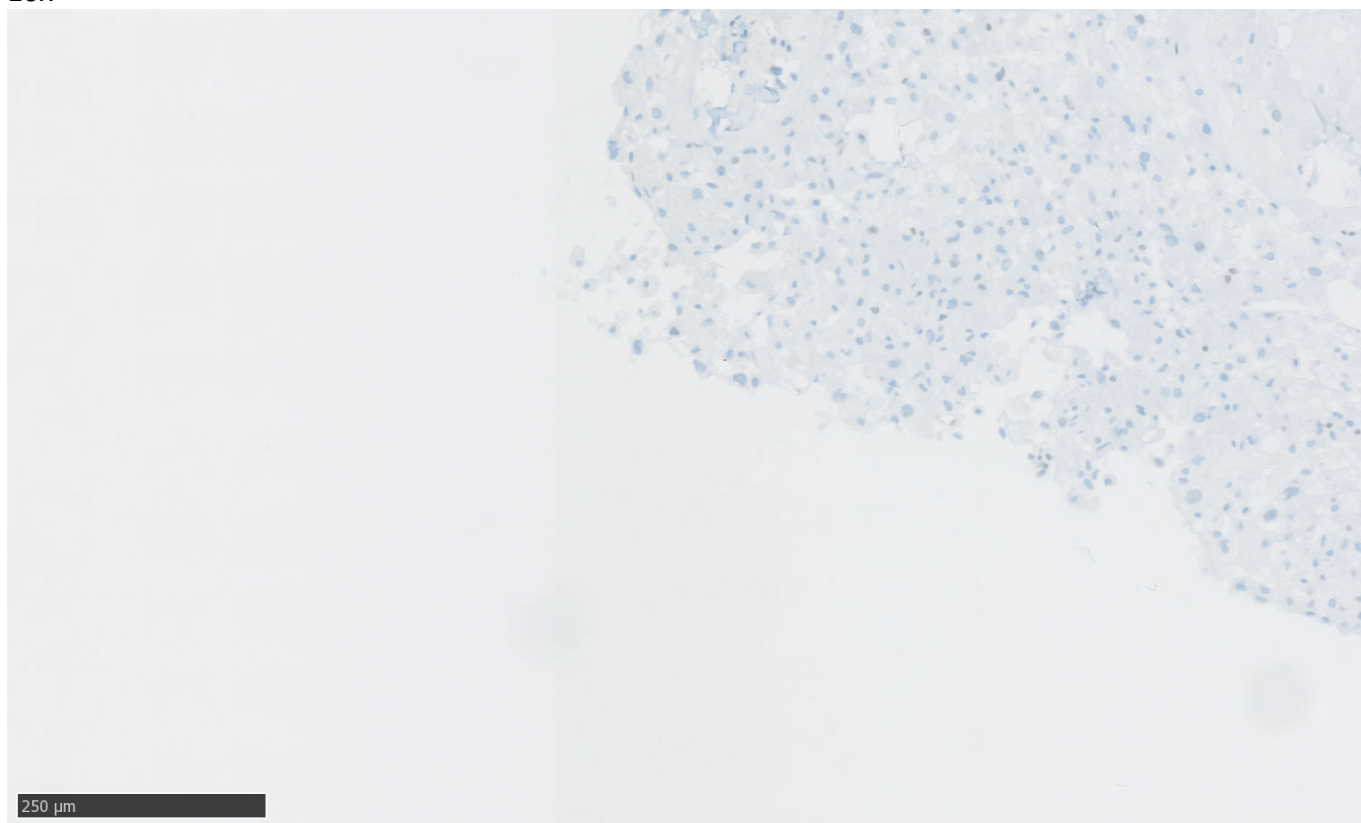

40x

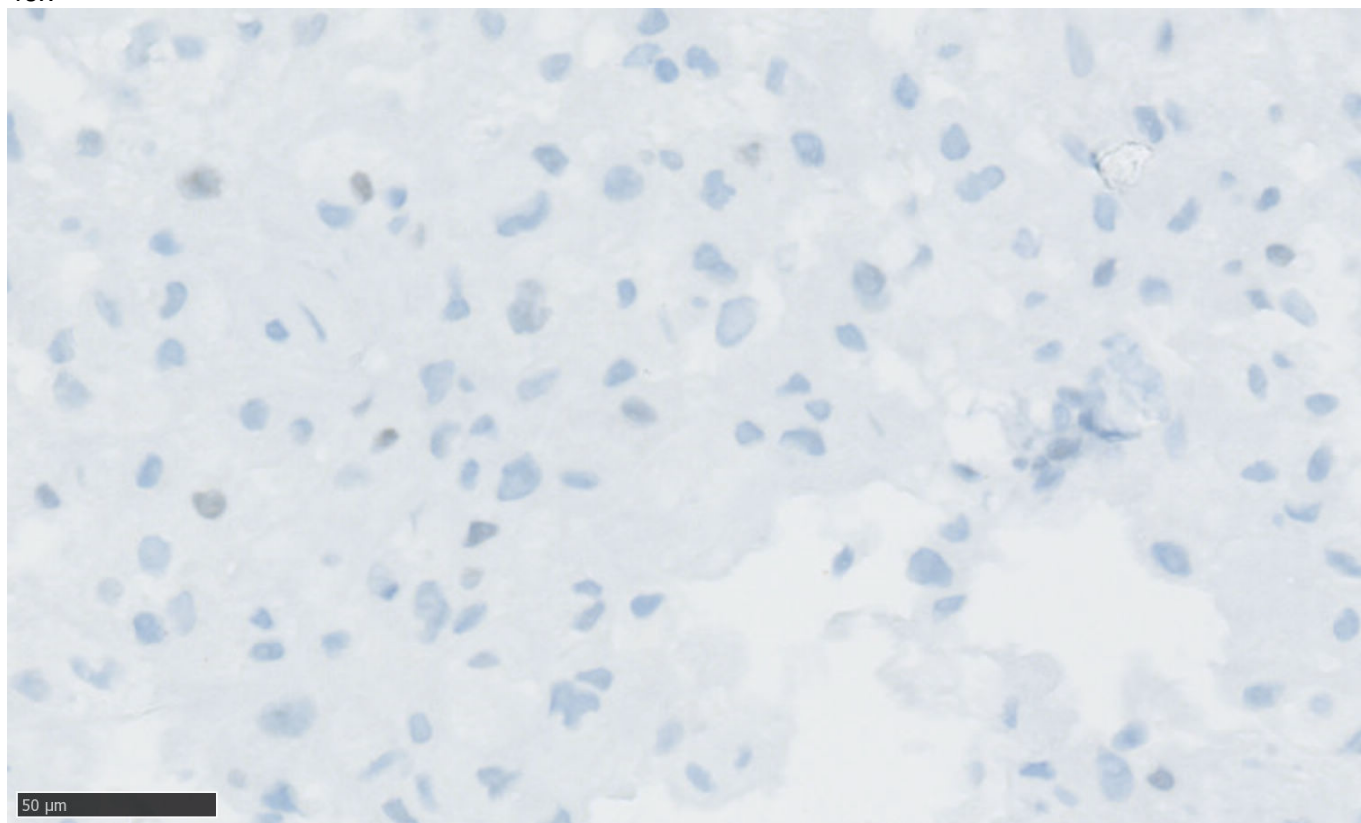

|           |   |
|-----------|---|
| JKP       | 0 |
| MWN       | 0 |
| Consensus | 0 |

# GFAP

10x

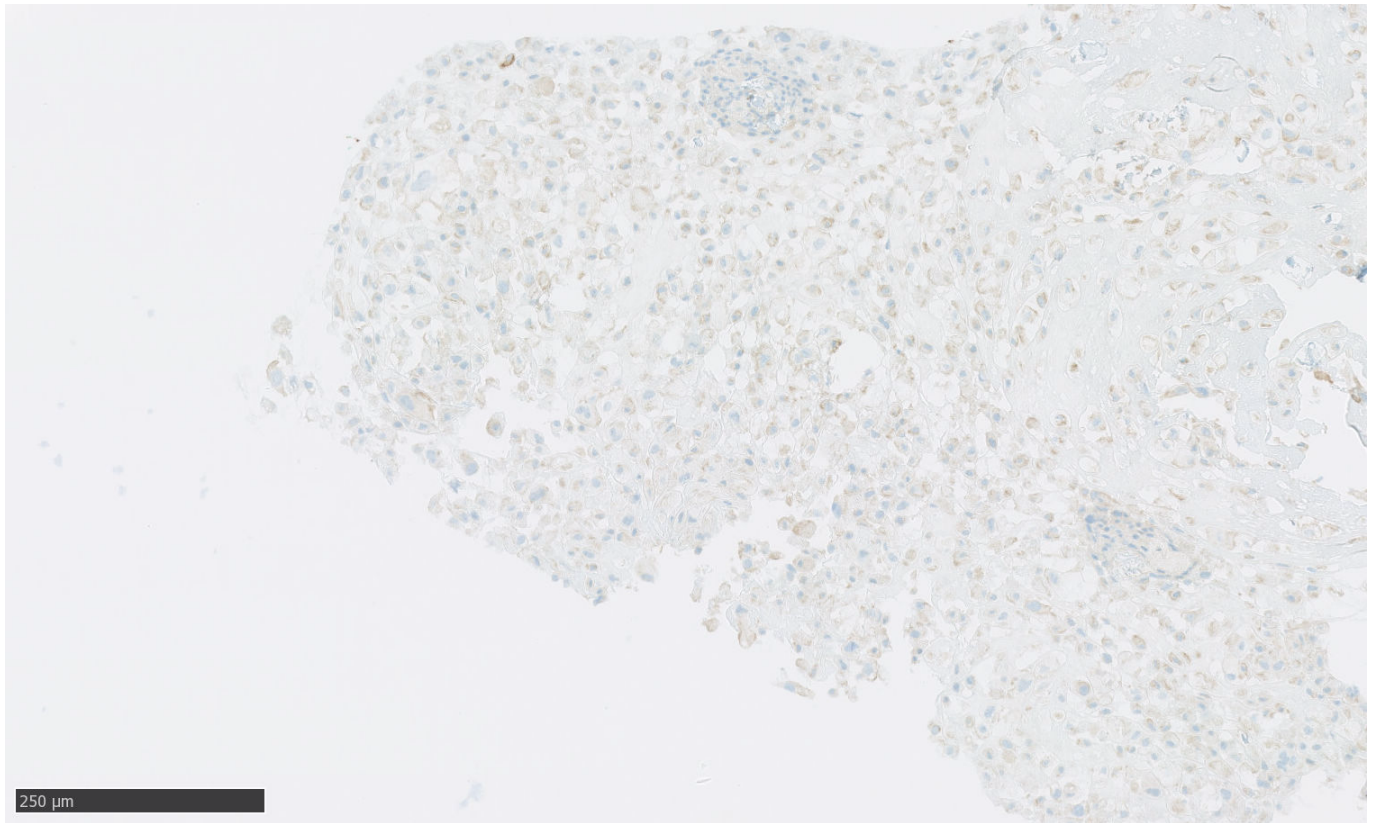

40x

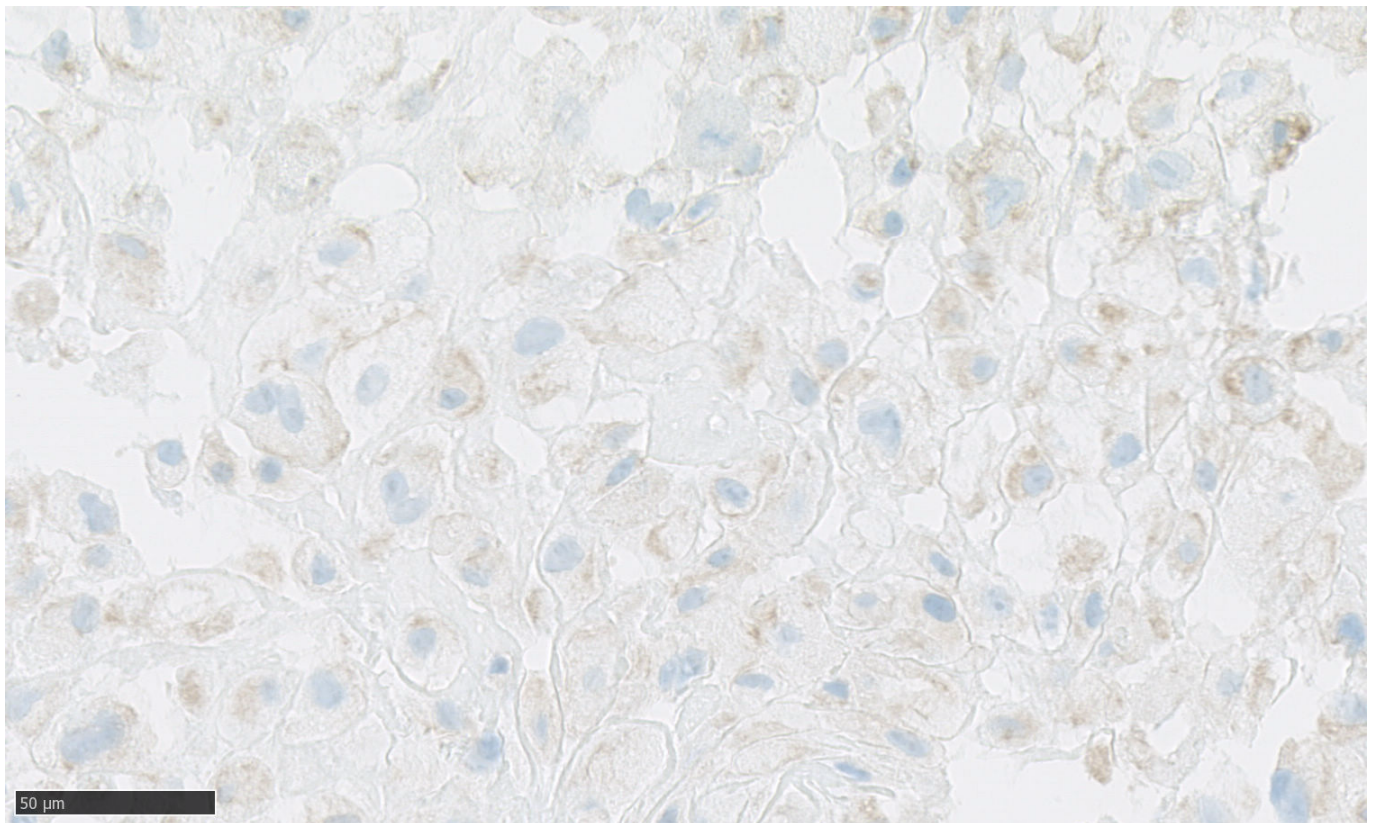

|           |      |
|-----------|------|
| JKP       | US/0 |
| MWN       | US/1 |
| Consensus | US   |

KI67

10x

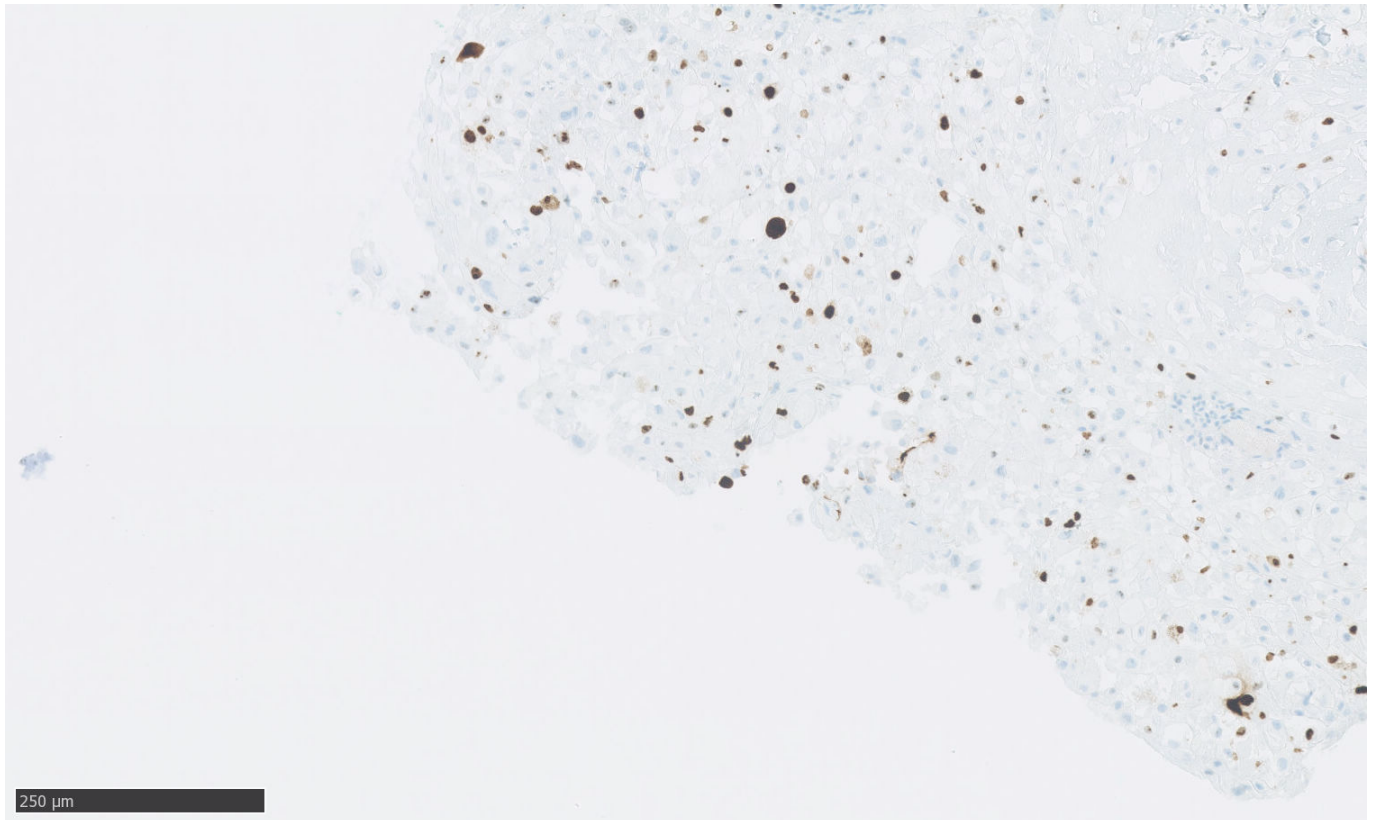

40x

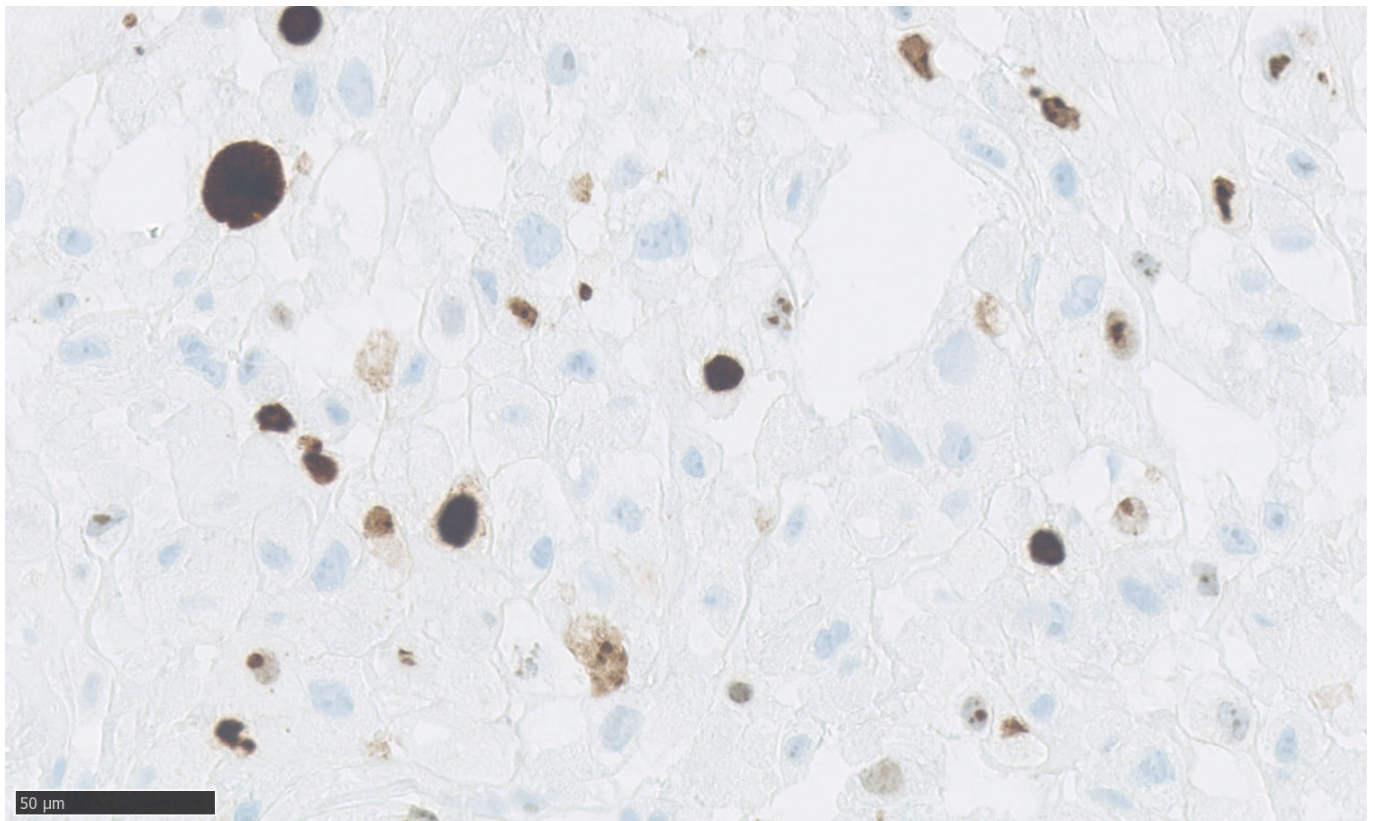

|           |     |
|-----------|-----|
| JKP       | 20% |
| MWN       | 20% |
| Consensus | 20% |

# MEN-25

EMA

10x

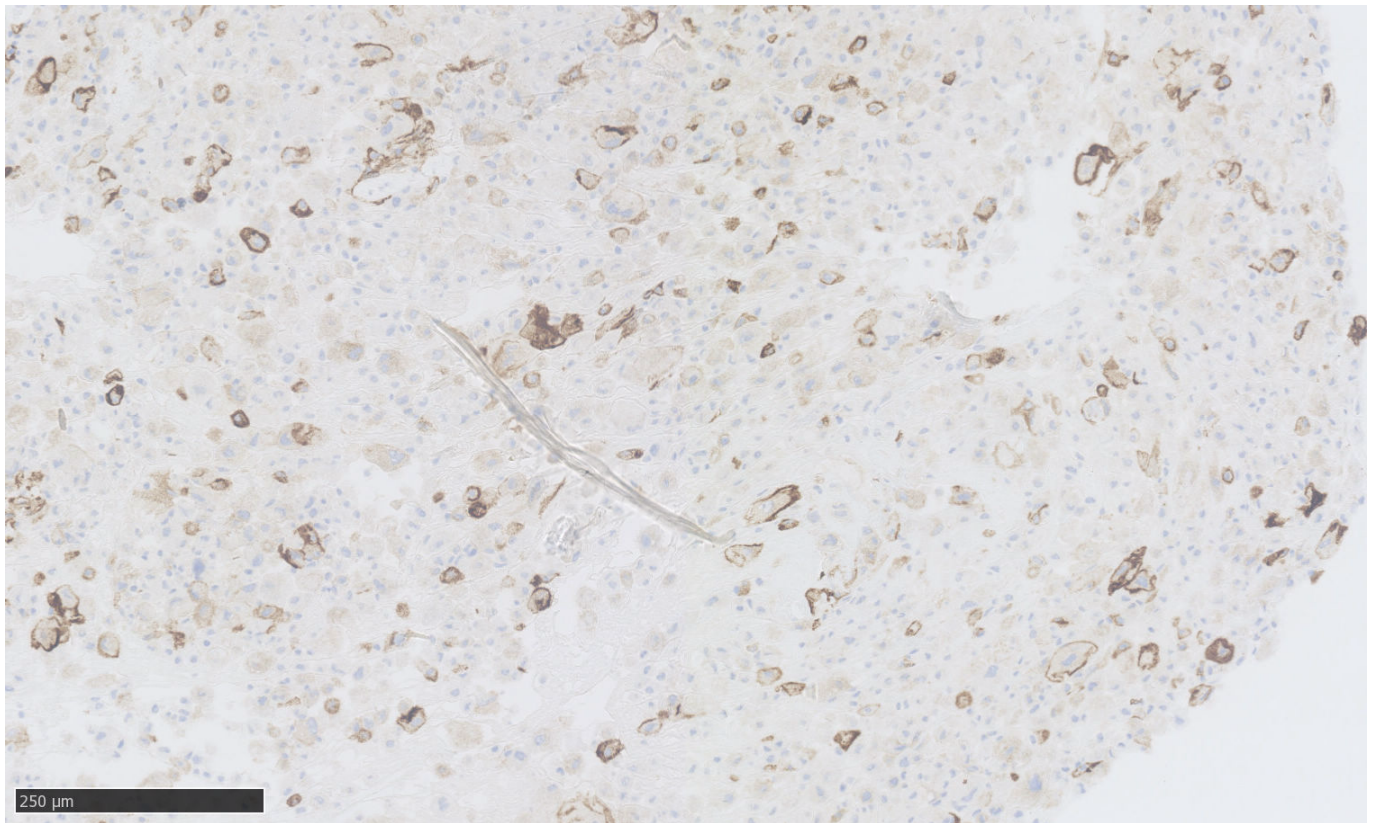

40x

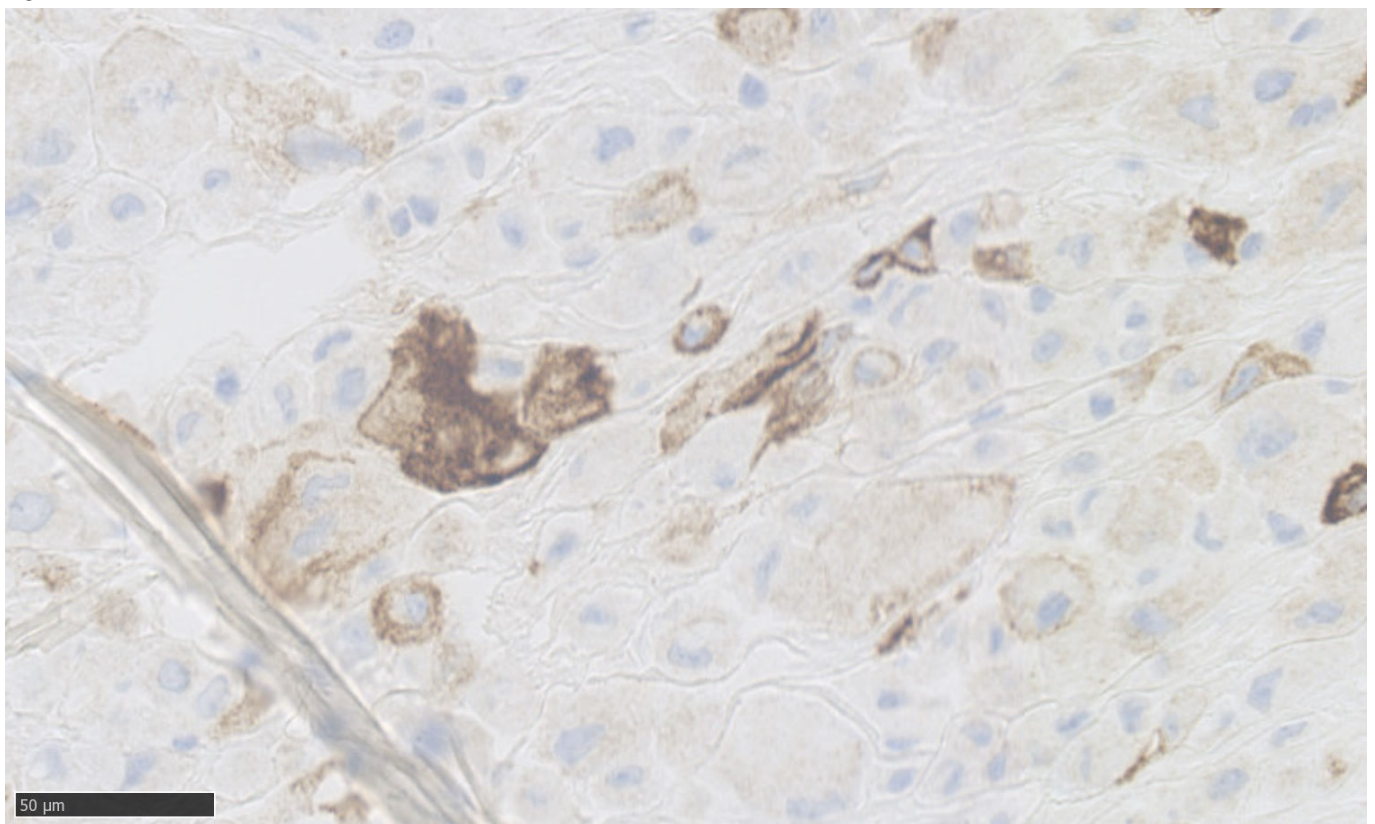

|           |     |
|-----------|-----|
| JKP       | 1   |
| MWN       | 2   |
| Consensus | 1-2 |

SSTR2

10x

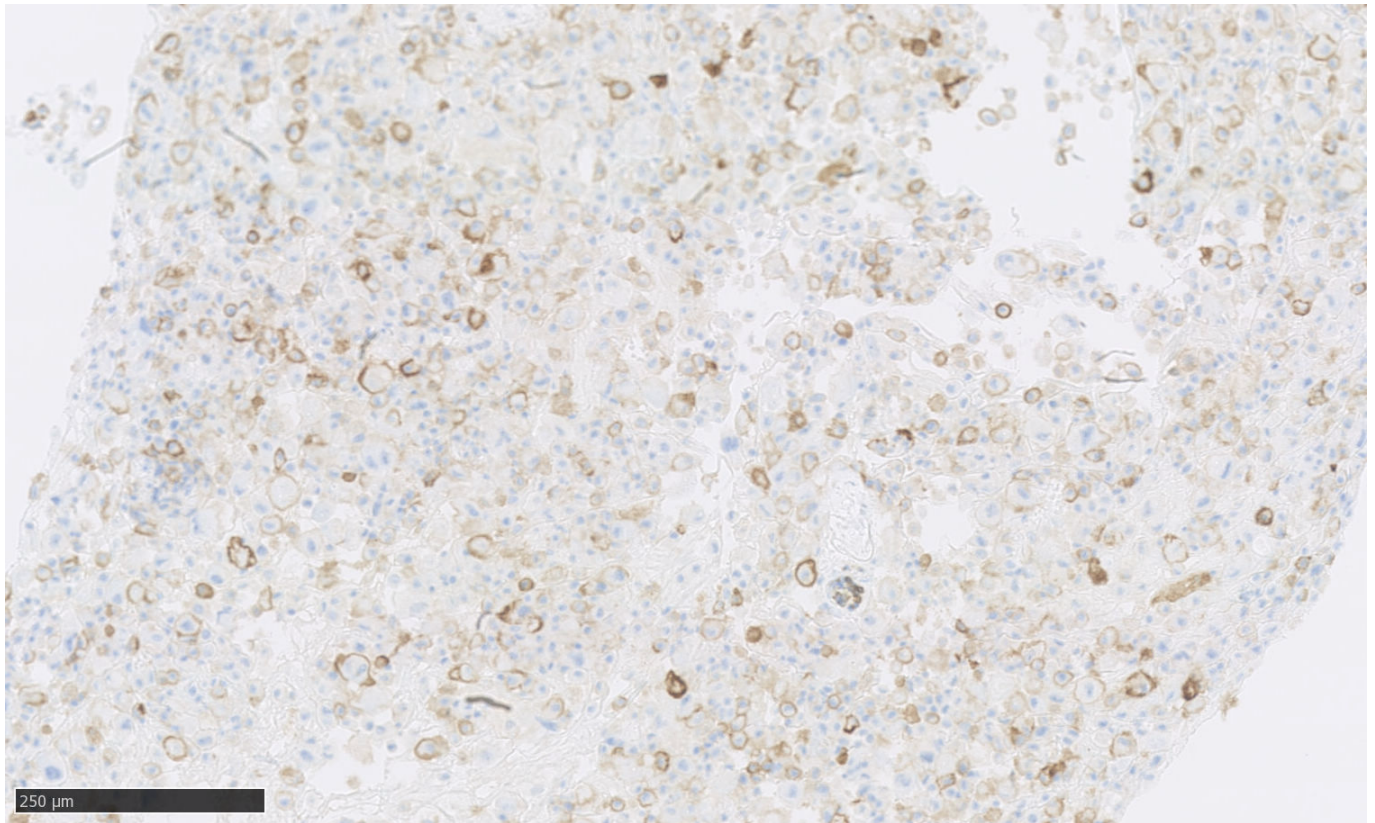

40x

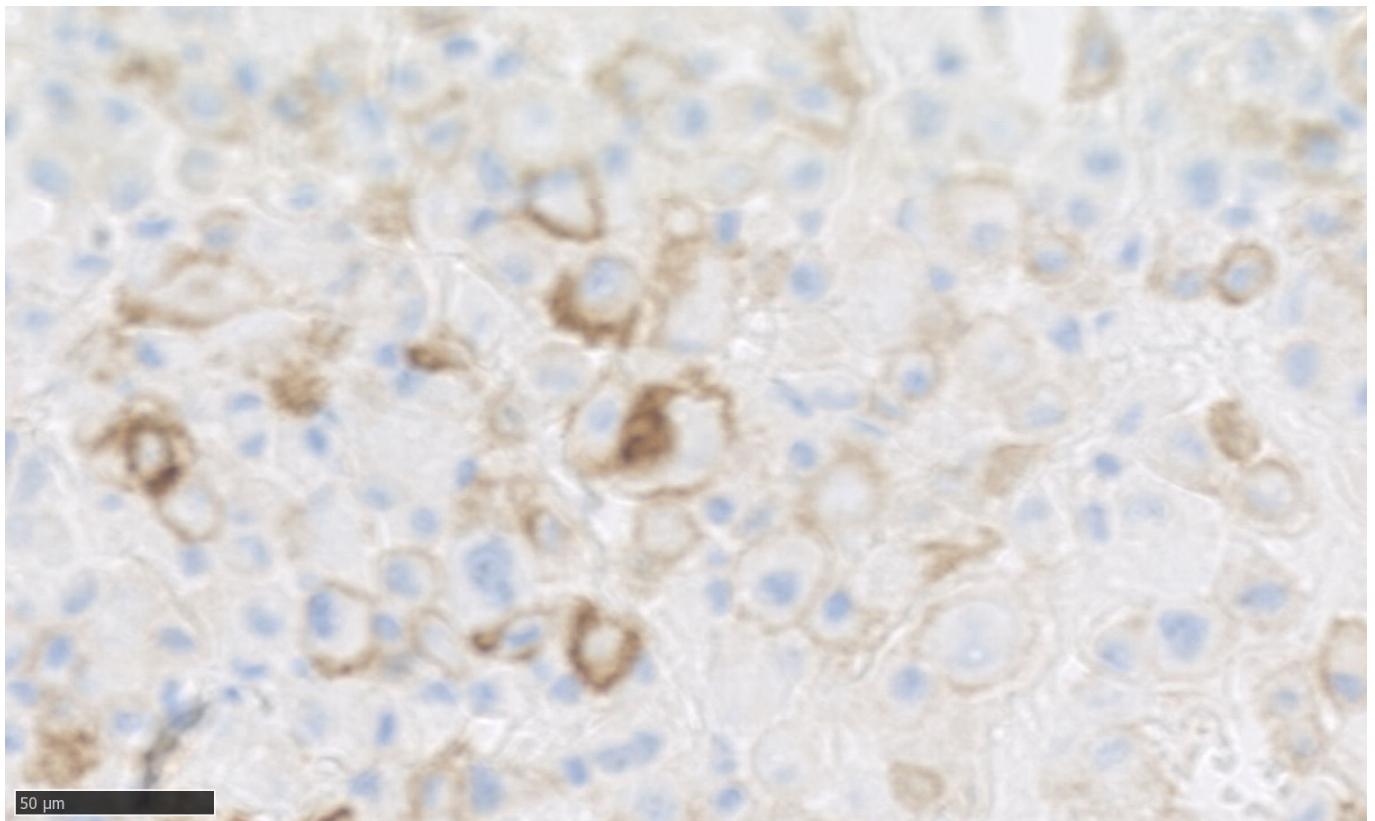

|           |   |
|-----------|---|
| JKP       | 2 |
| MWN       | 2 |
| Consensus | 2 |

PR  
X10

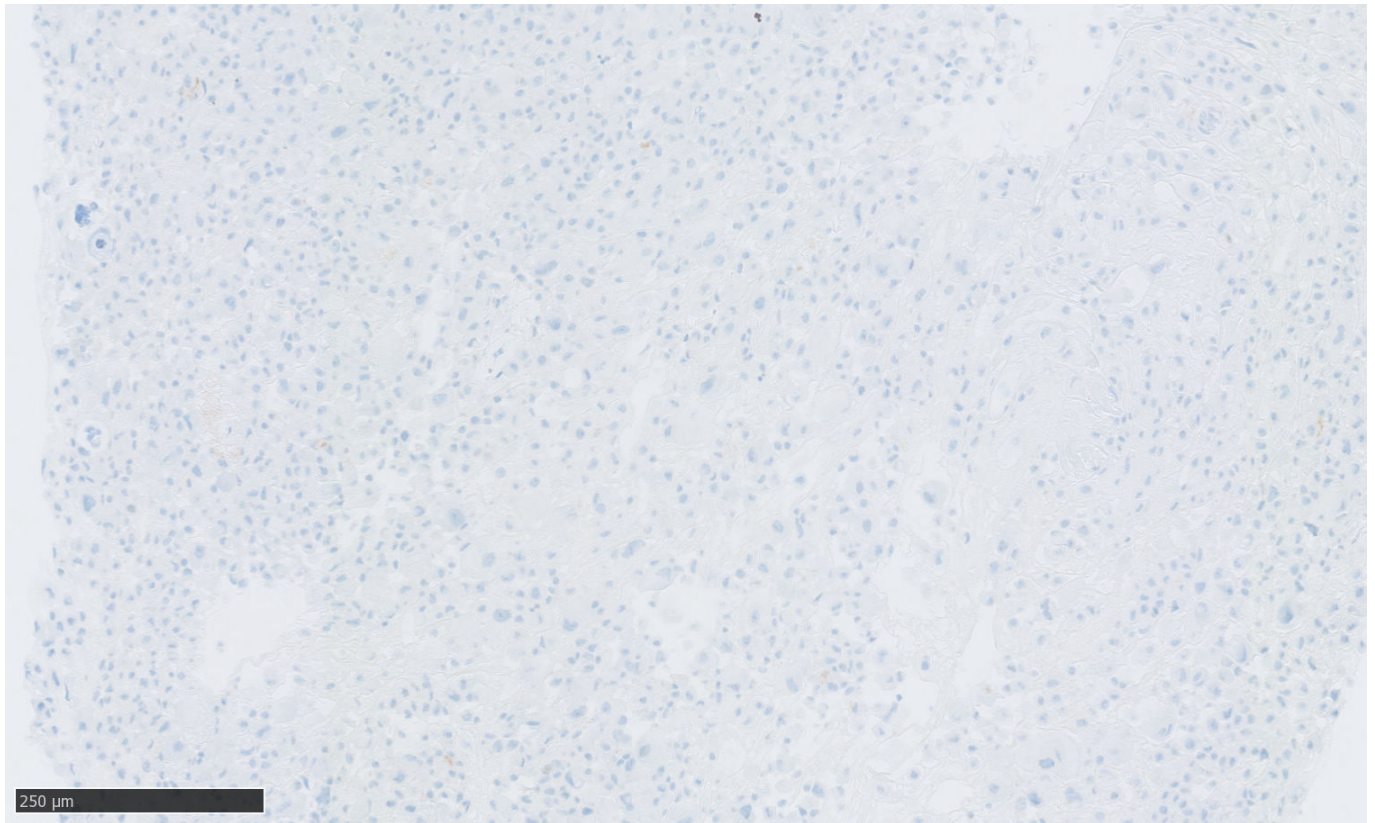

40x

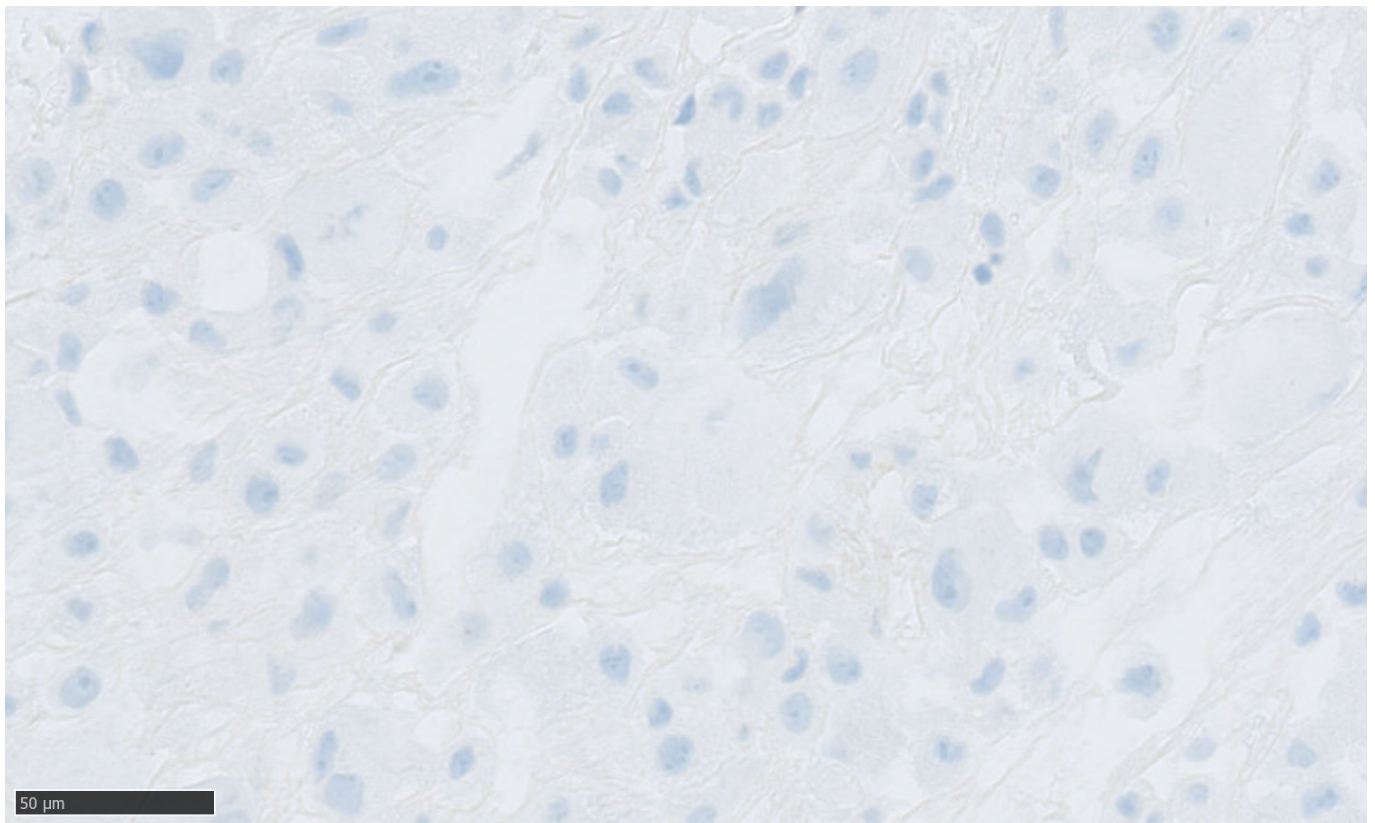

|           |   |
|-----------|---|
| JKP       | 0 |
| MWN       | 0 |
| Consensus | 0 |

# GFAP

10x

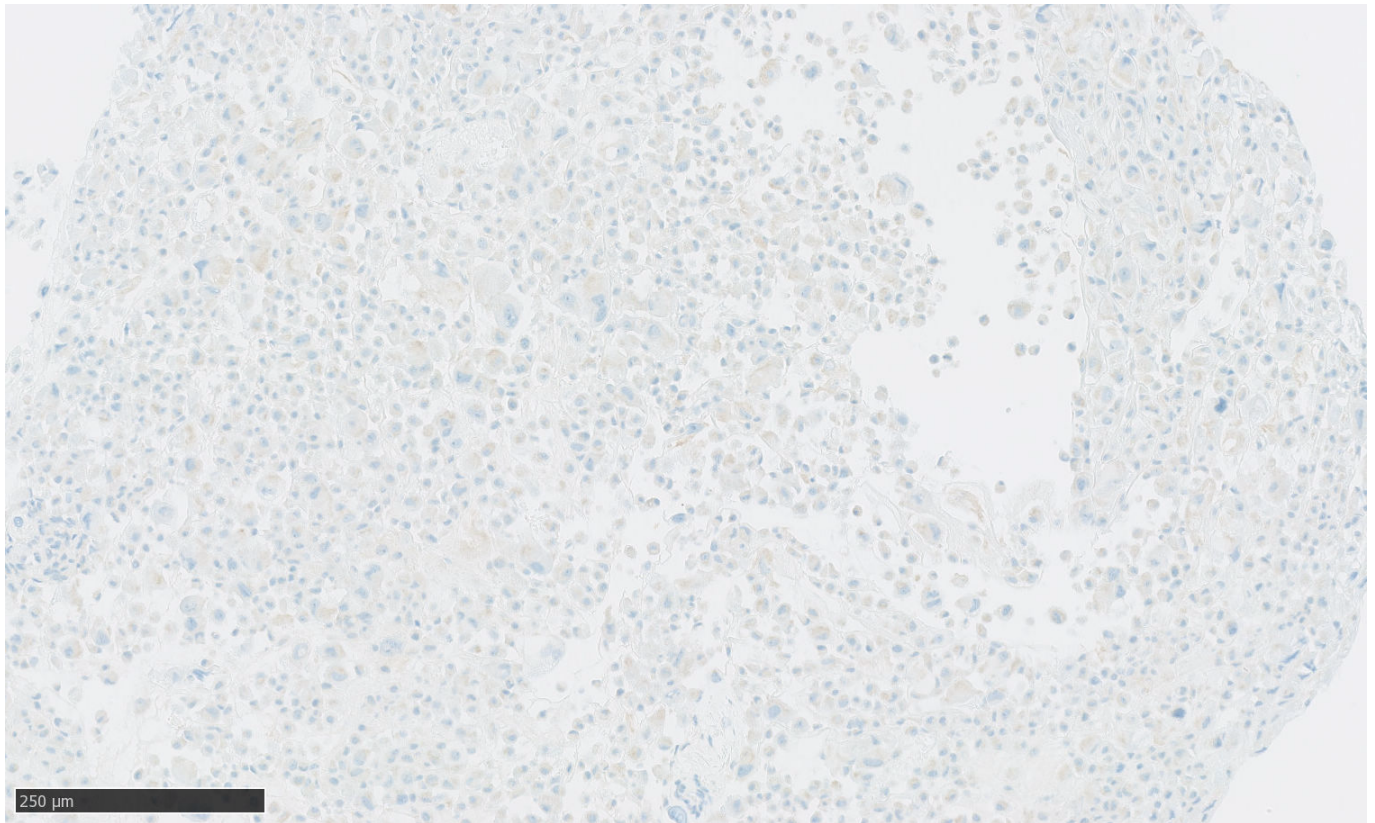

40x

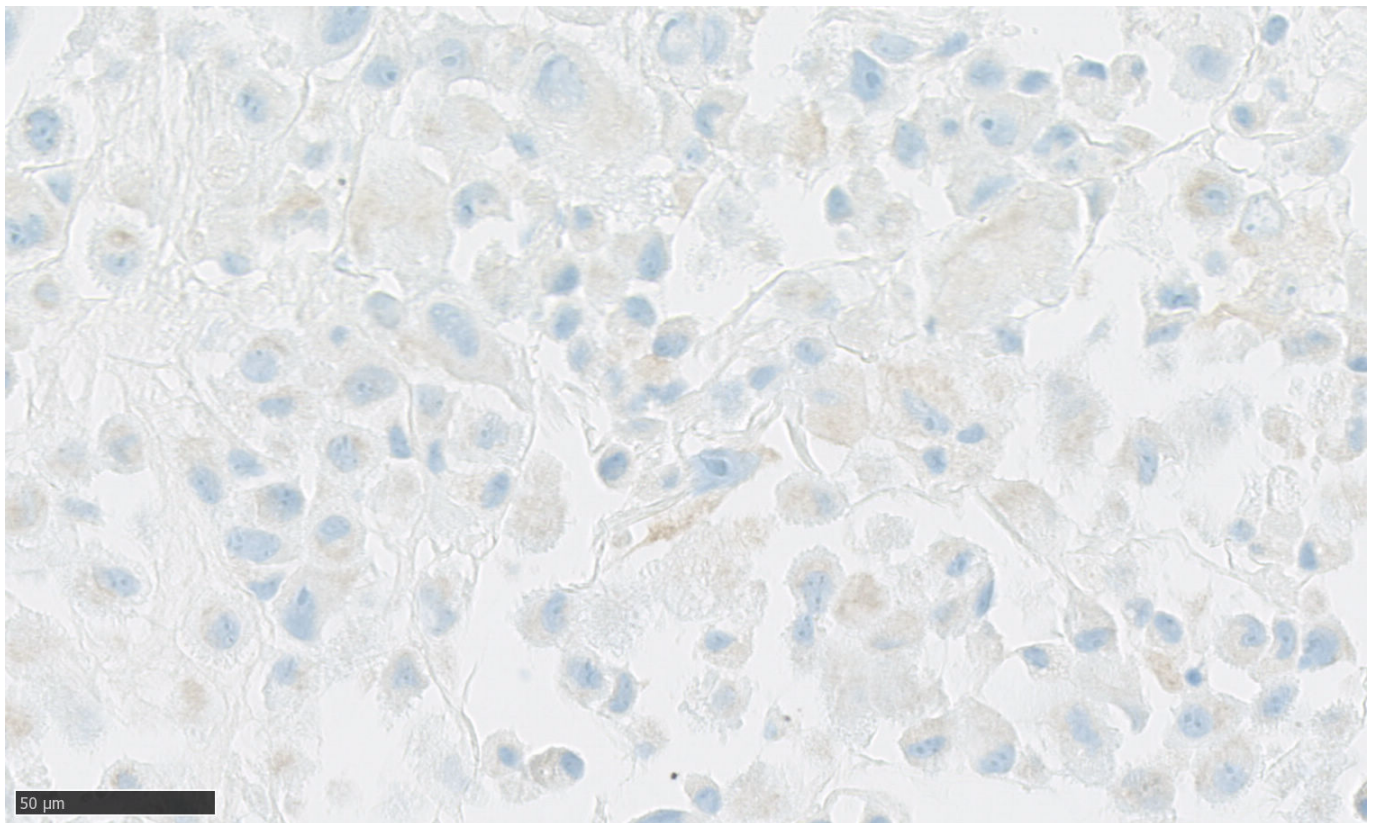

|           |      |
|-----------|------|
| JKP       | US/0 |
| MWN       | US/0 |
| Consensus | US   |

KI67

10x

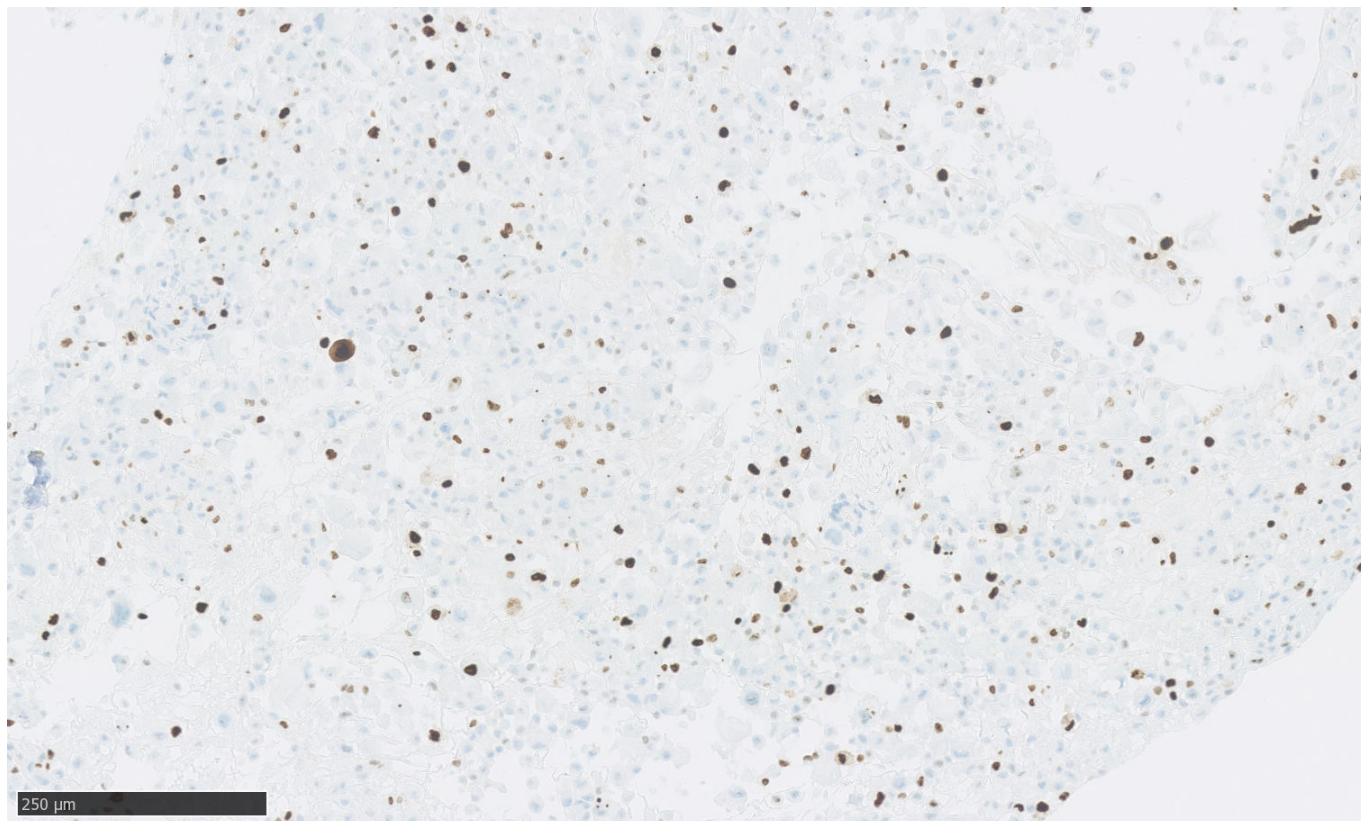

40x

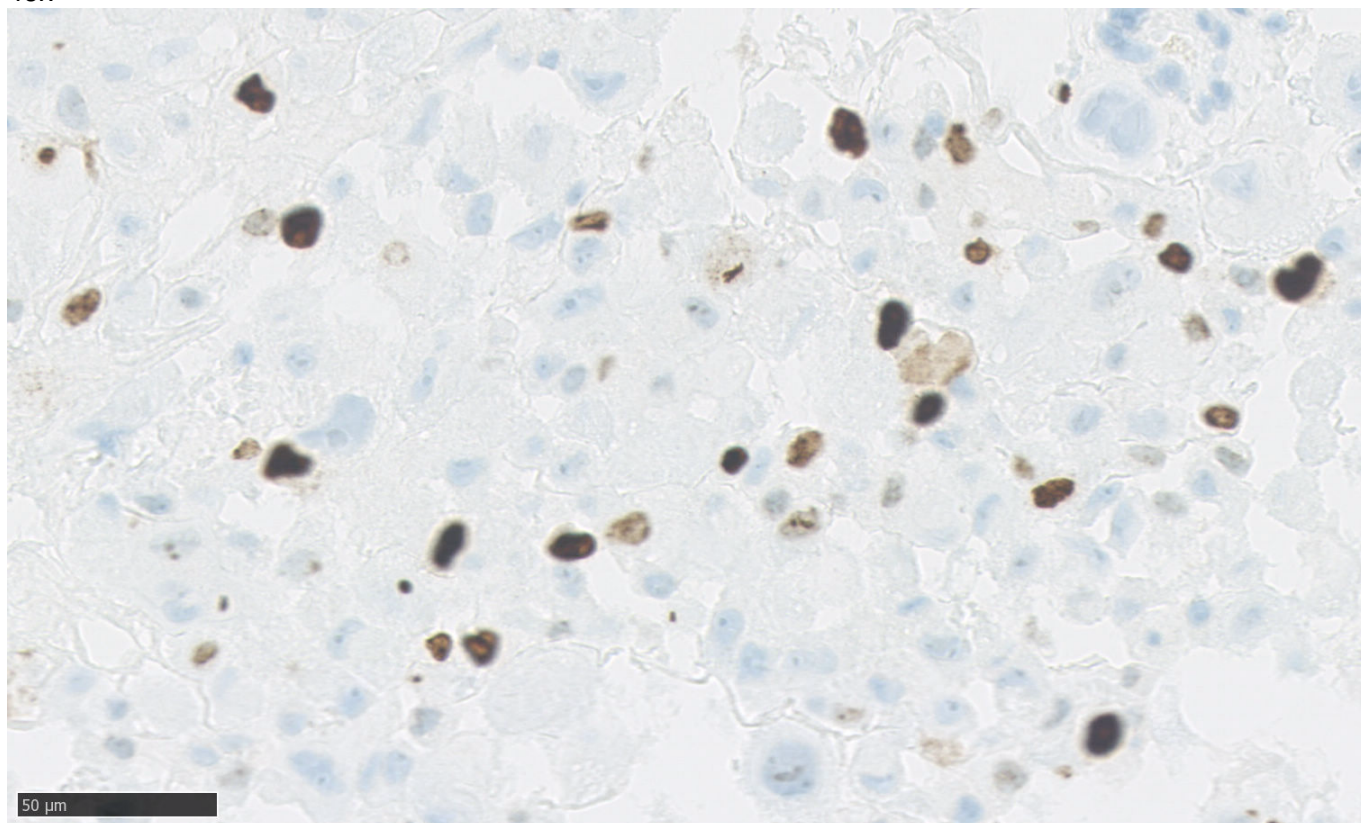

|           |     |
|-----------|-----|
| JKP       | 10  |
| MWN       | 10  |
| Consensus | 10% |



MEN-27

EMA

10x

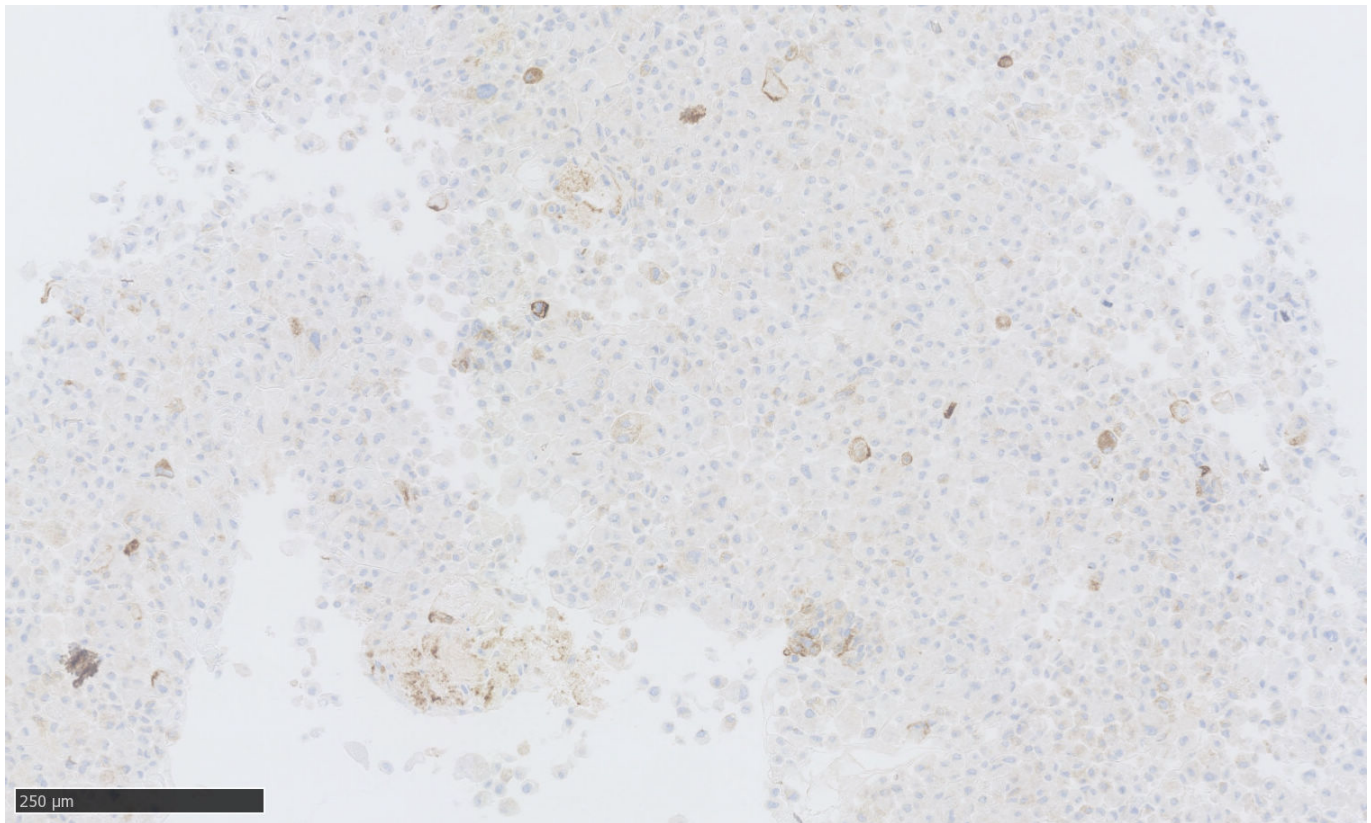

40x

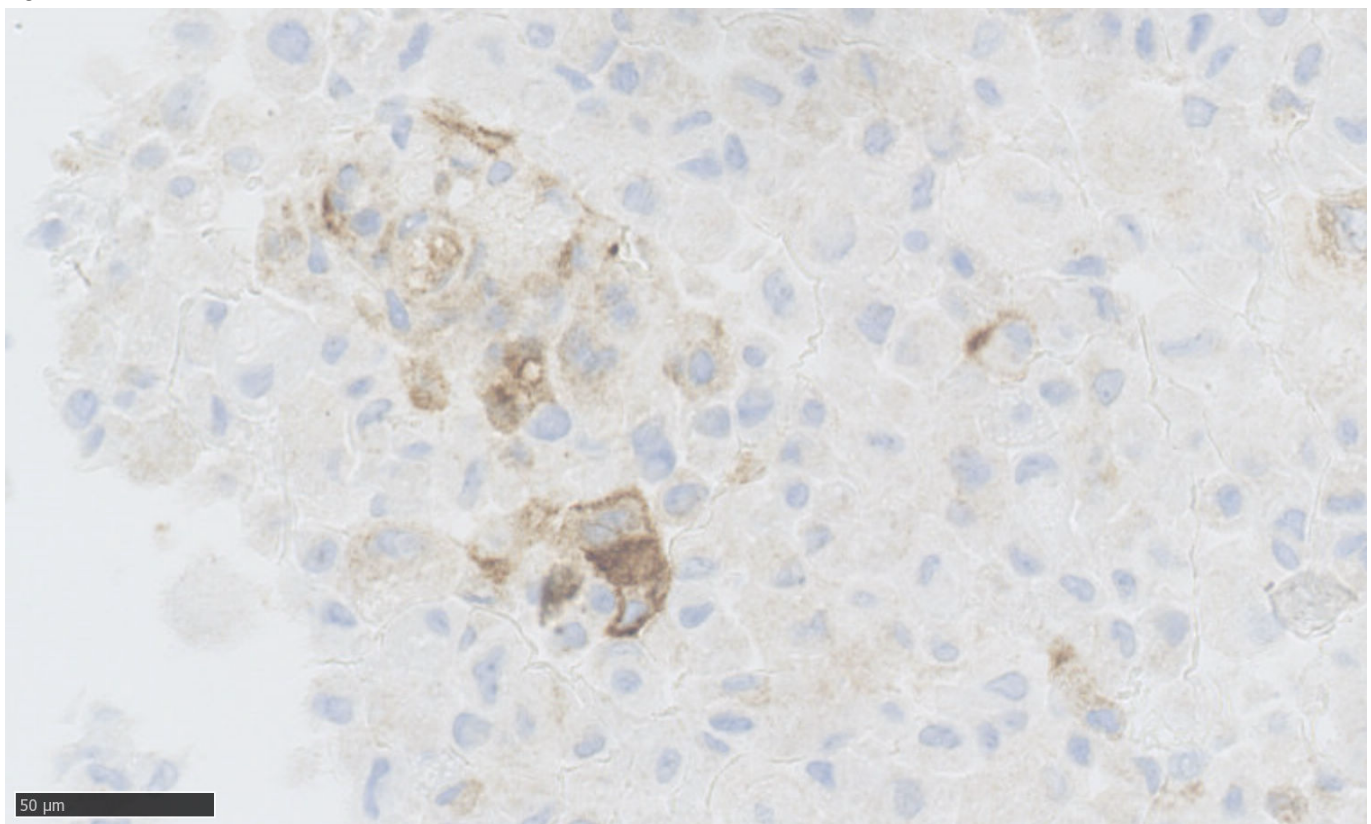

|           |   |
|-----------|---|
| JKP       | 1 |
| MWN       | 1 |
| Consensus | 1 |

SSTR2

10x

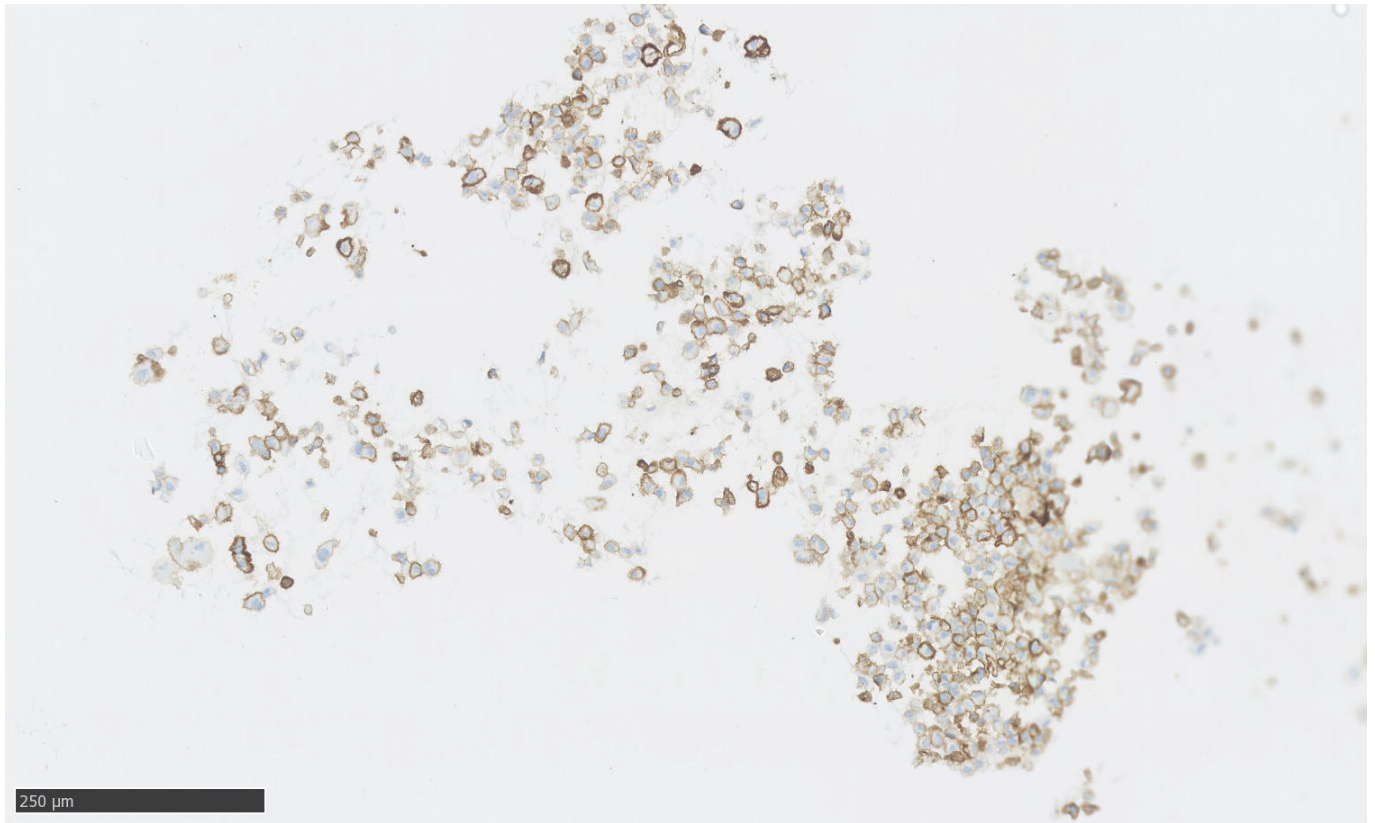

40x

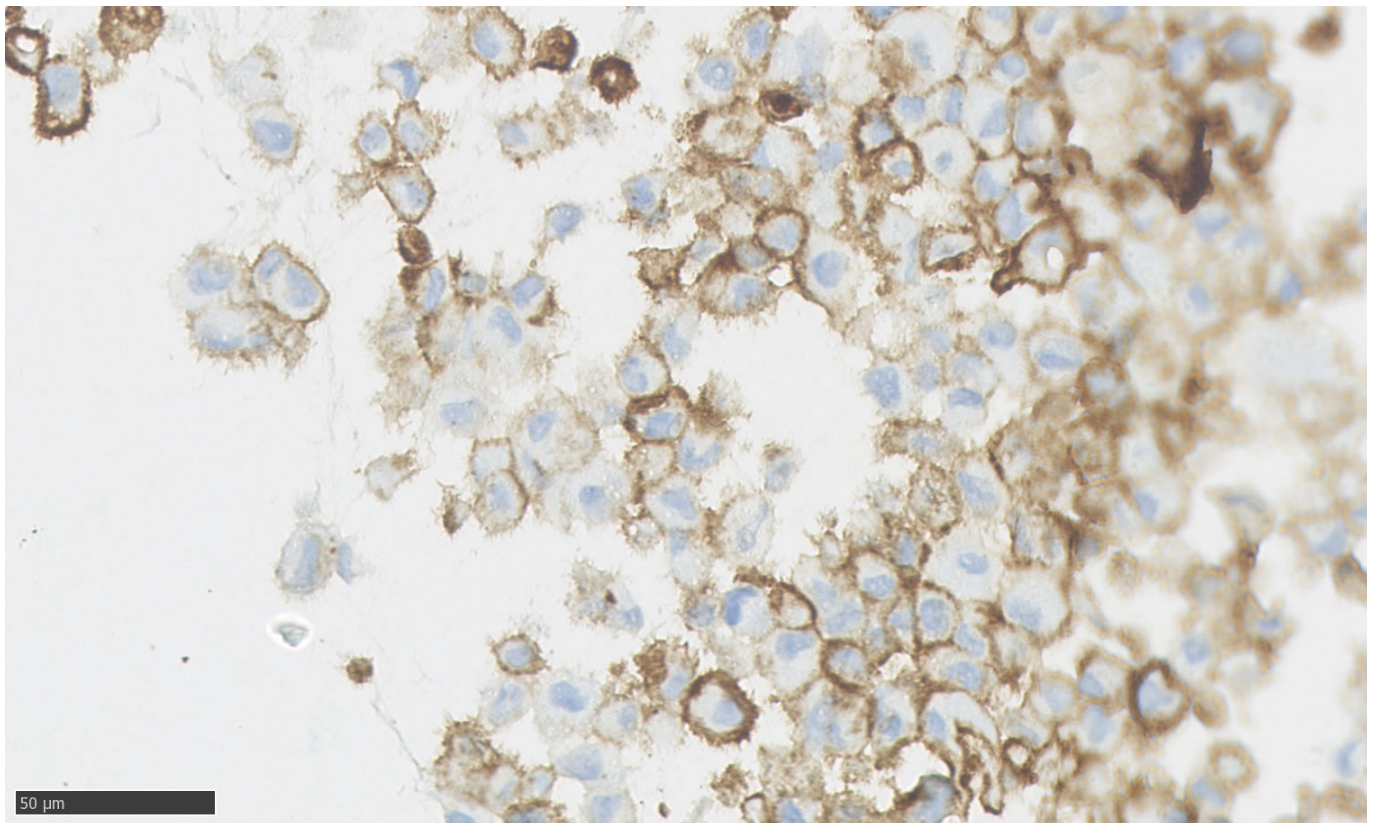

|           |   |
|-----------|---|
| JKP       | 3 |
| MWN       | 3 |
| Consensus | 3 |

PR  
X10

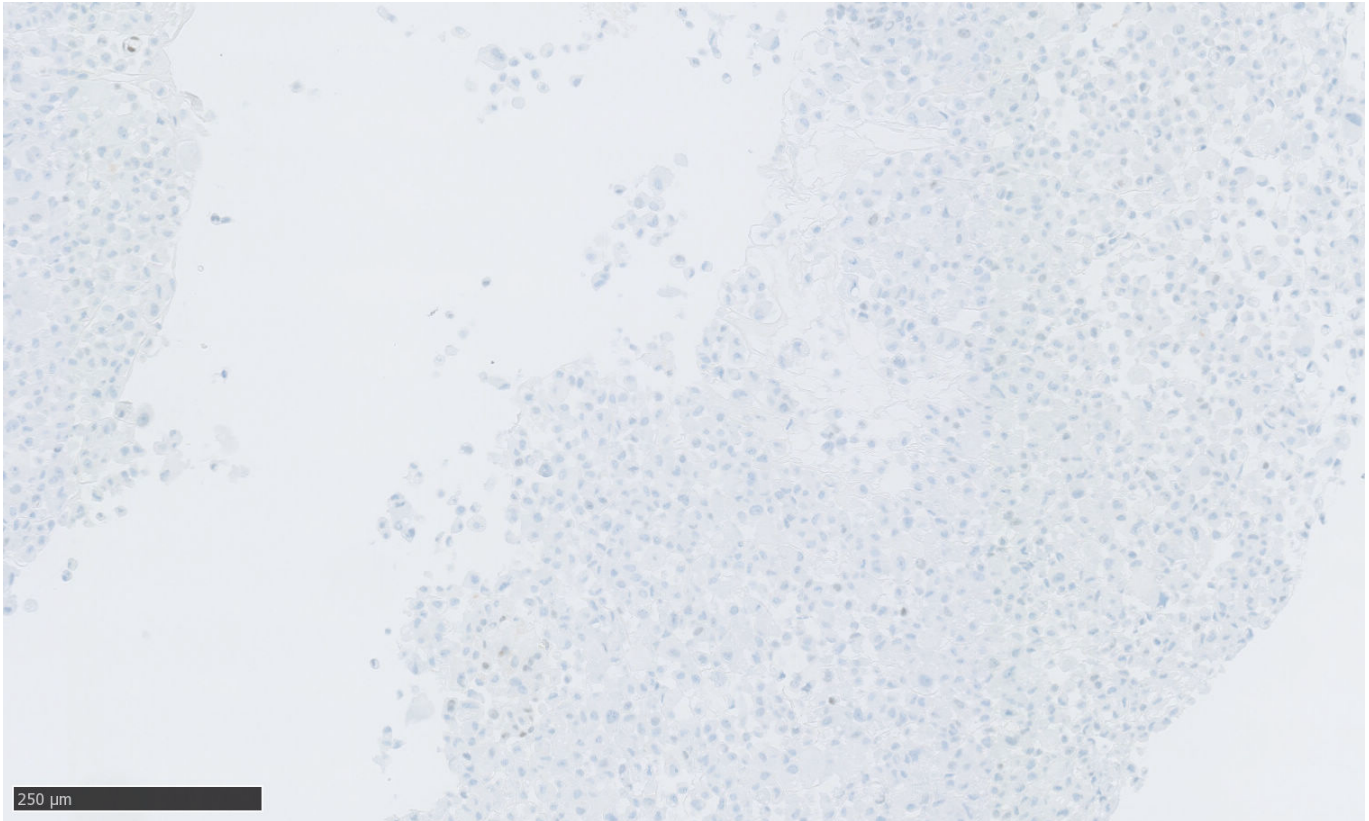

40x

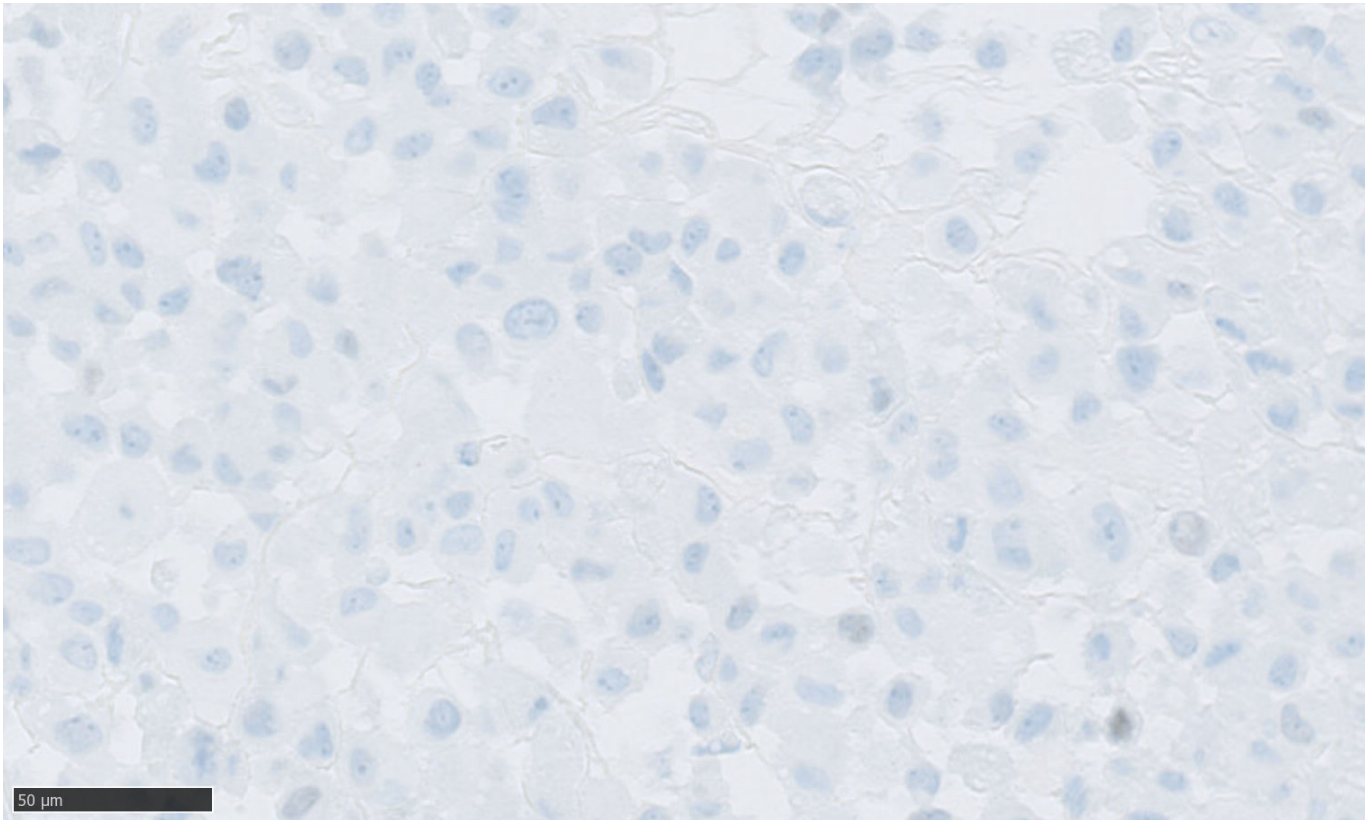

|           |   |
|-----------|---|
| JKP       | 0 |
| MWN       | 0 |
| Consensus | 0 |

# GFAP

10x

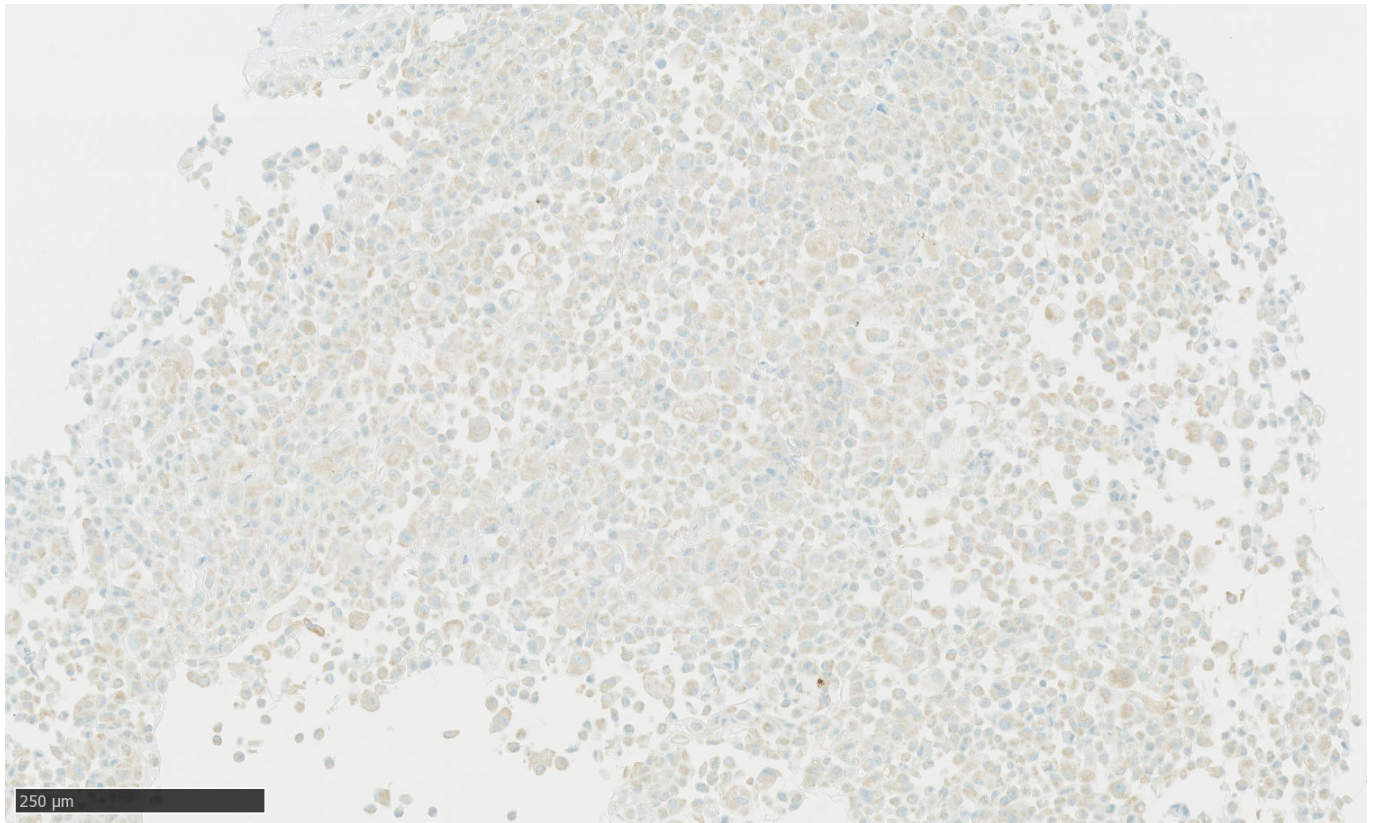

40x

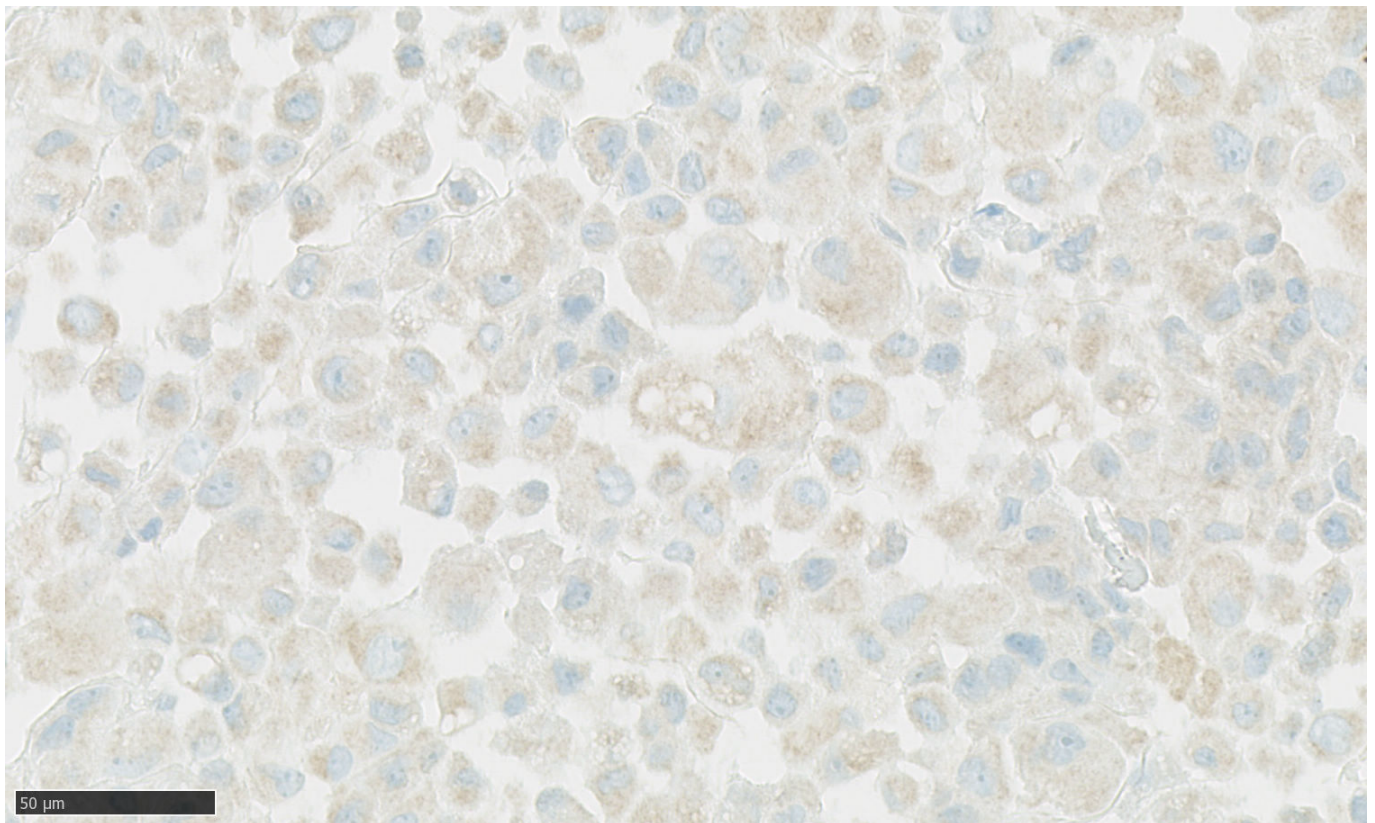

|           |      |
|-----------|------|
| JKP       | US/0 |
| MWN       | US/1 |
| Consensus | US   |

KI67

x10

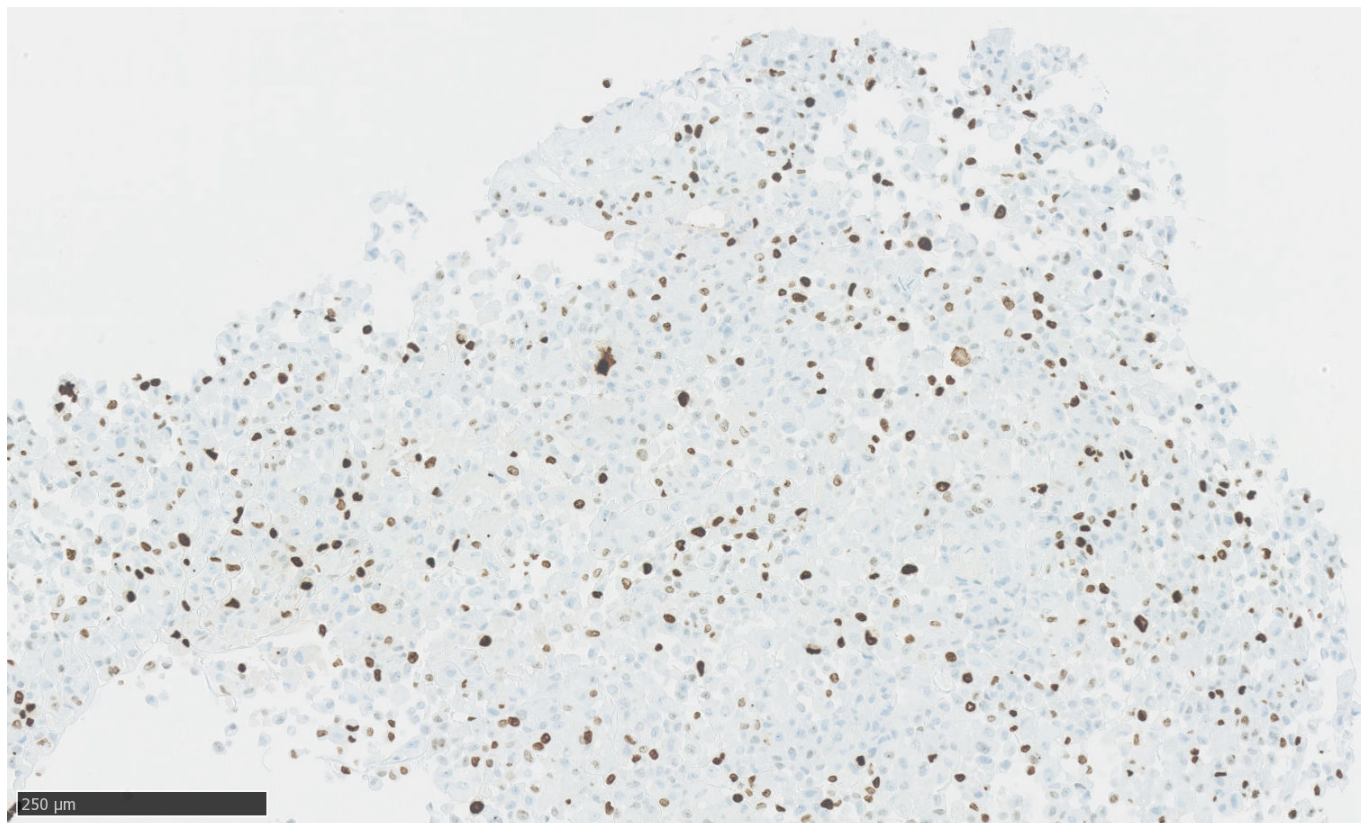

x40

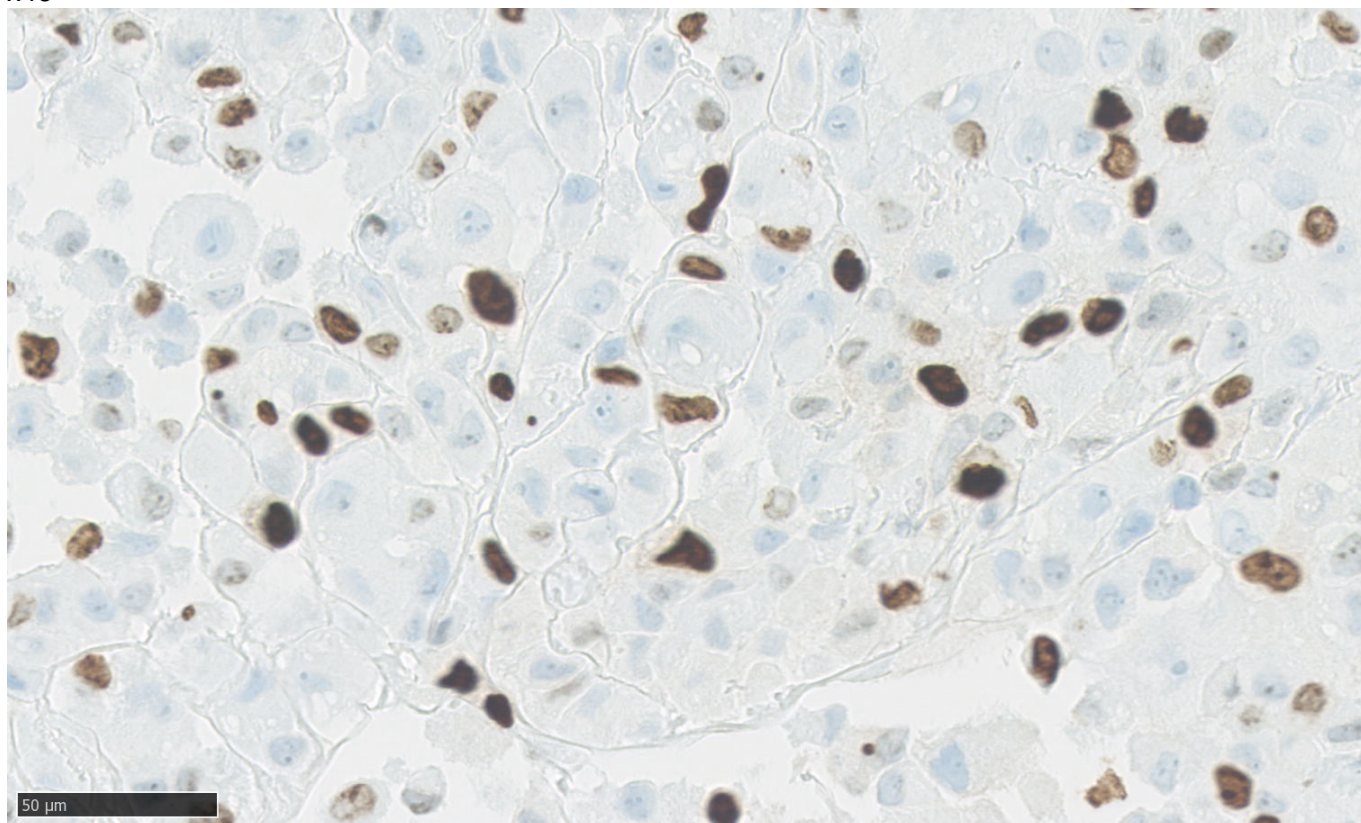

|           |     |
|-----------|-----|
| JKP       | 20  |
| MWN       | 20  |
| Consensus | 20% |
