# Supplementary material for: Orthotopic meningioma rat model exhibits morphological and immunohistochemical congruency and epigenetic concordance with benign primary patient-derived tumors
Source: PubMed Central journal article supplement — Sci Rep. 2024 Dec 30;14:31933. doi: 10.1038/s41598-024-83456-7 (PMC11686083; doi:10.1038/s41598-024-83456-7), 2024-12-30
Supplement: 41598_2024_83456_MOESM8_ESM.pdf [file 41598_2024_83456_MOESM8_ESM.pdf]

# Supplemental material 11 – List of abbreviations

## List of abbreviations

FBS: Fetal Bovine Serum

HE: Hematoxylin Eosin

SSTR2: Somatostatin Receptor 2

PR: Progesterone Receptor

EMA: Epithelial Membrane Antigen

GFAP: Glial Fibrillary Acidic Protein

FFPE: Formalin-fixed paraffin-embedded

AU: Approximately Unbiased

BP: Bootstrap Probability

MO: Meningioma Odense

DMP: Differentially Methylated Position

DMR: Differentially Methylated Region

GSEA: Gene set enrichment analysis
