# Supplementary material for: Orthotopic meningioma rat model exhibits morphological and immunohistochemical congruency and epigenetic concordance with benign primary patient-derived tumors
Source: PubMed Central journal article supplement — Sci Rep. 2024 Dec 30;14:31933. doi: 10.1038/s41598-024-83456-7 (PMC11686083; doi:10.1038/s41598-024-83456-7), 2024-12-30
Supplement: 41598_2024_83456_MOESM10_ESM.pdf [file 41598_2024_83456_MOESM10_ESM.pdf]

## Supplemental material 4 – Examples of use of freehand tool

Examples of use of freehand tool in NanoZoomer 2.0 digital image scanner's (Hamamatsu photonics, Japan)

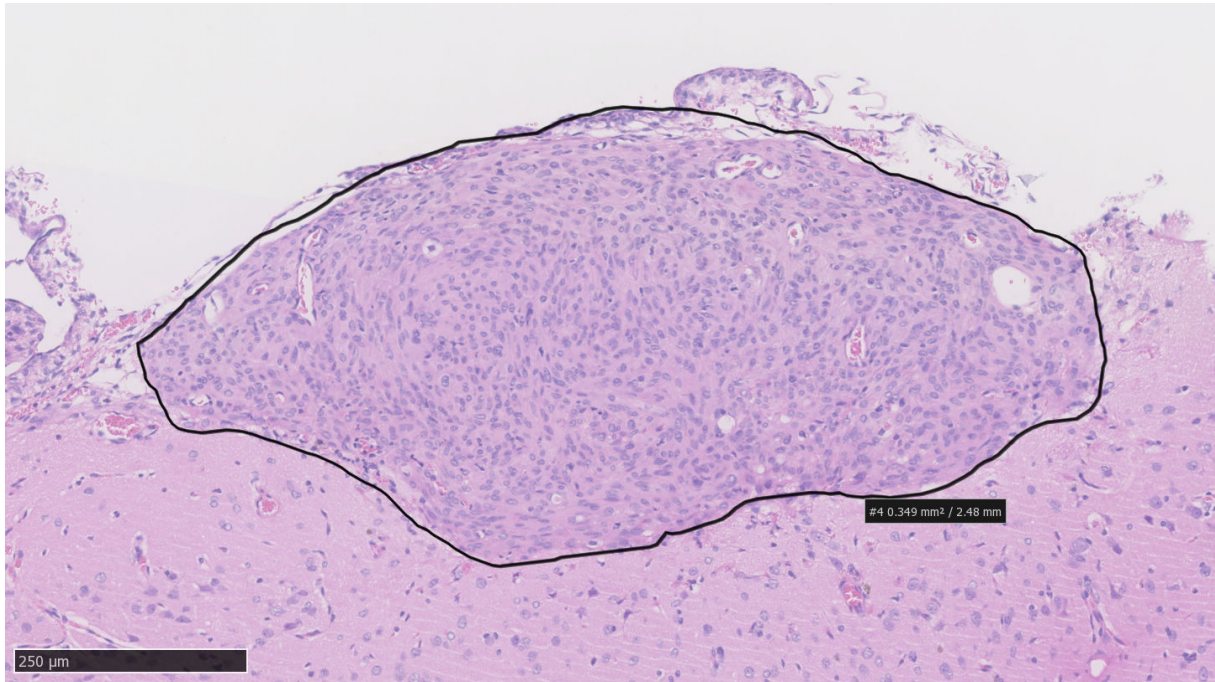

**Supplemental material figure 4.1.** Examples of use of freehand tool in NanoZoomer 2.0 digital image scanner's (Hamamatsu photonics, Japan). 10x image

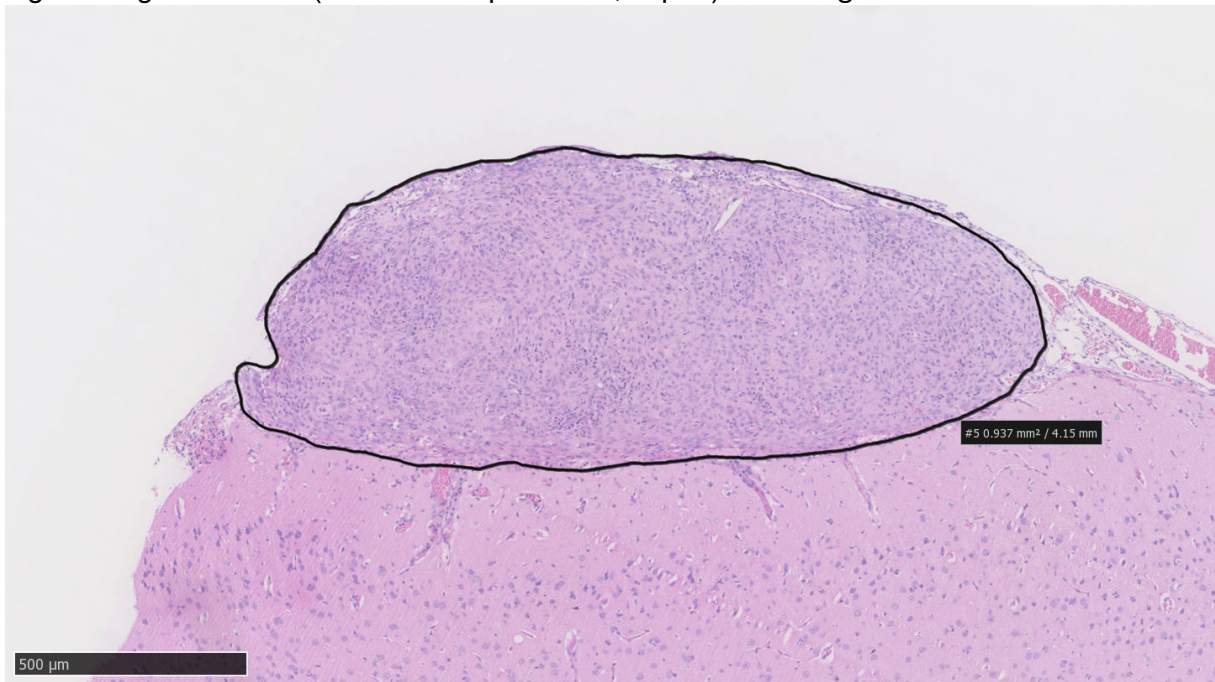

**Supplemental material figure 4.2** Examples of use of freehand tool in NanoZoomer 2.0 digital image scanner's (Hamamatsu photonics, Japan). 5x image
