# Supplementary material for: Orthotopic meningioma rat model exhibits morphological and immunohistochemical congruency and epigenetic concordance with benign primary patient-derived tumors
Source: PubMed Central journal article supplement — Sci Rep. 2024 Dec 30;14:31933. doi: 10.1038/s41598-024-83456-7 (PMC11686083; doi:10.1038/s41598-024-83456-7), 2024-12-30
Supplement: 41598_2024_83456_MOESM12_ESM.pdf [file 41598_2024_83456_MOESM12_ESM.pdf]

## Supplemental Material 8 – Examples of immunohistochemical staining and grades (in 10x)

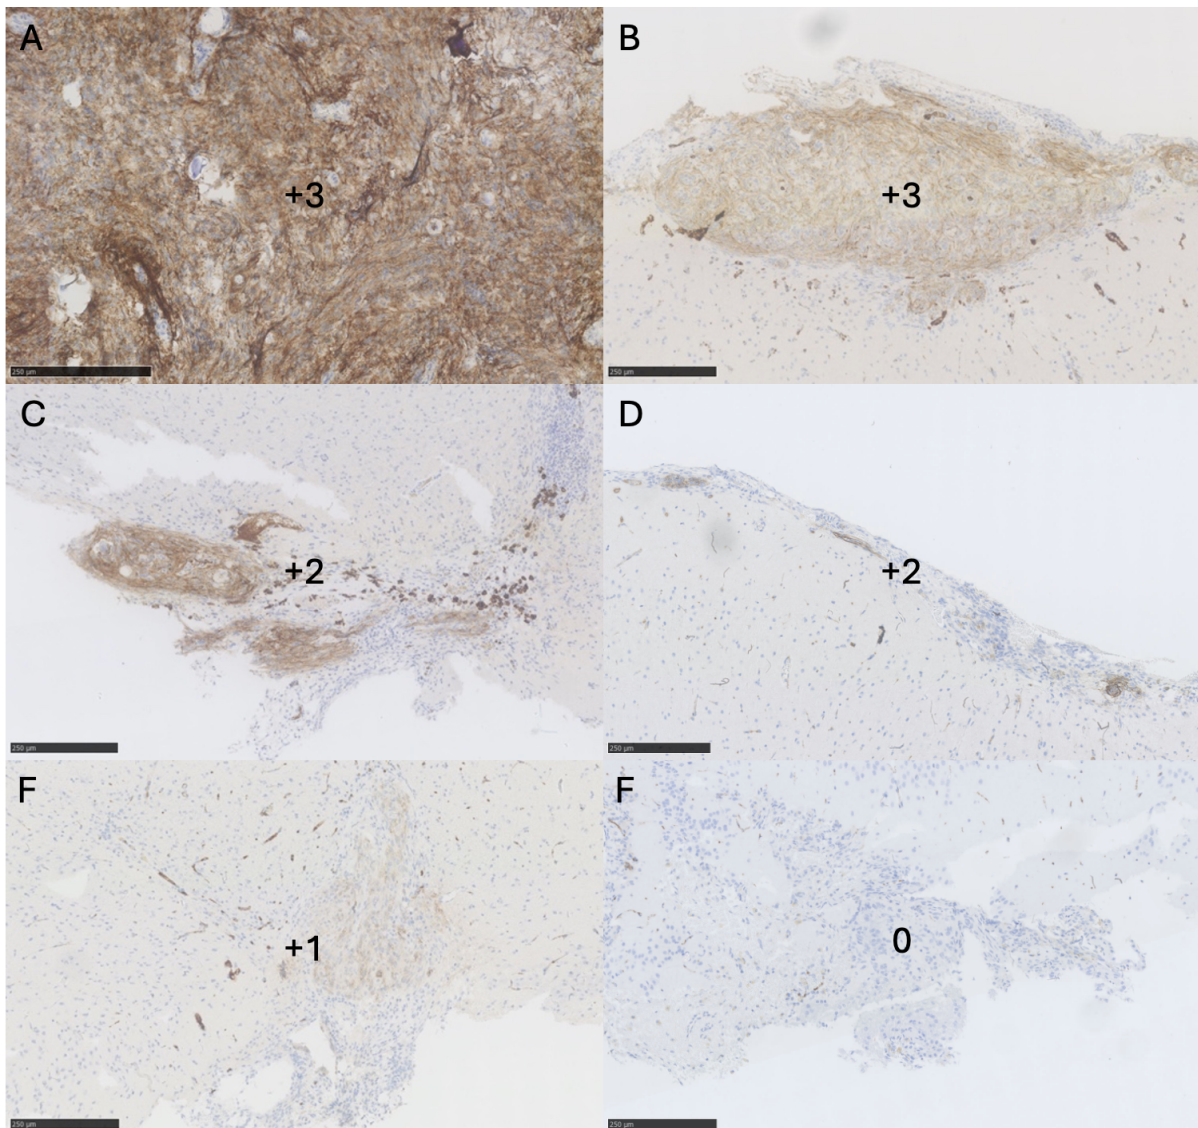

**Supplemental material figure 8.1** Epithelial Membrane Antigen (EMA) staining examples including scores. **A.** a primary patient-derived tumor. **B-F.** Xenografts from various tumors

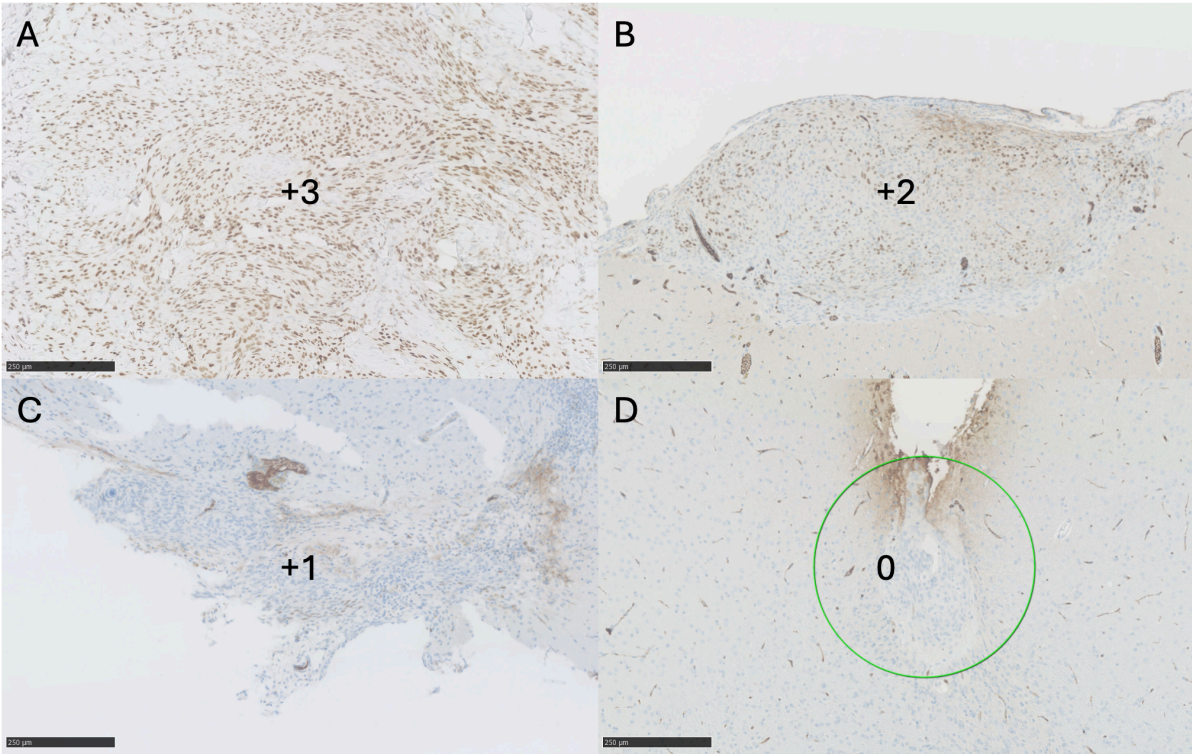

**Supplemental material figure 8.2** Progesterone receptor (PR) staining examples including scores. **A.** a primary patient-derived tumor. **B-D.** Xenografts from various tumors

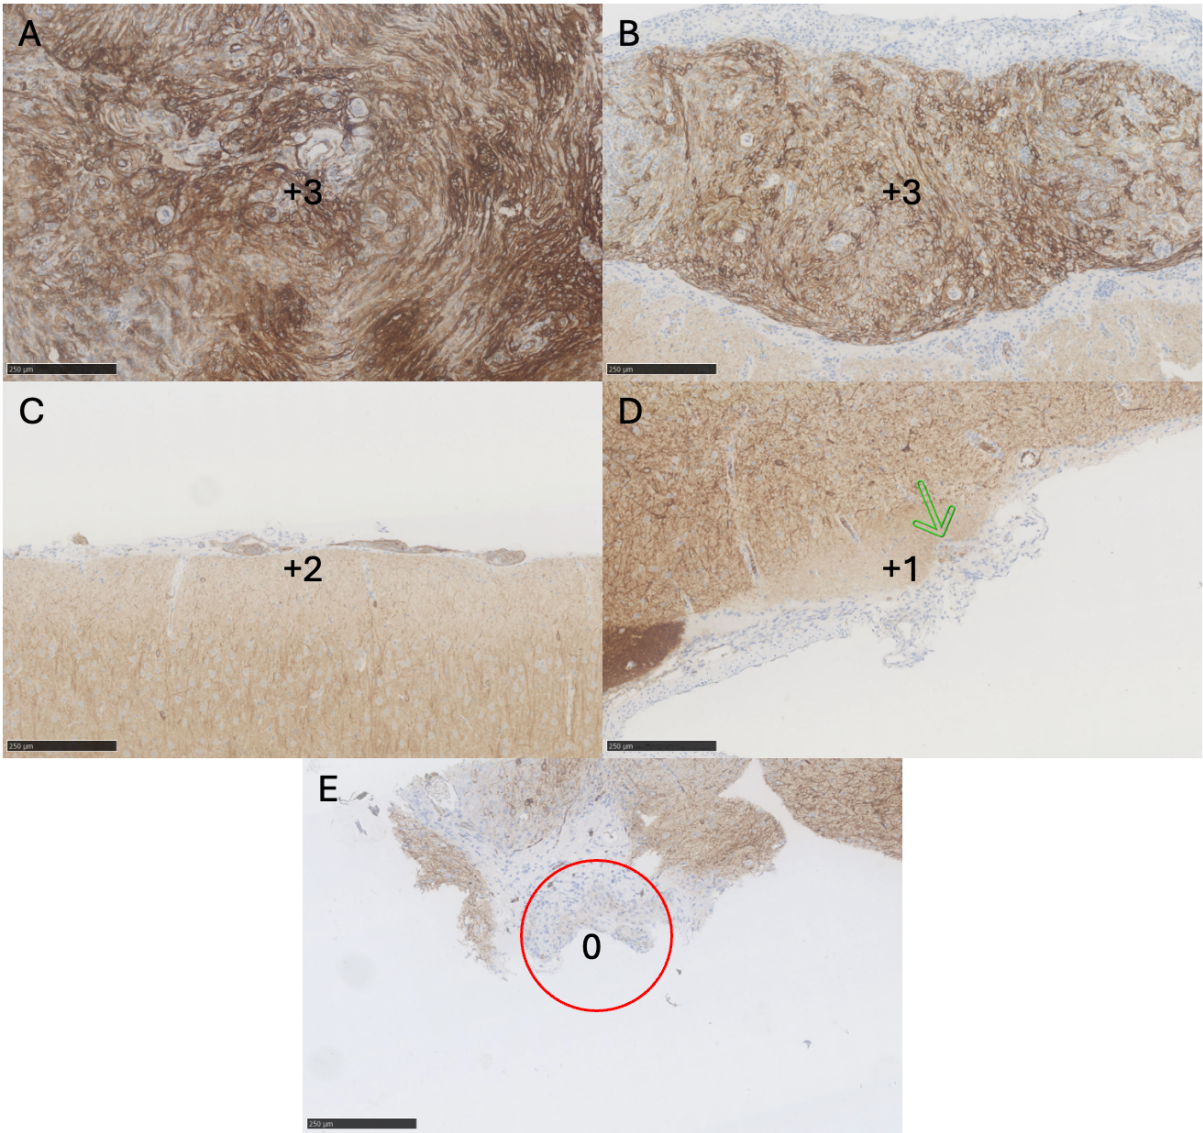

**Supplemental material figure 8.3** Somatostatin receptor (SSTR) staining examples including scores. **A.** a primary patient-derived tumor. **B-E.** Xenografts from various tumors

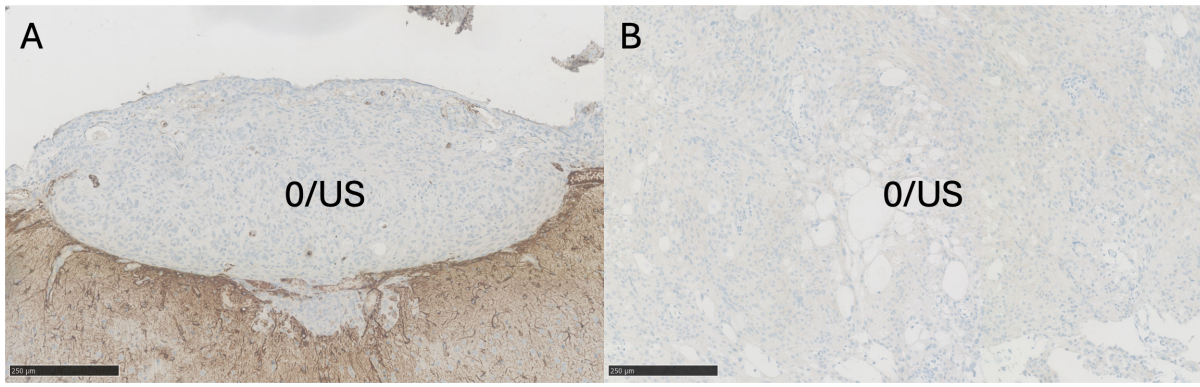

**Supplemental material figure 8.4** Glial Fibrillary Acidic protein (GFAP) staining examples including scores. **A+B.** Xenograft and primary tumor sample examples showing no staining/unspecific staining.

## Glial Fibrillary Acidic Protein – GFAP

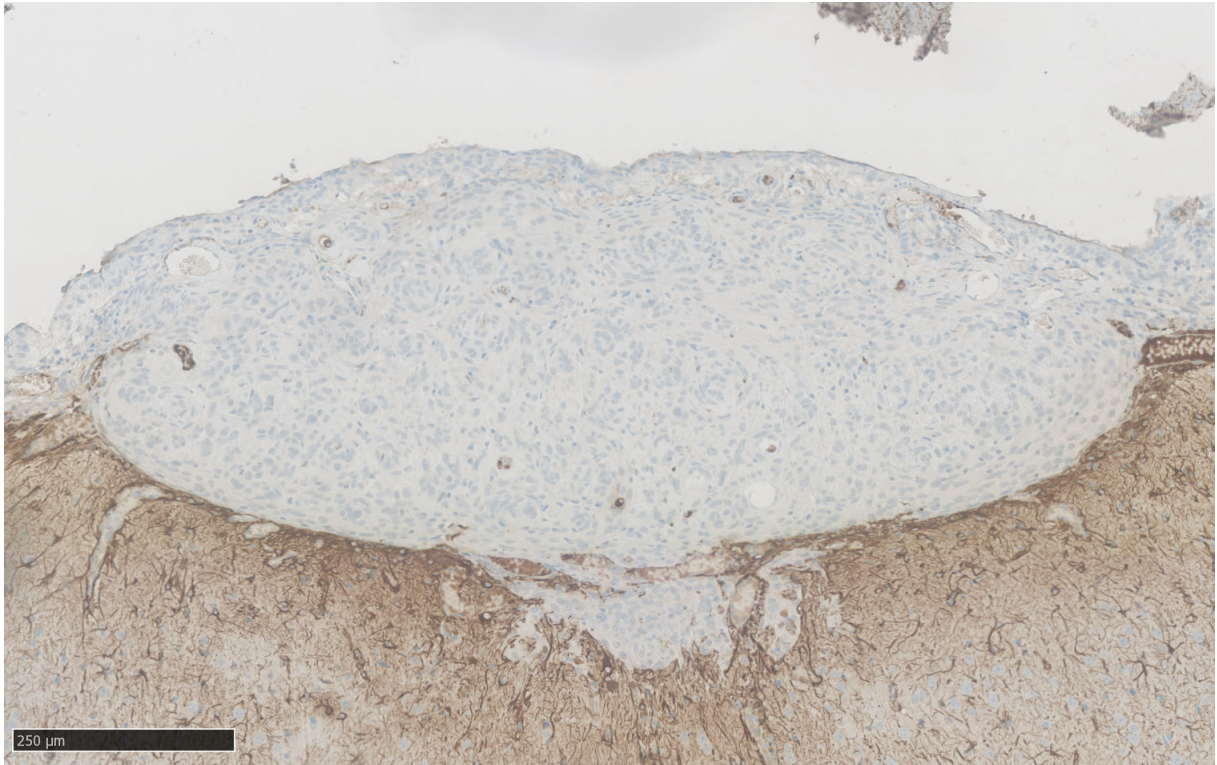

250  $\mu$ m

Grade 0/US (unspecific), MO-4#12

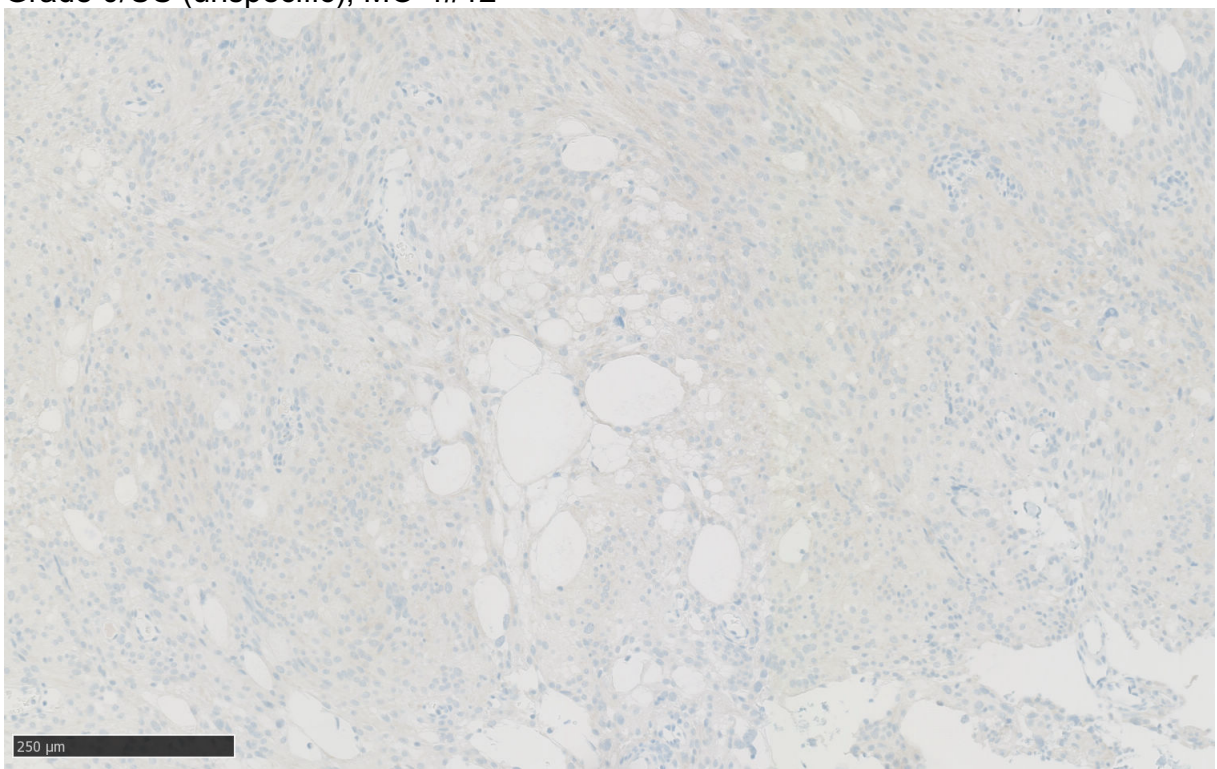

250  $\mu$ m

Grade 0/US, MO-12-Tumor
